# Supplementary material for: The landscape of transcriptional and translational changes over 22 years of bacterial adaptation
Source: bioRxiv preprint, doi:10.1101/2021.01.12.426406, version 1 (2021-01-13)
Supplement: Supplemental Table 7 - expression fold-changes [file 426406_file08.csv]

seqtype	line	target_id	baseMean	log2FoldChange	lfcSE	pvalue	padj	deleted	sig
ribo	Ara-1	ECB_00001	288.90276584037395	-0.8845555724832874	0.3196555708260469	9.929811463670283e-4	0.016164430792499327	FALSE	FALSE
ribo	Ara-1	ECB_00002	5201.816185441337	-0.9894253619202844	0.27899280115770636	5.8037037697750114e-5	0.0014288622752198147	FALSE	TRUE
ribo	Ara-1	ECB_00003	1221.6843876934563	-0.8603910146956022	0.3967624502246521	0.004854884595306954	0.0560569814318582	FALSE	FALSE
ribo	Ara-1	ECB_00004	2128.5853508791424	-0.9419031853248131	0.31246652491007476	3.925405176028226e-4	0.007693277644334267	FALSE	TRUE
ribo	Ara-1	ECB_00005	50.68776146023874	-0.27357308002096964	0.42545636796613245	0.29337087971179004	0.659907138545816	FALSE	FALSE
ribo	Ara-1	ECB_00006	117.7958456636965	0.08670841496063471	0.29489231588409026	0.717329625961278	0.9090150828872204	FALSE	FALSE
ribo	Ara-1	ECB_00007	11.498740687624199	0.26090802362719184	0.4574455500961992	0.3062551621125184	0.6713275407896926	FALSE	FALSE
ribo	Ara-1	ECB_00008	2635.477879671178	-0.578285049092466	0.2923507320744186	0.01690107383217429	0.1268219117028897	FALSE	FALSE
ribo	Ara-1	ECB_00009	68.38713728125204	-0.12537952424254417	0.3050881032511416	0.6018851187954111	0.8543096742276458	FALSE	FALSE
ribo	Ara-1	ECB_00010	68.89590469270989	1.362815712520043	0.5708789767895663	0.0019058396015578282	0.026907564801141093	FALSE	FALSE
ribo	Ara-1	ECB_00011	2.032603870243863	-0.05692705013233604	0.4787229446431302	0.686377384321972	NA	FALSE	FALSE
ribo	Ara-1	ECB_00012	0.7370472086936234	-0.06491372853037186	0.4978266485560205	0.5006361725443655	NA	FALSE	FALSE
ribo	Ara-1	ECB_00013	0.9853031751743393	-0.12127789505779375	0.5074893829271152	0.2731234888531282	NA	FALSE	FALSE
ribo	Ara-1	ECB_00014	4581.218379350881	-0.21275225667434425	0.35771070436698715	0.39974317836108114	0.7424157907342025	FALSE	FALSE
ribo	Ara-1	ECB_00015	262.03453882176217	-0.4758302816098887	0.4187288687993813	0.09381376804036333	0.3701605496585992	FALSE	FALSE
ribo	Ara-1	ECB_00017	17.739357087420363	0.024291441598492263	0.3932170221755062	0.9202327921591745	0.9747886696743936	FALSE	FALSE
ribo	Ara-1	ECB_00018	94.35598003244235	-0.2748858750326387	0.33537765327620594	0.27804464856740996	0.6427070499579306	FALSE	FALSE
ribo	Ara-1	ECB_00019	21.63649814075046	0.025331189331169273	0.3612094184454844	0.9196785107361666	0.9746432883255213	FALSE	FALSE
ribo	Ara-1	ECB_00020	0.792256196748475	-0.002475008712001139	0.48469554502244266	0.9971757294686423	NA	FALSE	FALSE
ribo	Ara-1	ECB_00021	0.875850179696934	0.007163998400689756	0.4845629598687245	0.9553284326464386	NA	FALSE	FALSE
ribo	Ara-1	ECB_00022	0	NA	NA	NA	NA	FALSE	FALSE
ribo	Ara-1	ECB_00025	0.12329239785853273	-0.01563414401276606	0.49482465459085223	0.9268960539205255	NA	FALSE	FALSE
ribo	Ara-1	ECB_00026	1.470703700610343	0.007999046462262613	0.4774784203574381	0.9512435402038134	NA	FALSE	FALSE
ribo	Ara-1	ECB_00027	1596.7657351113685	0.4435027052996141	0.3903891520380545	0.12099638021146254	0.4270773594760076	FALSE	FALSE
ribo	Ara-1	ECB_00028	3.197865603876047	0.20899737999494727	0.5057749038249032	0.285399636877534	NA	FALSE	FALSE
ribo	Ara-1	ECB_00029	106.73666629890043	-0.10910004511654624	0.2851339840810986	0.6387333921981433	0.8728379703478297	FALSE	FALSE
ribo	Ara-1	ECB_00030	3241.491308893302	-0.11716512504015285	0.2628142988074449	0.5961395161670102	0.8529777227000592	FALSE	FALSE
ribo	Ara-1	ECB_00031	209.48491127535615	-0.3776793140389371	0.3193316021797875	0.13147268978975252	0.4447358861002813	FALSE	FALSE
ribo	Ara-1	ECB_00032	111.62520031423081	-0.10093576446847605	0.31925494622379297	0.6791949105663487	0.8842737679678444	FALSE	FALSE
ribo	Ara-1	ECB_00033	282.7380454200786	-0.22577798169119734	0.3003861608936875	0.34544221155574995	0.7062953659743165	FALSE	FALSE
ribo	Ara-1	ECB_00034	19.60083254339244	-0.07394148296823295	0.3759772851957926	0.7644877543382222	0.9299342671186461	FALSE	FALSE
ribo	Ara-1	ECB_00035	427.1394339327867	-0.43610067715566986	0.32523064103002614	0.08626678107405575	0.3510775147808908	FALSE	FALSE
ribo	Ara-1	ECB_00036	1484.464768104598	2.062808123138025	0.5501236026643903	1.801298141801877e-5	4.878242876752538e-4	FALSE	TRUE
ribo	Ara-1	ECB_00037	3755.0515204283597	1.1341689509889998	0.45713625429552684	0.0019801441881897733	0.027564717460828666	FALSE	FALSE
ribo	Ara-1	ECB_00038	6.508368496647694	0.16699648417633495	0.4511941611105193	0.4638521278101783	NA	FALSE	FALSE
ribo	Ara-1	ECB_00039	4.237710560352372	0.09636401975718845	0.4570870178188102	0.6220010741692462	NA	FALSE	FALSE
ribo	Ara-1	ECB_00040	4.344341882100432	0.07571129827963949	0.4499007741042337	0.7041144389423267	NA	FALSE	FALSE
ribo	Ara-1	ECB_00041	2.3848550266745194	0.21935055297241227	0.5268592633600011	0.21995346006148753	NA	FALSE	FALSE
ribo	Ara-1	ECB_00043	10.09170096210525	-0.21646440916669726	0.44915329577123475	0.3795892567037885	0.7262661501095607	FALSE	FALSE
ribo	Ara-1	ECB_00044	1.0805611925021328	-0.13389801952401803	0.5111917551277212	0.23314684018115964	NA	FALSE	FALSE
ribo	Ara-1	ECB_00045	3.7667669099608188	0.05472825320811967	0.4524235518178982	0.7740467851948019	NA	FALSE	FALSE
ribo	Ara-1	ECB_00046	3.0819419235632304	0.01231915078295364	0.4557473907760789	0.9463832619493292	NA	FALSE	FALSE
ribo	Ara-1	ECB_00047	0.9137131944820421	-0.022523830314883427	0.48350580227632445	0.8560441594101751	NA	FALSE	FALSE
ribo	Ara-1	ECB_00048	1.1259415463026154	-0.020309853930889035	0.48381358517106843	0.8342945109549631	NA	FALSE	FALSE
ribo	Ara-1	ECB_00049	2.687947915283961	-0.0913884353482308	0.4763775606714327	0.5681782988196813	NA	FALSE	FALSE
ribo	Ara-1	ECB_00050	6.606106449443468	-0.18581125155100092	0.4761498775417236	0.38339846832972474	NA	FALSE	FALSE
ribo	Ara-1	ECB_00051	48.416477353682794	-0.23438087270252406	0.34254109470614275	0.35557380865964233	0.7124027452997602	FALSE	FALSE
ribo	Ara-1	ECB_00052	195.92633124733607	1.270653086645982	0.4310359867513487	4.4286850015654104e-4	0.008350033303584402	FALSE	TRUE
ribo	Ara-1	ECB_00053	211.12394126739372	-0.3090350878950065	0.2915285522575407	0.1925300222228669	0.5300803476912388	FALSE	FALSE
ribo	Ara-1	ECB_00054	53.93864542973664	0.08263838037697975	0.3223213808001429	0.7385146228016293	0.9178285612540898	FALSE	FALSE
ribo	Ara-1	ECB_00055	375.4753660025584	-0.23335389986971208	0.3217048945050921	0.34485992722904785	0.7060740365741124	FALSE	FALSE
ribo	Ara-1	ECB_00056	123.77329076187412	-0.18712668748569763	0.3027270032692377	0.43506039567237037	0.7646282706241837	FALSE	FALSE
ribo	Ara-1	ECB_00057	1576.88161265594	-0.1691838744487509	0.27138587103647005	0.45362318568902044	0.7780362888435004	FALSE	FALSE
ribo	Ara-1	ECB_00058	741.4871970144155	-0.003378825615409468	0.269955556960325	0.9837327276319402	0.9923575977723643	FALSE	FALSE
ribo	Ara-1	ECB_00059	226.2578030244397	0.059265161306508524	0.2815102072931122	0.8005611414846234	0.9437560904165783	FALSE	FALSE
ribo	Ara-1	ECB_00060	52.166037211156876	1.1557071283543277	0.41851955878852004	8.09479716460775e-4	0.013779657573352278	FALSE	FALSE
ribo	Ara-1	ECB_00061	324.98511223592124	1.5585025294646662	0.42920068949626616	3.401303572562664e-5	8.734899433331186e-4	FALSE	TRUE
ribo	Ara-1	ECB_00062	36.27324748619604	-0.3246592678903867	0.41557291281748715	0.23082617919441342	0.5872170690180679	FALSE	FALSE
ribo	Ara-1	ECB_00063	0.8426607093259497	-0.09225765682309378	0.5017133902504851	0.36491496120618416	NA	FALSE	FALSE
ribo	Ara-1	ECB_00064	10.46465898640751	0.27893310462582416	0.45746407178496373	0.2849996145323283	0.6495897870633558	FALSE	FALSE
ribo	Ara-1	ECB_00065	2.3690775952292866	0.11938000809034535	0.48088896160704253	0.4794020375152745	NA	FALSE	FALSE
ribo	Ara-1	ECB_00066	17.20984183835372	-0.23788590937045212	0.4152310068899535	0.35970271171355334	0.7124027452997602	FALSE	FALSE
ribo	Ara-1	ECB_00067	58.55767374805256	-0.37249576474078333	0.4469225188580927	0.1759872287102648	0.5082845721172412	FALSE	FALSE
ribo	Ara-1	ECB_00068	9.723690084233594	-0.04660650235961554	0.4222432443278281	0.8317714308170135	0.9484268248875608	FALSE	FALSE
ribo	Ara-1	ECB_00069	5.2676369452597065	0.15705519954205896	0.46028018772265783	0.47344684846440976	NA	FALSE	FALSE
ribo	Ara-1	ECB_00070	11.224699118395245	-0.09145360600520161	0.41419218371557787	0.6960626542910107	0.8976496307934723	FALSE	FALSE
ribo	Ara-1	ECB_00071	39.44760649304153	-0.18951230641859393	0.3481387367999197	0.45402841277026307	0.7780362888435004	FALSE	FALSE
ribo	Ara-1	ECB_00072	30.714414127922396	0.018387758033093986	0.3341024953098527	0.9416827363452466	0.9788111903602545	FALSE	FALSE
ribo	Ara-1	ECB_00073	733.089764000707	-0.3096485146809459	0.36419716133585683	0.23420668983141985	0.5917741552229004	FALSE	FALSE
ribo	Ara-1	ECB_00074	1401.6614853617782	-0.23296680191195188	0.3607171559233607	0.3602806925142677	0.7124027452997602	FALSE	FALSE
ribo	Ara-1	ECB_00075	1368.0440578666432	-0.35186377988480577	0.3844392470933768	0.18717209126069104	0.5211080933323351	FALSE	FALSE
ribo	Ara-1	ECB_00076	875.1266638143748	-0.07669331613933361	0.34628327173610784	0.7562496801696517	0.926293116177128	FALSE	FALSE
ribo	Ara-1	ECB_00077	280.24915528804087	-0.2379405172753096	0.30762938702594383	0.3259055499485779	0.6896916829255694	FALSE	FALSE
ribo	Ara-1	ECB_00078	5.363825762655751	-0.13716969293678205	0.45847113873981565	0.5185429350829938	NA	FALSE	FALSE
ribo	Ara-1	ECB_00079	1004.718246598711	0.3794830661391589	0.3118839200415738	0.13371253818795809	0.44756140591227767	FALSE	FALSE
ribo	Ara-1	ECB_00080	271.9544036430574	0.08510885341688346	0.2813452035983697	0.7159170168412141	0.908699102330625	FALSE	FALSE
ribo	Ara-1	ECB_00081	292.14631089726686	-0.07378473986730326	0.2742563699280436	0.7448928149390065	0.9218554643223551	FALSE	FALSE
ribo	Ara-1	ECB_00082	70.97814532853545	-0.27069855667593806	0.33936930705941143	0.28585737235067543	0.6510467218904145	FALSE	FALSE
ribo	Ara-1	ECB_00083	345.34158280677707	-0.24908273949286913	0.27148926865377065	0.2710151622839929	0.6355316559579219	FALSE	FALSE
ribo	Ara-1	ECB_00084	51.17168192219269	-0.42166043901477884	0.4043415296111758	0.13075570540059	0.4446589570643352	FALSE	FALSE
ribo	Ara-1	ECB_00085	376.01141188222823	0.33877872753292065	0.29861538149876476	0.16725222039386975	0.49674128508813165	FALSE	FALSE
ribo	Ara-1	ECB_00086	622.4785169602868	-0.20745419732178277	0.26935055976988137	0.3568159022851532	0.7124027452997602	FALSE	FALSE
ribo	Ara-1	ECB_00087	308.9838989877659	-0.04020528266645795	0.25608197075674805	0.8530372657385915	0.9550019059078281	FALSE	FALSE
ribo	Ara-1	ECB_00088	469.25450237531544	-0.237001343396512	0.25967131548955535	0.2814287745295814	0.6458985510967821	FALSE	FALSE
ribo	Ara-1	ECB_00089	542.1983836566524	-0.39423668526299865	0.27450355912871954	0.0853217945064966	0.349747274876623	FALSE	FALSE
ribo	Ara-1	ECB_00090	184.0492983115957	-0.153537482858224	0.3161966363947916	0.5288828373536474	0.8150760333556728	FALSE	FALSE
ribo	Ara-1	ECB_00091	197.08446831837045	-0.1783453530001657	0.270624175379766	0.430169325799371	0.7627823937835275	FALSE	FALSE
ribo	Ara-1	ECB_00092	565.7286634889224	-0.2456175328375302	0.2773377818186712	0.283940016349387	0.6486635802951103	FALSE	FALSE
ribo	Ara-1	ECB_00093	400.155252383748	-0.06198492023981194	0.25695125098217975	0.7763388676687106	0.9360576901987279	FALSE	FALSE
ribo	Ara-1	ECB_00094	133.18670067524175	-0.1886544104367129	0.3308195231217182	0.446569991340103	0.7721021498561619	FALSE	FALSE
ribo	Ara-1	ECB_00095	617.3189891387351	-0.4422825736903821	0.27126060208280905	0.05233507534849783	0.26650630677465814	FALSE	FALSE
ribo	Ara-1	ECB_00096	3027.8655297997793	-0.3295270029744769	0.269517004743244	0.143586040666166	0.4624246650210903	FALSE	FALSE
ribo	Ara-1	ECB_00097	2224.266122815064	-0.6637063712471301	0.27034180274958763	0.004204013882426692	0.05049902159576256	FALSE	FALSE
ribo	Ara-1	ECB_00098	56.27136880786943	0.04530320496536857	0.3278331359518258	0.8554726439617972	0.9556477995806305	FALSE	FALSE
ribo	Ara-1	ECB_00099	3394.561643538225	-0.24248547919311522	0.29265336961586164	0.3033474438832416	0.6664248048142896	FALSE	FALSE
ribo	Ara-1	ECB_00101	110.40528205691214	0.051365093997470204	0.29502547030885246	0.8303036783694132	0.9484268248875608	FALSE	FALSE
ribo	Ara-1	ECB_00102	188.56958936068315	-0.19648024537183312	0.29477934085069274	0.4067186387051999	0.7492979744606002	FALSE	FALSE
ribo	Ara-1	ECB_00103	29.57082567371055	-0.014887190122820746	0.3530064521071462	0.950823255520105	0.9826131338720357	FALSE	FALSE
ribo	Ara-1	ECB_00104	313.8197508602223	-0.09164209816743095	0.2716725046032914	0.6846998565070199	0.886786913015923	FALSE	FALSE
ribo	Ara-1	ECB_00105	5.890590912359864	0.06227804003842799	0.4326818660163183	0.7744504314941087	NA	FALSE	FALSE
ribo	Ara-1	ECB_00106	6.128825678332449	0.16823841916949656	0.4530996275393464	0.46153175645184935	NA	FALSE	FALSE
ribo	Ara-1	ECB_00107	0	NA	NA	NA	NA	FALSE	FALSE
ribo	Ara-1	ECB_00108	141.4241078953386	-0.24532765079616667	0.2943692314763034	0.3020068434028286	0.6657660271683956	FALSE	FALSE
ribo	Ara-1	ECB_00109	151.81849561171725	-0.1754589702168319	0.3493047652140428	0.48448649319639925	0.7925783982603368	FALSE	FALSE
ribo	Ara-1	ECB_00110	132.09041145285806	-0.08437698660011399	0.3372841304191531	0.7313900319605852	0.9127821136198506	FALSE	FALSE
ribo	Ara-1	ECB_00111	1833.2053797428844	-0.22032997899510565	0.32192611132886967	0.3714107763110855	0.7175309355581866	FALSE	FALSE
ribo	Ara-1	ECB_00112	205.61873465281727	0.27442989677667873	0.3195201798731563	0.2780225937752613	0.6427070499579306	FALSE	FALSE
ribo	Ara-1	ECB_00113	10242.848895285531	-0.05002113947268137	0.3516808695791402	0.8327687992684458	0.9484268248875608	FALSE	FALSE
ribo	Ara-1	ECB_00114	4607.716850263965	0.041958726417115934	0.35242409804582453	0.8715752139814815	0.9619942802707794	FALSE	FALSE
ribo	Ara-1	ECB_00115	3899.945550253688	-5.549923066371724e-4	0.31932360593408127	0.9941912441351475	0.9968682989830375	FALSE	FALSE
ribo	Ara-1	ECB_00116	6.857393146064932	0.05094634602543711	0.42342621956078036	0.8201263424254298	NA	FALSE	FALSE
ribo	Ara-1	ECB_00117	5832.125747188119	0.541584892971259	0.2955070186271228	0.03011408196575025	0.18573467945335403	FALSE	FALSE
ribo	Ara-1	ECB_00118	39.213713652000386	-0.2195139737382317	0.35378917702645607	0.3898511403922191	0.7336491138524451	FALSE	FALSE
ribo	Ara-1	ECB_00119	243.5089261576135	0.8868650552617329	0.41558484061685624	0.006769480168002867	0.07026578892153498	FALSE	FALSE
ribo	Ara-1	ECB_00120	525.2213931695145	1.2704547004863107	0.4297752838300585	4.305955449835358e-4	0.008329507327960735	FALSE	TRUE
ribo	Ara-1	ECB_00121	91.19972751138054	-0.08981415211693392	0.32688649995077945	0.7141878909980757	0.9084193322248372	FALSE	FALSE
ribo	Ara-1	ECB_00122	358.28829002187445	0.3482761027187383	0.41305259404975364	0.21357112792809924	0.5576059510059664	FALSE	FALSE
ribo	Ara-1	ECB_00123	910.4453959673597	-0.22577935835060875	0.29158285566035885	0.3376756198986984	0.696047254098899	FALSE	FALSE
ribo	Ara-1	ECB_00124	456.27375946190887	-0.12762909056082833	0.28149378688761156	0.5797932352374396	0.8458316936079037	FALSE	FALSE
ribo	Ara-1	ECB_00125	1221.312912167846	0.03265154913481962	0.266000568211862	0.886269974542288	0.9660088368285906	FALSE	FALSE
ribo	Ara-1	ECB_00126	220.23090712361085	-0.5018566443825905	0.3801376830766939	0.0700938390044819	0.3088898615301059	FALSE	FALSE
ribo	Ara-1	ECB_00127	184.97727451358497	-0.042141222161827044	0.2750050559645917	0.852334454569984	0.9550019059078281	FALSE	FALSE
ribo	Ara-1	ECB_00128	22.022399341221675	-0.05676274486160024	0.37303050663382187	0.8158512346681932	0.9466025468786383	FALSE	FALSE
ribo	Ara-1	ECB_00129	32.01093748612331	0.1204043825229995	0.34190023519247825	0.6320900051694054	0.8685256696099561	FALSE	FALSE
ribo	Ara-1	ECB_00130	1255.2334516801468	-0.5695088201762379	0.3125058519046192	0.024041106163884357	0.16130282716714303	FALSE	FALSE
ribo	Ara-1	ECB_00131	21.429808209357542	0.13317810926586426	0.38655256126403353	0.5944868353127346	0.8520106282904583	FALSE	FALSE
ribo	Ara-1	ECB_00132	393.2166083788093	-0.11709175670794027	0.257349472133758	0.5922497147722555	0.8510911241227928	FALSE	FALSE
ribo	Ara-1	ECB_00133	494.6737464725355	-0.040514804368036075	0.27518586317234867	0.8576669670341829	0.955820577407613	FALSE	FALSE
ribo	Ara-1	ECB_00134	9.529401306687474	0.013230925775030815	0.4104215948812779	0.9554002463806377	0.9834614146399171	FALSE	FALSE
ribo	Ara-1	ECB_00135	0.37936089854752364	-0.0379443765421372	0.4952364089290983	0.7862320059094507	NA	FALSE	FALSE
ribo	Ara-1	ECB_00136	1.004769097275908	0.058879181839735346	0.4853863944908925	0.6242068005738483	NA	FALSE	FALSE
ribo	Ara-1	ECB_00137	1.022821260677004	-0.10787144871427269	0.5050571889740224	0.2957317683215702	NA	FALSE	FALSE
ribo	Ara-1	ECB_00138	3.471415950705822	-0.16224465732714463	0.4969373639951634	0.34461966699206426	NA	FALSE	FALSE
ribo	Ara-1	ECB_00139	0.4275567448251433	0.030575924511670124	0.49086431270585273	0.7010970249144481	NA	FALSE	FALSE
ribo	Ara-1	ECB_00140	0.7787567622441749	0.013520576222534825	0.48632354802385497	0.8975396448323839	NA	FALSE	FALSE
ribo	Ara-1	ECB_00141	23.048119988086317	0.4319281155665254	0.4965713885753433	0.14468826551778105	0.46346918599727926	FALSE	FALSE
ribo	Ara-1	ECB_00142	429.7581211321051	0.3885965004968813	0.34948102348764426	0.14856593883028266	0.4713290008257849	FALSE	FALSE
ribo	Ara-1	ECB_00143	17.552646064233535	-0.10513268595937358	0.39783242402870317	0.6657787176208799	0.8824245183867696	FALSE	FALSE
ribo	Ara-1	ECB_00144	455.4972892661966	-0.9142462693710678	0.3236895111080822	7.757095911088342e-4	0.013357450126665994	FALSE	FALSE
ribo	Ara-1	ECB_00145	199.00963492178778	-0.7203404544954011	0.3555298160515762	0.01006161262575948	0.09192986643081452	FALSE	FALSE
ribo	Ara-1	ECB_00146	30.409962690057867	-0.19100265386682633	0.3954562859007815	0.44859214803065905	0.7729068877867746	FALSE	FALSE
ribo	Ara-1	ECB_00147	73.9896756333453	0.06423639859098453	0.29537995921240573	0.7878708985047074	0.9392306712216085	FALSE	FALSE
ribo	Ara-1	ECB_00148	382.1657583833547	-0.288948577059536	0.28795492373178566	0.21802560357171755	0.5662583025633362	FALSE	FALSE
ribo	Ara-1	ECB_00149	1793.4795631972474	-0.463003888721048	0.5549664837367794	0.10184119427795037	0.387464773632202	FALSE	FALSE
ribo	Ara-1	ECB_00150	122.16877942465254	-0.4368719857933675	0.5194483790702074	0.12135047894948252	0.4270773594760076	FALSE	FALSE
ribo	Ara-1	ECB_00151	115.28132789488762	-0.2750989630043312	0.44196645600581264	0.2845556917504445	0.6490745832500567	FALSE	FALSE
ribo	Ara-1	ECB_00152	257.6721117789347	-0.19549337494453056	0.42239017623579417	0.4261257868519689	0.7592277027703441	FALSE	FALSE
ribo	Ara-1	ECB_00153	1117.4879183621706	-0.11826814291516899	0.2469575712134897	0.5780275016780098	0.8453332977411836	FALSE	FALSE
ribo	Ara-1	ECB_00154	69.64305777984458	-0.023185692586519323	0.29275095364008313	0.9206719074430242	0.9747886696743936	FALSE	FALSE
ribo	Ara-1	ECB_00155	1877.2521614042091	-0.15827255971040177	0.3034114924343381	0.5081719913613476	0.8082457887162064	FALSE	FALSE
ribo	Ara-1	ECB_00156	29.419715580959323	0.09970422981009779	0.3653880907095866	0.6934949878040916	0.8951133313121269	FALSE	FALSE
ribo	Ara-1	ECB_00157	20.70457643117876	-0.1900493999010959	0.3907596368892526	0.45489724884056726	0.7780362888435004	FALSE	FALSE
ribo	Ara-1	ECB_00158	1066.8840667576785	-0.22942622715892222	0.25593840069080687	0.292232689316622	0.6595160465713764	FALSE	FALSE
ribo	Ara-1	ECB_00159	110.39910526651644	-0.3639254988565357	0.3550399129621459	0.1652832957483156	0.49626962148339165	FALSE	FALSE
ribo	Ara-1	ECB_00160	982.8281748340657	-0.4926034271471505	0.43205485622455775	0.08672935143193915	0.3524784964744157	FALSE	FALSE
ribo	Ara-1	ECB_00161	16.995849181581228	1.416604266115667	0.5732584279239578	0.0012857718419023968	0.019728760943387765	FALSE	FALSE
ribo	Ara-1	ECB_00162	259.9674667408931	-0.1527511483625796	0.2978236023188144	0.5199650170554306	0.8105614925988275	FALSE	FALSE
ribo	Ara-1	ECB_00163	14.011692954131	0.9845546565402896	0.6573127428447998	0.015444559168297184	0.11950478379833067	FALSE	FALSE
ribo	Ara-1	ECB_00164	4265.472183996556	0.2771694331027376	0.2709537018195278	0.23117914167135234	0.5875508542457303	FALSE	FALSE
ribo	Ara-1	ECB_00165	135.0011952662556	-0.3969614521465125	0.35056569711990504	0.12942887110998488	0.44204192857485813	FALSE	FALSE
ribo	Ara-1	ECB_00166	549.166677556507	-0.9276062256206429	0.36011344825894	0.0014842951215392087	0.021831533494752333	FALSE	FALSE
ribo	Ara-1	ECB_00167	6350.054262310419	0.11430236325914808	0.3089293853282919	0.6275114981128865	0.8646423463821873	FALSE	FALSE
ribo	Ara-1	ECB_00168	3627.9359582040875	0.4438358393041943	0.2712473654048727	0.056690957382254686	0.27696444062166314	FALSE	FALSE
ribo	Ara-1	ECB_00169	257.6876580351857	0.732642978814447	0.4055100880979304	0.01889484305748133	0.1356331023331009	FALSE	FALSE
ribo	Ara-1	ECB_00170	956.003205371233	0.051763106128421055	0.2805262065105401	0.8244907732410949	0.9468828631948973	FALSE	FALSE
ribo	Ara-1	ECB_00171	214.36174046690394	-0.18776599509469588	0.2841518490944699	0.4185015994313862	0.7535718581220333	FALSE	FALSE
ribo	Ara-1	ECB_00172	140.6569010161912	0.17842734721318665	0.3398186391174999	0.48447850582275115	0.7925783982603368	FALSE	FALSE
ribo	Ara-1	ECB_00173	122.48243994149968	0.24415411119625938	0.3228515415760327	0.33442955229024707	0.694753148952078	FALSE	FALSE
ribo	Ara-1	ECB_00174	262.4767597184161	0.254185713059958	0.27676510640607455	0.27508869282805454	0.6397261638835086	FALSE	FALSE
ribo	Ara-1	ECB_00175	2183.171925828571	0.1109623735644328	0.28409455077607393	0.6382959843130326	0.8726405402792676	FALSE	FALSE
ribo	Ara-1	ECB_00176	1725.1985842210743	0.034756456549721294	0.2706289440376483	0.8805438629996272	0.9639947629311393	FALSE	FALSE
ribo	Ara-1	ECB_00177	552.5536119021516	-0.060703051308897533	0.29776333604191835	0.7966821932200916	0.9419496083189345	FALSE	FALSE
ribo	Ara-1	ECB_00178	649.808231054076	0.038934187742815166	0.275282875048744	0.8677701784366585	0.9614894369545474	FALSE	FALSE
ribo	Ara-1	ECB_00179	720.6975732417474	-0.1074020952429077	0.28577436174488274	0.6433122297851882	0.8750563187352711	FALSE	FALSE
ribo	Ara-1	ECB_00180	102.7011614045779	-0.0553283547910255	0.2856221638080832	0.8103157420547127	0.9466025468786383	FALSE	FALSE
ribo	Ara-1	ECB_00181	111.42420667435269	0.10161918340322591	0.32312850969334406	0.6831142360210645	0.8863228698200135	FALSE	FALSE
ribo	Ara-1	ECB_00182	458.79710980067466	0.20956151578355464	0.2693538194438659	0.3603051357281719	0.7124027452997602	FALSE	FALSE
ribo	Ara-1	ECB_00183	1095.4496668807399	0.11735273533414335	0.28281208942950464	0.6166594919693018	0.8595152928998901	FALSE	FALSE
ribo	Ara-1	ECB_00184	44.52011262801375	0.04803601535823829	0.3252879054722331	0.846523781591319	0.9537800095917319	FALSE	FALSE
ribo	Ara-1	ECB_00185	67.87642367628382	-0.22358062817362934	0.3241210934462641	0.36947020861142726	0.7148866824726885	FALSE	FALSE
ribo	Ara-1	ECB_00186	78.23213158603798	-0.20578321427075405	0.33083140000221967	0.41018352779579736	0.7498392292438227	FALSE	FALSE
ribo	Ara-1	ECB_00187	70.07475275366	-0.40242577955149306	0.4327136943091444	0.14933524539394885	0.4722175014731259	FALSE	FALSE
ribo	Ara-1	ECB_00188	112.50066798781981	-0.7707904463425339	0.48089688913699413	0.0183847742030539	0.13307298413631186	FALSE	FALSE
ribo	Ara-1	ECB_00189	161.37821223796354	0.08054697736678994	0.2965041585882798	0.7371235308771098	0.9172477019561027	FALSE	FALSE
ribo	Ara-1	ECB_00190	9.922762234411763	0.38176147863119525	0.5019978217049359	0.17060555408253067	0.5022901810794762	FALSE	FALSE
ribo	Ara-1	ECB_00191	106.083306420289	0.05212173010136175	0.2821593526547878	0.8242339379322171	0.9468828631948973	FALSE	FALSE
ribo	Ara-1	ECB_00192	4.960436290298631	0.11728251637949115	0.4640562190758021	0.544674752270014	NA	FALSE	FALSE
ribo	Ara-1	ECB_00193	1576.5010004209348	-0.02130363529016584	0.29159983163856296	0.9278796172990109	0.976088914111246	FALSE	FALSE
ribo	Ara-1	ECB_00194	51.11919226546904	-0.04451572010188176	0.3433800408957409	0.8562014021754625	0.9556477995806305	FALSE	FALSE
ribo	Ara-1	ECB_00195	100.06327197595229	-0.16878460245087906	0.3248397125645368	0.4937976819870637	0.7986011371549744	FALSE	FALSE
ribo	Ara-1	ECB_00196	2715.5741309027694	-0.4769210979679381	0.3406638228860269	0.06788944599605466	0.3042313581097865	FALSE	FALSE
ribo	Ara-1	ECB_00197	127.63982831768593	-0.012404157207080688	0.35650155604501205	0.9581245238676199	0.9838858864535125	FALSE	FALSE
ribo	Ara-1	ECB_00198	92.96280345450602	0.14349916991584313	0.3934126906877833	0.5708966768744855	0.8400895728955794	FALSE	FALSE
ribo	Ara-1	ECB_00199	173.79672476601561	-0.026454239373040728	0.26832553330789444	0.9053759030395037	0.9694208370851878	FALSE	FALSE
ribo	Ara-1	ECB_00200	68.12334286028498	0.2625574746886714	0.3086003499666561	0.2879962026599399	0.6544192774092779	FALSE	FALSE
ribo	Ara-1	ECB_00201	45.80513658057386	-0.2859419417890342	0.3829854062208761	0.2772217524519561	0.6421800937436838	FALSE	FALSE
ribo	Ara-1	ECB_00202	314.9887788055423	-0.3204055922585246	0.31749327338033345	0.19541832596787465	0.534624000321229	FALSE	FALSE
ribo	Ara-1	ECB_00203	18.327175392310735	-0.045675121042192506	0.387157340677379	0.8487726448935455	0.9550019059078281	FALSE	FALSE
ribo	Ara-1	ECB_00204	193.45123863666146	0.8604060949717043	0.42391489858589565	0.009007635124620331	0.08573081481228105	FALSE	FALSE
ribo	Ara-1	ECB_00205	57.986527222829196	-0.0491822802711766	0.3245580231136746	0.8394557614776078	0.9511223709184965	FALSE	FALSE
ribo	Ara-1	ECB_00206	50.838471089164116	0.022164182970423246	0.320256449692233	0.9293236206085441	0.9766266551353963	FALSE	FALSE
ribo	Ara-1	ECB_00207	126.50591774263891	-0.043894745878432236	0.2724100421748792	0.845900082140342	0.9534378905395682	FALSE	FALSE
ribo	Ara-1	ECB_00208	156.70906722966018	-0.14672024206718232	0.28466000286678683	0.527691328380663	0.8150760333556728	FALSE	FALSE
ribo	Ara-1	ECB_00209	3.2658558113800376	-0.15110971046280722	0.49103900288158137	0.3825442829684412	NA	FALSE	FALSE
ribo	Ara-1	ECB_00212	1.2056179634240065	0.16517779077062625	0.5142993973546234	0.23624844796298608	NA	FALSE	FALSE
ribo	Ara-1	ECB_00213	0.9661173365457977	-0.09597205490538198	0.5026147998264954	0.33803932905113904	NA	FALSE	FALSE
ribo	Ara-1	ECB_00214	110.35228124151138	-0.5532956656671258	0.3846651435999	0.04955831399695671	0.2585537957914782	FALSE	FALSE
ribo	Ara-1	ECB_00215	51.342976928796354	0.04505446830165621	0.309811188294347	0.8532059728153848	0.9550019059078281	FALSE	FALSE
ribo	Ara-1	ECB_00216	25.617391129986558	0.15555699958914287	0.3912891775802974	0.5373932362918119	0.8234462512012272	FALSE	FALSE
ribo	Ara-1	ECB_00217	506.99860191943134	-1.0983656023219324	0.34289503786595754	1.576050138278878e-4	0.003427046249585969	FALSE	TRUE
ribo	Ara-1	ECB_00218	78.92514978688794	-0.9619421900733799	0.4460437518474794	0.004146913576930945	0.05001479978006998	FALSE	FALSE
ribo	Ara-1	ECB_00219	139.04381732299896	0.063767807769084	0.33555190829051185	0.7994136375563723	0.9435535383038736	FALSE	FALSE
ribo	Ara-1	ECB_00220	55.37488149227738	-0.16912228227985712	0.3498580076883989	0.5021315856813748	0.8047856085637201	FALSE	FALSE
ribo	Ara-1	ECB_00221	153.95182990484494	0.05418439569759784	0.28842996928915826	0.8189550273679805	0.9466025468786383	FALSE	FALSE
ribo	Ara-1	ECB_00222	2.8319286279395377	-0.01036151464981045	0.4649399092027365	0.9471959133872567	NA	FALSE	FALSE
ribo	Ara-1	ECB_00223	2.5500495443373645	0.1830874569155156	0.501781636703584	0.31298148810914694	NA	FALSE	FALSE
ribo	Ara-1	ECB_00226	18.65774611990112	-0.14693761014567064	0.4034143919368022	0.5487783556960313	0.8302194565651532	FALSE	FALSE
ribo	Ara-1	ECB_00227	27.011269973063996	0.17110671418584406	0.3572534079162963	0.5023573989303263	0.8047856085637201	FALSE	FALSE
ribo	Ara-1	ECB_00228	10.178221826408725	-0.029346127062206503	0.40503305693212055	0.8993711851914705	0.9679239107327312	FALSE	FALSE
ribo	Ara-1	ECB_00229	4.169516257842595	-0.09767745042181587	0.4601182165094075	0.6147123109309962	NA	FALSE	FALSE
ribo	Ara-1	ECB_00230	1.499422978300353	0.10664455916651346	0.48798677964834647	0.46637170314115206	NA	FALSE	FALSE
ribo	Ara-1	ECB_00231	1.1210483533572089	0.048612832075766534	0.4811929200896626	0.7060380795811905	NA	FALSE	FALSE
ribo	Ara-1	ECB_00232	1882.5405571768024	-0.029133226399824966	0.2569144111525143	0.8924761129986387	0.9668878332694049	FALSE	FALSE
ribo	Ara-1	ECB_00233	529.6898444351394	1.673745668544787	0.5264710491900528	1.5918675063737254e-4	0.0034363574648458893	FALSE	TRUE
ribo	Ara-1	ECB_00234	287.59787965151736	-0.23822115679120395	0.30572229755898545	0.3237858859097727	0.6884783398466902	FALSE	FALSE
ribo	Ara-1	ECB_00235	705.7831178437303	-0.2370623551041293	0.26791710724004275	0.29071511668634614	0.6580853591250951	FALSE	FALSE
ribo	Ara-1	ECB_00238	2.0159263235735776	-0.03554831644836594	0.4716952879307239	0.8109715630039015	NA	FALSE	FALSE
ribo	Ara-1	ECB_00239	616.0567396166621	-0.23419859645280755	0.31221118805512416	0.33637104850872607	0.6958994722928281	FALSE	FALSE
ribo	Ara-1	ECB_00240	619.1021880748871	-0.10262265007722894	0.27613198765270547	0.6511948316116423	0.8777870603489061	FALSE	FALSE
ribo	Ara-1	ECB_00241	15.184999513613665	-0.0524131833663171	0.4032580808483153	0.823015309906958	0.9468828631948973	FALSE	FALSE
ribo	Ara-1	ECB_00242	5.317365456377243	0.18447722493894853	0.4677638037721222	0.40735092250174537	NA	FALSE	FALSE
ribo	Ara-1	ECB_00243	8.112335669588388	0.5966670576745833	0.6475268419120902	0.06688952127975774	NA	FALSE	FALSE
ribo	Ara-1	ECB_00244	1.911113574212234	0.2957906280237654	0.5872465355800944	0.10118163262248545	NA	FALSE	FALSE
ribo	Ara-1	ECB_00245	0.3663706226869822	-0.037305519915096556	0.49523497515882187	0.7895009420617174	NA	FALSE	FALSE
ribo	Ara-1	ECB_00246	483.1101527364697	-0.2603599542104426	0.2786743814451227	0.2578812461877052	0.6185412499139885	FALSE	FALSE
ribo	Ara-1	ECB_00247	2.4786016177683163	-0.3088633178957065	0.6135488193447725	0.04129307380118411	NA	FALSE	FALSE
ribo	Ara-1	ECB_00248	8.267556534092883	-0.12961722994719935	0.440553053165622	0.5637076331795814	NA	FALSE	FALSE
ribo	Ara-1	ECB_00249	9.812808644261892	0.05023618311025094	0.40925857389435844	0.8307768973107847	0.9484268248875608	FALSE	FALSE
ribo	Ara-1	ECB_00250	3.617378160635652	0.06946774669692249	0.4620399592712691	0.7042562301374335	NA	FALSE	FALSE
ribo	Ara-1	ECB_00251	1.517755225174476	0.11259088894017796	0.4908605742639192	0.43009875573685397	NA	FALSE	FALSE
ribo	Ara-1	ECB_00252	38.650664949230396	0.08807881953340221	0.34217246375108096	0.7262033910647117	0.9106074984247476	FALSE	FALSE
ribo	Ara-1	ECB_00253	14.093401079190143	0.6627765599913428	0.5833618278911639	0.05323624744150238	0.2674270305697806	FALSE	FALSE
ribo	Ara-1	ECB_00254	157.44904708141675	1.0087840105840584	0.3821869053209567	0.0014865077966502948	0.021831533494752333	FALSE	FALSE
ribo	Ara-1	ECB_00255	4983.213179643343	-0.0012109396680803008	0.24879883717364445	0.9937226820357611	0.9968682989830375	FALSE	FALSE
ribo	Ara-1	ECB_00256	13.276805650393428	0.14065111927412235	0.4105231032382565	0.5671385674360205	0.8382983620628881	FALSE	FALSE
ribo	Ara-1	ECB_00257	17.419240694483616	-0.5614310758174681	0.5772947487866863	0.07908879008157572	0.33352190002692733	FALSE	FALSE
ribo	Ara-1	ECB_00258	0	NA	NA	NA	NA	FALSE	FALSE
ribo	Ara-1	ECB_00259	0	NA	NA	NA	NA	FALSE	FALSE
ribo	Ara-1	ECB_00260	10.159374735810418	0.0018380038879709786	0.4054336157865446	0.9948567745966624	0.9969264806476351	FALSE	FALSE
ribo	Ara-1	ECB_00261	3.3680665899094793	-0.07991887966903582	0.4655644712231162	0.6504468624048388	NA	FALSE	FALSE
ribo	Ara-1	ECB_00262	6.969550264739423	0.19247813882662904	0.45989644296046067	0.4094134763518318	NA	FALSE	FALSE
ribo	Ara-1	ECB_00263	21.664978173357653	-0.055537489157089066	0.3598162394827573	0.8220167290538478	0.9468828631948973	FALSE	FALSE
ribo	Ara-1	ECB_00264	8.062873962405146	0.29871013481813347	0.49547915385876645	0.23997516698186755	NA	FALSE	FALSE
ribo	Ara-1	ECB_00265	13.921281696757731	-0.2142895465660824	0.4225543664378819	0.3992970745990078	0.7420498972117556	FALSE	FALSE
ribo	Ara-1	ECB_00266	1.3249550123257483	0.05484822135352316	0.4821065708314281	0.6641289944334071	NA	FALSE	FALSE
ribo	Ara-1	ECB_00267	236.7132281052806	0.6472075185688625	0.5030989937703126	0.05197105370282319	0.2653067404386396	FALSE	FALSE
ribo	Ara-1	ECB_00268	183.11765980580816	0.3257639005627389	0.3716964462364891	0.22948456075967438	0.5853035158416695	FALSE	FALSE
ribo	Ara-1	ECB_00269	20.98537002333108	0.11267945511051955	0.40235186065998946	0.643881655141898	0.8750563187352711	FALSE	FALSE
ribo	Ara-1	ECB_00270	188.78155392335532	0.19580475095525426	0.35063777294455756	0.4475327549517479	0.7727578511739172	FALSE	FALSE
ribo	Ara-1	ECB_00271	8.573937703899597	-0.2275280334565333	0.47795461855426	0.33035512073922746	0.6915867214913272	FALSE	FALSE
ribo	Ara-1	ECB_00272	34.41558341307169	-0.39663409711964925	0.40374746446244175	0.1556821536647971	0.4790692464575794	FALSE	FALSE
ribo	Ara-1	ECB_00273	3.5572563830838595	-0.1267305347239973	0.4723846069302074	0.5045889057772206	NA	FALSE	FALSE
ribo	Ara-1	ECB_00274	12.105874917941467	-0.4079375176360271	0.5242923082706691	0.15365549207250304	0.4770444781430337	FALSE	FALSE
ribo	Ara-1	ECB_00275	0.32414126400663124	0.06431181108691172	0.4993559639669335	0.47184453376362495	NA	FALSE	FALSE
ribo	Ara-1	ECB_00276	3.2478036479789414	0.009171750872764409	0.45547028455270416	0.9601233546295047	NA	FALSE	FALSE
ribo	Ara-1	ECB_00277	9.166183037960563	0.4225178018402754	0.5314952458865781	0.1418054536114848	0.46067442345541243	FALSE	FALSE
ribo	Ara-1	ECB_00278	1.2293570271211276	-0.056849826845667265	0.48424801024368935	0.6530981391823696	NA	FALSE	FALSE
ribo	Ara-1	ECB_00279	40.61093203302351	-0.22158376718474257	0.3591347777650423	0.3866454053591578	0.7313121667078928	FALSE	FALSE
ribo	Ara-1	ECB_00280	69.0730809184042	-0.4204522071864688	0.35460908536269997	0.11415789566215208	0.41652190116162713	FALSE	FALSE
ribo	Ara-1	ECB_00281	0.33833624215624297	-0.04139223612800793	0.4950384994304783	0.7905373531115765	NA	FALSE	FALSE
ribo	Ara-1	ECB_00282	3.1245218966064496	-0.16224368916376464	0.4931587315020487	0.3693555399457372	NA	FALSE	FALSE
ribo	Ara-1	ECB_00283	2.3652310564638435	-0.005717892364515041	0.46736133803965785	0.9702003976376133	NA	FALSE	FALSE
ribo	Ara-1	ECB_00284	47.108308699563935	-0.8561657867669945	0.5194408745234271	0.014497289115860073	0.1164081516877282	FALSE	FALSE
ribo	Ara-1	ECB_00285	3.1958721556419745	0.11852898162058104	0.47240397110045224	0.5165066830817919	NA	FALSE	FALSE
ribo	Ara-1	ECB_00286	1.4202130296535418	0.04219322690563135	0.4795993866565159	0.7427770482031937	NA	FALSE	FALSE
ribo	Ara-1	ECB_00287	2.4932297660944465	0.01725066588071879	0.46933190653393503	0.9094974057196724	NA	FALSE	FALSE
ribo	Ara-1	ECB_00288	4.853196059858541	-0.25376118678588294	0.5484135420363281	0.16949298810958982	NA	FALSE	FALSE
ribo	Ara-1	ECB_00289	7.394930955264236	0.04883692408858608	0.43740016621568373	0.8149881365706827	NA	FALSE	FALSE
ribo	Ara-1	ECB_00290	216.9917807695716	3.156026588631784	0.7123784142185331	9.701235083163022e-7	3.5243877210661756e-5	FALSE	TRUE
ribo	Ara-1	ECB_00291	281.3112219828645	1.5156048825486774	0.5467293981268803	6.105836674425658e-4	0.010826956817329782	FALSE	FALSE
ribo	Ara-1	ECB_00292	23.93133267516099	-0.05023846390542566	0.3629627308649629	0.8384560740841868	0.9511223709184965	FALSE	FALSE
ribo	Ara-1	ECB_00293	2.596645246912958	-0.01109313743100569	0.46303896025155356	0.9457573435397167	NA	FALSE	FALSE
ribo	Ara-1	ECB_00294	13.429881439792558	-0.09975305857750968	0.39710545161259936	0.6829148258134606	0.8863228698200135	FALSE	FALSE
ribo	Ara-1	ECB_00295	0.7658929869813862	-0.0057406727812600936	0.48434248879707886	0.9776501190009669	NA	FALSE	FALSE
ribo	Ara-1	ECB_00296	2.6819104006250676	-0.008231964663191508	0.4611712416431094	0.9601573441064035	NA	FALSE	FALSE
ribo	Ara-1	ECB_00297	0.8391541384373338	-0.092052412342029	0.5016679248767754	0.3661960206480603	NA	FALSE	FALSE
ribo	Ara-1	ECB_00298	5.095628895993755	0.290482632642675	0.5244205602389218	0.21887433814166274	NA	FALSE	FALSE
ribo	Ara-1	ECB_00299	70.95220165088244	0.030179039932170245	0.29819440993167395	0.9003571996173327	0.9682902879639113	FALSE	FALSE
ribo	Ara-1	ECB_00300	14.171256963413526	0.2551031182275786	0.4451117887505006	0.32146577162040035	0.6864849703635646	FALSE	FALSE
ribo	Ara-1	ECB_00301	0	NA	NA	NA	NA	FALSE	FALSE
ribo	Ara-1	ECB_00302	2.664516052105721	0.03443532230942734	0.4674554779508158	0.8317449160243181	NA	FALSE	FALSE
ribo	Ara-1	ECB_00303	8.64376654174529	0.10200493974446433	0.4304447254893608	0.6549984429987659	0.8789700763668218	FALSE	FALSE
ribo	Ara-1	ECB_00304	1.5473449223571536	-0.06034074765780238	0.4857419757445241	0.5923541693518531	NA	FALSE	FALSE
ribo	Ara-1	ECB_00305	3.1329594435701953	-0.007502435723114416	0.4622959876440724	0.9634912147262152	NA	FALSE	FALSE
ribo	Ara-1	ECB_00306	8.022982098975325	-0.261570219443199	0.4946743629519078	0.2734369451769241	NA	FALSE	FALSE
ribo	Ara-1	ECB_00307	8.011195416897522	0.1880200157161817	0.4629175928721758	0.40597560739059485	NA	FALSE	FALSE
ribo	Ara-1	ECB_00308	80.48109184165949	-0.3953947495785929	0.3456403213471797	0.1314139056908293	0.4447358861002813	FALSE	FALSE
ribo	Ara-1	ECB_00309	22.755007536904046	0.40410772853874355	0.41905554756272795	0.15642393773419344	0.4792861546019609	FALSE	FALSE
ribo	Ara-1	ECB_00310	180.81254265341988	0.014398074828476942	0.28132208240440876	0.9519430325027604	0.9826684582580992	FALSE	FALSE
ribo	Ara-1	ECB_00311	28.203650895050323	0.27897706728512695	0.37233783450713964	0.29289175099573295	0.6596738092746395	FALSE	FALSE
ribo	Ara-1	ECB_00312	6.819557605504113	-0.26332544488926923	0.5234249968096667	0.22438307461289878	NA	FALSE	FALSE
ribo	Ara-1	ECB_00315	328.21443477584523	-1.3629955592096341	0.6156215272465213	0.0014876808658726834	0.021831533494752333	FALSE	FALSE
ribo	Ara-1	ECB_00316	74.46216633133967	-1.0140025107728787	0.7428830866556644	0.012076455240717989	0.10488559814022999	FALSE	FALSE
ribo	Ara-1	ECB_00317	86.61697356152595	-0.6441264499226222	0.5788209067188269	0.04656945009232576	0.2495150932105008	FALSE	FALSE
ribo	Ara-1	ECB_00318	232.53352146129774	-0.8416770657438302	0.4994819943463497	0.01275768245130186	0.10735914130629445	FALSE	FALSE
ribo	Ara-1	ECB_00319	568.2082565112519	0.09612831086481811	0.2734543714947052	0.6771736910231703	0.8842737679678444	FALSE	FALSE
ribo	Ara-1	ECB_00320	0	NA	NA	NA	NA	FALSE	FALSE
ribo	Ara-1	ECB_00321	21.312484662217532	-0.24205026175437816	0.4211202697867942	0.3471718882332197	0.7078884702578793	FALSE	FALSE
ribo	Ara-1	ECB_00322	0.8209861209245258	-0.08846272803321865	0.50094617011635445	0.3856715682082549	NA	FALSE	FALSE
ribo	Ara-1	ECB_00323	121.08772917500279	0.3638763446194276	0.3206526203141317	0.15536368030898287	0.4790692464575794	FALSE	FALSE
ribo	Ara-1	ECB_00324	60.030811798569545	-0.9163335024878854	0.41725879345847583	0.0046157615828143605	0.0539229559027607	FALSE	FALSE
ribo	Ara-1	ECB_00325	45.87292167370022	-0.5071223416631138	0.39479917270920023	0.07481774138390747	0.3224969573908699	FALSE	FALSE
ribo	Ara-1	ECB_00326	1.722181689272815	-0.08094603087866528	0.48733275701929124	0.5086974906980098	NA	FALSE	FALSE
ribo	Ara-1	ECB_00327	37.596586652495155	0.3806999555049095	0.4343074462671227	0.18415574767527212	0.5165724786484328	FALSE	FALSE
ribo	Ara-1	ECB_00328	285.5756179410848	-0.002760245061769989	0.2775264446416554	0.9887272158769289	0.9950916850746381	FALSE	FALSE
ribo	Ara-1	ECB_00329	32.21923792709779	0.6183956404486312	0.45106315753948456	0.04898328912986987	0.2578113397842444	FALSE	FALSE
ribo	Ara-1	ECB_00330	8.692140600999938	0.05185139956589656	0.4208377706126367	0.8183033688753671	0.9466025468786383	FALSE	FALSE
ribo	Ara-1	ECB_00331	10.3274841295023	0.07574823600185929	0.40965445483915786	0.7489866026549465	0.9226851433481728	FALSE	FALSE
ribo	Ara-1	ECB_00332	8.340962704452812	0.3345148662896804	0.5215682399404512	0.19279538163805301	NA	FALSE	FALSE
ribo	Ara-1	ECB_00333	172.23591564178082	0.33940008968708696	0.28965704884577426	0.1586371130186069	0.48370517879470826	FALSE	FALSE
ribo	Ara-1	ECB_00334	86.06437513337997	0.05151994274835711	0.32122264354828334	0.8353734260333605	0.9489654828247982	FALSE	FALSE
ribo	Ara-1	ECB_00335	108.88107970229848	0.2454067952763204	0.37917955748399673	0.3558825588179198	0.7124027452997602	FALSE	FALSE
ribo	Ara-1	ECB_00336	66.92379855979303	-0.15357785778002792	0.323297411849439	0.5332568859755139	0.8188516821242556	FALSE	FALSE
ribo	Ara-1	ECB_00337	17.657269687282433	0.5169505036625387	0.5826730938336023	0.10059938236647016	0.3871906460849026	FALSE	FALSE
ribo	Ara-1	ECB_00338	353.97188368614786	-0.049080223643802844	0.27585706563016626	0.8287279404666167	0.9484268248875608	FALSE	FALSE
ribo	Ara-1	ECB_00339	5.30256365205035	0.15455559744484793	0.4581358978617457	0.4755182017699652	NA	FALSE	FALSE
ribo	Ara-1	ECB_00342	220.31600384124926	0.12506579528776834	0.28751045949159576	0.5975375667134659	0.8537609101293459	FALSE	FALSE
ribo	Ara-1	ECB_00343	77.58997637677747	-0.2698462150097349	0.3261003558395082	0.2804464145562075	0.6456335927070651	FALSE	FALSE
ribo	Ara-1	ECB_00344	40.53514759405219	-0.3413903342394462	0.3739776949795888	0.20182648864475322	0.5421470781539404	FALSE	FALSE
ribo	Ara-1	ECB_00345	101.5804923392562	0.19336223713343964	0.2871943658886162	0.4147723701701703	0.7509471338948449	FALSE	FALSE
ribo	Ara-1	ECB_00346	58.762922123950645	0.2629781684319454	0.3656021524234986	0.31870443821906375	0.6858575829931816	FALSE	FALSE
ribo	Ara-1	ECB_00347	15.51736429040195	-0.31728773703830515	0.47769355959060217	0.22829501861940438	0.5838681160795489	FALSE	FALSE
ribo	Ara-1	ECB_00348	18.121237610710722	-0.024434234191435374	0.37574280706654367	0.9191751160809878	0.9744564664787411	FALSE	FALSE
ribo	Ara-1	ECB_00349	688.6193312477301	-0.5376375462061311	0.3397529457964366	0.041429600233985474	0.231121309170492	FALSE	FALSE
ribo	Ara-1	ECB_00350	176.84344871674125	-0.024590714284973253	0.27897771071879685	0.899011245216084	0.9679239107327312	FALSE	FALSE
ribo	Ara-1	ECB_00351	590.3489416980336	-2.5912300732953915	0.3272328124944442	1.057229990434165e-16	1.0498293805011258e-14	FALSE	TRUE
ribo	Ara-1	ECB_00353	326.84859041237064	0.9152416837820557	0.4213319827873988	0.00591703886255368	0.06409766826017241	FALSE	FALSE
ribo	Ara-1	ECB_00354	356.8228447127283	0.6600433000952878	0.3862387300490907	0.027266324437627762	0.1761960531446705	FALSE	FALSE
ribo	Ara-1	ECB_00355	1168.682185851198	0.10304814215693472	0.27227313955398075	0.6536622350109509	0.8785418259642632	FALSE	FALSE
ribo	Ara-1	ECB_00356	852.7096465861159	0.15954455920959737	0.28001967102679737	0.49502853361874394	0.7988813946440666	FALSE	FALSE
ribo	Ara-1	ECB_00357	523.6321143031983	-0.022326467719912563	0.2562738510055399	0.9175444284456691	0.9742761457015646	FALSE	FALSE
ribo	Ara-1	ECB_00358	108.63040144139691	-0.6216690166019995	0.4647351939145028	0.04425749326051365	0.2414708286136816	FALSE	FALSE
ribo	Ara-1	ECB_00359	460.7423004469427	0.8944488156798729	0.43027335940782824	0.007610091716439418	0.07633152600428629	FALSE	FALSE
ribo	Ara-1	ECB_00360	6.589671257482647	-0.05524823300787725	0.42979437784553787	0.798284364930799	NA	FALSE	FALSE
ribo	Ara-1	ECB_00361	82.89003626712089	0.03754933559050707	0.34372735108620905	0.8811208863038036	0.9639947629311393	FALSE	FALSE
ribo	Ara-1	ECB_00362	140.40565426249537	-0.2543584024567751	0.3267033190929554	0.30663790394204077	0.671672291061279	FALSE	FALSE
ribo	Ara-1	ECB_00363	715.960065930176	-0.11457077913330138	0.25613839174953307	0.5990982041664964	0.8538731620592478	FALSE	FALSE
ribo	Ara-1	ECB_00364	214.9382487573948	0.19470227639229942	0.3416814194377182	0.4480645387287082	0.7727578511739172	FALSE	FALSE
ribo	Ara-1	ECB_00365	125.15015301990947	0.14936894459884612	0.2732961475379501	0.5154562153757293	0.8104561270258305	FALSE	FALSE
ribo	Ara-1	ECB_00366	198.4807656071036	0.5949952566940965	0.3063013754378453	0.02034052304211204	0.1428759297980624	FALSE	FALSE
ribo	Ara-1	ECB_00367	84.26705743106663	0.008850717373157862	0.33597060640195103	0.9729814098163593	0.9886412229953744	FALSE	FALSE
ribo	Ara-1	ECB_00368	177.72481986953898	0.06920461586371046	0.3008980325290545	0.7749866521020339	0.9358270111925249	FALSE	FALSE
ribo	Ara-1	ECB_00369	133.13145730493983	0.07008032774139555	0.3156982143416761	0.7762284764290626	0.9360576901987279	FALSE	FALSE
ribo	Ara-1	ECB_00370	72.87054387930134	-0.20912673532281614	0.3773638576341926	0.4152354130870452	0.7510542171137266	FALSE	FALSE
ribo	Ara-1	ECB_00371	267.64110477327125	0.37720661374949993	0.377898378139872	0.17368207509166844	0.5065783415270646	FALSE	FALSE
ribo	Ara-1	ECB_00372	173.40509719854916	0.21488634701806605	0.31968821830620137	0.3916061419643757	0.7355578164639819	FALSE	FALSE
ribo	Ara-1	ECB_00373	81.20447627097812	-0.014231979098371966	0.31719949949880205	0.9519909938008977	0.9826684582580992	FALSE	FALSE
ribo	Ara-1	ECB_00374	538.0091057081341	0.5019607742196316	0.29062083642400455	0.040664097623084226	0.22770365943452614	FALSE	FALSE
ribo	Ara-1	ECB_00375	58.20175495995661	0.17630361525806232	0.32859171215432353	0.4836237902204095	0.792472646351265	FALSE	FALSE
ribo	Ara-1	ECB_00376	2.1450032892616586	0.08343460631914824	0.47574613998805876	0.605993446853186	NA	FALSE	FALSE
ribo	Ara-1	ECB_00377	41.34892706896832	-0.21780707386496584	0.3532474554244436	0.39408919142560345	0.7378954753343009	FALSE	FALSE
ribo	Ara-1	ECB_00378	23.896382766020384	-0.05405071435496364	0.3670631045621911	0.8256498076495439	0.9468828631948973	FALSE	FALSE
ribo	Ara-1	ECB_00379	532.9297975236138	-0.09496009615990483	0.256935453434349	0.6644188084548202	0.882071474892192	FALSE	FALSE
ribo	Ara-1	ECB_00380	490.56221105754116	-0.017706434429590717	0.25126278455923323	0.9336478077450219	0.9772168026934688	FALSE	FALSE
ribo	Ara-1	ECB_00381	1518.9813612631974	-0.018573015145513783	0.24277877981456406	0.928251055279342	0.976088914111246	FALSE	FALSE
ribo	Ara-1	ECB_00382	3114.7647753872343	0.1477473398133748	0.26892557641158643	0.5176878904000582	0.8104561270258305	FALSE	FALSE
ribo	Ara-1	ECB_00383	1574.4676654641519	0.1563826979640742	0.26654028226555615	0.4902240236312559	0.7964815342744055	FALSE	FALSE
ribo	Ara-1	ECB_00384	193.23876696939027	-0.15354986278217667	0.3550327244131813	0.5411566884973016	0.8262971681360644	FALSE	FALSE
ribo	Ara-1	ECB_00385	187.71585387988432	-0.21054932592518805	0.3080830835189765	0.3845633062964937	0.731235965020532	FALSE	FALSE
ribo	Ara-1	ECB_00386	95.60218729201675	0.10102244958139915	0.30265725914024433	0.6759910151151183	0.8842737679678444	FALSE	FALSE
ribo	Ara-1	ECB_00387	5332.240667295364	0.5569500196988769	0.3191826424753222	0.03404604837777071	0.20163653701268183	FALSE	FALSE
ribo	Ara-1	ECB_00388	1105.5598595705667	0.18794315549081328	0.24601163268098855	0.38278586180606816	0.7300378247889098	FALSE	FALSE
ribo	Ara-1	ECB_00389	1392.8604978718745	-0.23146144704562222	0.25686357269879595	0.28890364531142854	0.6544820983899206	FALSE	FALSE
ribo	Ara-1	ECB_00391	230.74301746680464	2.063528838362079	0.3110360545836421	3.512839376750291e-12	2.6832688470100303e-10	FALSE	TRUE
ribo	Ara-1	ECB_00392	3388.1260179084497	0.4470184820527655	0.287216055681369	0.06493949270765234	0.29716551271289754	FALSE	FALSE
ribo	Ara-1	ECB_00393	1163.8769112160135	0.2492888348014389	0.2668765598165417	0.2736292507039621	0.6381894268065927	FALSE	FALSE
ribo	Ara-1	ECB_00394	9.043405960400168	-0.1178385079591656	0.42768894401847235	0.6089685042072005	0.8559479958526618	FALSE	FALSE
ribo	Ara-1	ECB_00395	1.1400761438766436	-0.041828447402225674	0.4842454918841927	0.7285256150098094	NA	FALSE	FALSE
ribo	Ara-1	ECB_00396	156.02649243077133	-0.045019636034452436	0.27610425685540346	0.8429361074997751	0.9520747979174207	FALSE	FALSE
ribo	Ara-1	ECB_00397	17.990929798433456	-0.2698555389773606	0.43907544313217556	0.30209727091350885	0.6657660271683956	FALSE	FALSE
ribo	Ara-1	ECB_00398	30.377126290732825	-0.17831712349868076	0.3530831782079508	0.48270990217523646	0.7920274968632898	FALSE	FALSE
ribo	Ara-1	ECB_00399	44.528676709718766	0.02889426317157126	0.35260051370114276	0.908467878449717	0.9698180046650804	FALSE	FALSE
ribo	Ara-1	ECB_00400	64.79298669154684	-0.3791962488017244	0.3667984501345766	0.15613925330265693	0.4792861546019609	FALSE	FALSE
ribo	Ara-1	ECB_00401	65.79041510655178	0.020627667200213563	0.3083772947164231	0.9331443870019911	0.9772168026934688	FALSE	FALSE
ribo	Ara-1	ECB_00402	15.427438175642038	0.19628936548216436	0.526701158169636	0.21418263180512404	0.5587128372569742	FALSE	FALSE
ribo	Ara-1	ECB_00403	50.40359258455725	1.4310465169442363	0.851846559842933	0.007450667342427091	0.07575268946447203	FALSE	FALSE
ribo	Ara-1	ECB_00404	88.0156797831664	-0.9824464162898537	0.4491226587751336	0.0037501199661105255	0.046743127108967594	FALSE	FALSE
ribo	Ara-1	ECB_00405	34.81747463000122	-0.9925378206254727	0.522292523526048	0.007503237592737457	0.07602770336314586	FALSE	FALSE
ribo	Ara-1	ECB_00406	58.49494483448763	-0.8908158495910609	0.46611038191909776	0.008377083390604898	0.0802422232174019	FALSE	FALSE
ribo	Ara-1	ECB_00407	2.089592784887552	-0.2053320459327597	0.5448068965786255	0.08020435608922973	NA	FALSE	FALSE
ribo	Ara-1	ECB_00408	37.56132930419532	-0.08636851441823055	0.3499130781249801	0.7278940415227537	0.9122407865781587	FALSE	FALSE
ribo	Ara-1	ECB_00409	26.503014274434285	-0.2598800580514732	0.3852797143774314	0.3225422098176592	0.6873056101908489	FALSE	FALSE
ribo	Ara-1	ECB_00410	25.455409838453136	1.0714647029333093	0.5353486887148825	0.0057484029676214575	0.06295769279611883	FALSE	FALSE
ribo	Ara-1	ECB_00411	125.88439512485982	-0.12540448573068128	0.3135257898910933	0.6055970168926879	0.8548734829175411	FALSE	FALSE
ribo	Ara-1	ECB_00412	29.096327580467808	0.07413570056171763	0.36151075565725116	0.7663406713554535	0.9307985669768777	FALSE	FALSE
ribo	Ara-1	ECB_00413	1303.323262047604	-0.1256790975430772	0.24409523510300948	0.5513289076962089	0.830338127415069	FALSE	FALSE
ribo	Ara-1	ECB_00414	647.301513446752	-0.2504969490755026	0.2913581632937262	0.2876443121004591	0.6544192774092779	FALSE	FALSE
ribo	Ara-1	ECB_00415	71.30983215576437	-0.16569337039388848	0.30329342964462713	0.49061551372726886	0.7964815342744055	FALSE	FALSE
ribo	Ara-1	ECB_00416	374.5855787088774	-0.01875204419525656	0.29912966324370277	0.9355176058769541	0.9772168026934688	FALSE	FALSE
ribo	Ara-1	ECB_00417	20.79899610746536	-0.2528709195101121	0.40348031009069424	0.3374754891219677	0.696047254098899	FALSE	FALSE
ribo	Ara-1	ECB_00418	36.75296627479427	0.025719075752277415	0.35225047034059764	0.9185245398480747	0.9742761457015646	FALSE	FALSE
ribo	Ara-1	ECB_00419	55.50109268804419	-0.03558505636610595	0.3740153116692785	0.8825668352404631	0.9641241665498128	FALSE	FALSE
ribo	Ara-1	ECB_00420	337.4302013684221	0.21053753343444848	0.33630801486245	0.41085879729833497	0.7498392292438227	FALSE	FALSE
ribo	Ara-1	ECB_00421	327.6379628276658	0.203847277746151	0.2661020556513974	0.36807084527081313	0.7145872803348582	FALSE	FALSE
ribo	Ara-1	ECB_00422	512.6067346802267	0.11175357590956253	0.2518835255634981	0.6089362460576939	0.8559479958526618	FALSE	FALSE
ribo	Ara-1	ECB_00423	245.90682906409447	0.4811344284222692	0.2943642747787706	0.05073969545002681	0.2615113369301555	FALSE	FALSE
ribo	Ara-1	ECB_00424	1637.5472586473486	-0.30088477053456403	0.40793688250344456	0.25391913284619994	0.6126716194994707	FALSE	FALSE
ribo	Ara-1	ECB_00425	1437.0123311067207	0.24947601748867265	0.3314684813848442	0.32977424103724406	0.69107571005465	FALSE	FALSE
ribo	Ara-1	ECB_00426	108.41625541706733	0.05307067629529382	0.28577033057594303	0.8218208992412694	0.9468828631948973	FALSE	FALSE
ribo	Ara-1	ECB_00427	6.094517644453892	-0.2861563289667649	0.5372003260310024	0.20779222950994466	NA	FALSE	FALSE
ribo	Ara-1	ECB_00428	254.21975440703972	0.5278129800122607	0.41204491489203793	0.0770981718304927	0.3285771872432586	FALSE	FALSE
ribo	Ara-1	ECB_00430	74.99625567724472	-0.8090740319464916	0.47869307392926413	0.014817400905754199	0.11646711688190438	FALSE	FALSE
ribo	Ara-1	ECB_00431	182.81126023661997	0.1675409803271231	0.2894108449956408	0.4794705956808908	0.7909447143156204	FALSE	FALSE
ribo	Ara-1	ECB_00432	134.57308639452333	-0.07977578454174983	0.2845412064505485	0.7305909968214239	0.9127821136198506	FALSE	FALSE
ribo	Ara-1	ECB_00433	40.20105771591375	-0.11442464660833293	0.34412915118173726	0.6455674623834418	0.8753506920529235	FALSE	FALSE
ribo	Ara-1	ECB_00434	87.41580730708927	-0.21437623642868706	0.3373186394979939	0.3930165851706236	0.7368133462701622	FALSE	FALSE
ribo	Ara-1	ECB_00435	848.543262996993	0.37040439665943625	0.40010159950013746	0.18839888535577115	0.52275063533331	FALSE	FALSE
ribo	Ara-1	ECB_00436	10.152696214410197	-0.7598984562305675	0.8187866656159003	0.04487978809262618	0.24308525223260616	FALSE	FALSE
ribo	Ara-1	ECB_00437	9.938883658507294	-0.34096642894402635	0.548892808931963	0.16657590704513744	0.49626962148339165	FALSE	FALSE
ribo	Ara-1	ECB_00438	101.10845889283783	0.09301015451804823	0.32568567496418427	0.7079086888595384	0.903948711522951	FALSE	FALSE
ribo	Ara-1	ECB_00439	39.29099734743597	0.20777065778763934	0.3691515981158964	0.4223840954027606	0.7568157698136577	FALSE	FALSE
ribo	Ara-1	ECB_00440	43.56256916022361	-0.0051552299841025745	0.3434429147673001	0.9820044531892362	0.9917733896612967	FALSE	FALSE
ribo	Ara-1	ECB_00441	39.95046158050891	0.6059423190391938	0.44595846853325116	0.051969226423782475	0.2653067404386396	FALSE	FALSE
ribo	Ara-1	ECB_00442	24.99200645017755	-0.03388261742463919	0.39117206972095	0.8869563233942699	0.9660088368285906	FALSE	FALSE
ribo	Ara-1	ECB_00443	522.1676924918613	0.10019791922107156	0.27676869683857014	0.6557611948212239	0.8789700763668218	FALSE	FALSE
ribo	Ara-1	ECB_00444	116.45470311145073	0.05054276287039127	0.2992054465164502	0.8342188120196179	0.948525893513909	FALSE	FALSE
ribo	Ara-1	ECB_00445	94.72226961542906	-0.175315388284959	0.32670321187472595	0.47730140962814654	0.789122952137779	FALSE	FALSE
ribo	Ara-1	ECB_00446	38.05918557347371	-0.1400255887837438	0.3842082052988076	0.5762070167695297	0.843913816596081	FALSE	FALSE
ribo	Ara-1	ECB_00447	65.04512822994776	0.2847831871370165	0.3452835625675689	0.27463637992666867	0.6391732623449577	FALSE	FALSE
ribo	Ara-1	ECB_00448	28.629445926893087	0.20750890348944476	0.3759454826661847	0.42333422821609	0.7568157698136577	FALSE	FALSE
ribo	Ara-1	ECB_00449	15.225531978092784	-0.08924891973470646	0.3895795563872732	0.7154104943698512	0.908699102330625	FALSE	FALSE
ribo	Ara-1	ECB_00450	11.660645116328961	-0.02561441306221937	0.42269973411408124	0.9067950587433556	0.9696132376153828	FALSE	FALSE
ribo	Ara-1	ECB_00451	0	NA	NA	NA	NA	FALSE	FALSE
ribo	Ara-1	ECB_00452	63.78549513380905	-0.2727215822210086	0.3652366965688027	0.2951003831612595	0.6604838778643066	FALSE	FALSE
ribo	Ara-1	ECB_00453	18.240263132853098	0.09793925879539973	0.3744671728079755	0.696459678550801	0.8976836911225864	FALSE	FALSE
ribo	Ara-1	ECB_00454	1.1134177389166542	0.0738289392920621	0.4897938637250788	0.5142311032919159	NA	FALSE	FALSE
ribo	Ara-1	ECB_00455	3.016044528247383	0.04274544891527995	0.45885222769097433	0.8102409316126278	NA	FALSE	FALSE
ribo	Ara-1	ECB_00456	340.58840426056474	-0.10075498393047504	0.27258069122730605	0.6559081838749394	0.8789700763668218	FALSE	FALSE
ribo	Ara-1	ECB_00457	11.236144808717075	-0.1108122098606519	0.41011520830005416	0.6443167987008886	0.8752484009712482	FALSE	FALSE
ribo	Ara-1	ECB_00458	2.595676663714984	0.10960575479289643	0.47948419397751474	0.5055569910445998	NA	FALSE	FALSE
ribo	Ara-1	ECB_00459	2.107327155649887	0.017308721068455823	0.46722649704718344	0.9139855858979382	NA	FALSE	FALSE
ribo	Ara-1	ECB_00460	0	NA	NA	NA	NA	FALSE	FALSE
ribo	Ara-1	ECB_00461	0.8805010722990365	-0.013983103754009237	0.4843019769188601	0.9139454120076481	NA	FALSE	FALSE
ribo	Ara-1	ECB_00462	1.6267594425837062	-0.08690861008691525	0.48673276890505024	0.5015666011027798	NA	FALSE	FALSE
ribo	Ara-1	ECB_00463	6.1406584073069315	0.060486334138673055	0.4335306833277322	0.7819398890440526	NA	FALSE	FALSE
ribo	Ara-1	ECB_00464	8.35563975896866	0.08238723587723498	0.42447717855374967	0.715889321361484	NA	FALSE	FALSE
ribo	Ara-1	ECB_00465	22.69553079086705	0.07337353375012971	0.3561367480831181	0.7700983786677573	0.9325703536793695	FALSE	FALSE
ribo	Ara-1	ECB_00466	15.513871100044328	0.07530342464619774	0.3832792467606897	0.7598285354468597	0.9277919968048076	FALSE	FALSE
ribo	Ara-1	ECB_00467	0.23704071016955627	0.050270926756183304	0.4975260952212538	0.5551697148968201	NA	FALSE	FALSE
ribo	Ara-1	ECB_00468	1.051831268326082	-0.031036092210311915	0.48388821214499145	0.7959145318778619	NA	FALSE	FALSE
ribo	Ara-1	ECB_00469	5.769512142206802	-0.17287159882817088	0.4770424686315222	0.41054904416465104	NA	FALSE	FALSE
ribo	Ara-1	ECB_00470	0.9831121992808894	0.09381200918345811	0.495374147744851	0.40227464396172585	NA	FALSE	FALSE
ribo	Ara-1	ECB_00471	2.101022782690539	0.06560676790877984	0.47801075868538434	0.6464497677429093	NA	FALSE	FALSE
ribo	Ara-1	ECB_00472	522.2386097727983	0.33951951737517655	0.5871149959829781	0.14512587627633866	0.4643658583036907	FALSE	FALSE
ribo	Ara-1	ECB_00473	151.15245109484397	0.7866160314867632	0.7041302687157546	0.04023781592860022	0.22616689368169823	FALSE	FALSE
ribo	Ara-1	ECB_00474	43.101763260068374	0.1487557353018283	0.3256315244402509	0.5513076417810479	0.830338127415069	FALSE	FALSE
ribo	Ara-1	ECB_00475	1753.2018126027228	0.162676421604904	0.26585476168397143	0.47208569800547157	0.789122952137779	FALSE	FALSE
ribo	Ara-1	ECB_00476	531.2486954353016	0.46445913769950176	0.30224167782467204	0.06406495909214426	0.2964172783130994	FALSE	FALSE
ribo	Ara-1	ECB_00477	2.1347258769391146	0.048194531041717996	0.47152703262799955	0.7528958667073545	NA	FALSE	FALSE
ribo	Ara-1	ECB_00478	115.01038031874208	0.3384494463786736	0.2975544354778401	0.16577604404858912	0.49626962148339165	FALSE	FALSE
ribo	Ara-1	ECB_00479	496.5090584902938	0.8500489135086499	0.42592937895556393	0.009938175190361236	0.09137599966693248	FALSE	FALSE
ribo	Ara-1	ECB_00480	0.43359425948403646	-0.052124698078401796	0.49575289339288436	0.6771289219079948	NA	FALSE	FALSE
ribo	Ara-1	ECB_00481	0.30863069086185335	-0.030823093730167676	0.4949314989652458	0.9037246154209962	NA	FALSE	FALSE
ribo	Ara-1	ECB_00482	1.4564155201610405	-0.17167530924200122	0.5256065046362935	0.14293978352578782	NA	FALSE	FALSE
ribo	Ara-1	ECB_00483	0.9805812555106123	0.21166716362829996	0.5486222891128701	0.0921338872142941	NA	FALSE	FALSE
ribo	Ara-1	ECB_00484	1.1509358244193189	0.08095403608059741	0.4894317248532984	0.4976129081446167	NA	FALSE	FALSE
ribo	Ara-1	ECB_00485	0.6863204186457267	-0.05831329306843606	0.4970457126311448	0.5516496506271423	NA	FALSE	FALSE
ribo	Ara-1	ECB_00486	91.53797861981406	0.2407371645238918	0.35446365362428456	0.3577745419014273	0.7124027452997602	FALSE	FALSE
ribo	Ara-1	ECB_00487	0.0952580173277935	-0.014337373997168897	0.49478815040893903	0.9268960539205255	NA	FALSE	FALSE
ribo	Ara-1	ECB_00488	1.5059092710274211	0.07676041871668578	0.48328865484139766	0.5790601161977232	NA	FALSE	FALSE
ribo	Ara-1	ECB_00489	1.1155483342345203	-0.03876868818587707	0.48452602326141764	0.7440591814458989	NA	FALSE	FALSE
ribo	Ara-1	ECB_00490	1.5583311034975817	0.03227743890291266	0.47861586446457777	0.8003123568729231	NA	FALSE	FALSE
ribo	Ara-1	ECB_00492	4.207543005817235	-0.0856341552177762	0.45785926035434527	0.6547638642084594	NA	FALSE	FALSE
ribo	Ara-1	ECB_00493	17.950076551084447	-0.18436801838279981	0.39454522594463903	0.46925377325556034	0.7866694040385083	FALSE	FALSE
ribo	Ara-1	ECB_00494	0.5753769523257992	0.020440815013766364	0.4866458832535007	0.8087671444168414	NA	FALSE	FALSE
ribo	Ara-1	ECB_00495	11.447632789842249	-0.3553945715390611	0.5272641379550997	0.17846578921015413	0.5107992069950409	FALSE	FALSE
ribo	Ara-1	ECB_00496	7.388080823001727	0.005594905143718574	0.41975402112838534	0.9810221442496367	NA	FALSE	FALSE
ribo	Ara-1	ECB_00497	0.24658479571706546	-0.021548458070208113	0.4951120507768313	0.9265687553134567	NA	FALSE	FALSE
ribo	Ara-1	ECB_00498	0	NA	NA	NA	NA	FALSE	FALSE
ribo	Ara-1	ECB_00499	0.5849210378733084	-0.06569327066144029	0.4972597069495526	0.545553424194686	NA	FALSE	FALSE
ribo	Ara-1	ECB_00500	1.1277165658519974	0.05905774584617505	0.4881190024173674	0.581995621944998	NA	FALSE	FALSE
ribo	Ara-1	ECB_00501	0.11978582696991673	-0.015486934392861557	0.49481958137768434	0.9268960539205255	NA	FALSE	FALSE
ribo	Ara-1	ECB_00502	1.2380293343360294	-0.11327962504670734	0.5071035655253828	0.253611704447043	NA	FALSE	FALSE
ribo	Ara-1	ECB_00514	9.745064320069055	-0.5685288267073264	0.72606526517635706	0.0700178649249912	0.3088898615301059	FALSE	FALSE
ribo	Ara-1	ECB_00515	6.366331974710601	-0.7952673092119054	1.1483721964176212	0.04394957747570442	NA	FALSE	FALSE
ribo	Ara-1	ECB_00516	5.914049892583956	-0.2621603047680594	0.5110988839091831	0.25345618585237806	NA	FALSE	FALSE
ribo	Ara-1	ECB_00517	3.737487961496538	-0.602158780594018	1.077849569903517	0.012008568122588416	NA	FALSE	FALSE
ribo	Ara-1	ECB_00518	13.947663008475823	-0.19263622493800614	0.4300347321161617	0.43429178927968354	0.7641791141548596	FALSE	FALSE
ribo	Ara-1	ECB_00519	2251.1367921116534	-0.442736192248218	0.28074137855119696	0.05737764512934993	0.2788385070804787	FALSE	FALSE
ribo	Ara-1	ECB_00520	5.585081997459711	-0.5150683991656642	0.7712828696645889	0.07360156910323801	NA	FALSE	FALSE
ribo	Ara-1	ECB_00521	4.504696543473091	-0.20398451862506253	0.4961953152110629	0.32100954821642913	NA	FALSE	FALSE
ribo	Ara-1	ECB_00522	16.12180943836008	0.027063432454098445	0.3774873435969808	0.9134102606583763	0.9721504703470178	FALSE	FALSE
ribo	Ara-1	ECB_00524	2.014782001860091	-0.014459429672695475	0.47217588296880525	0.9182098018776713	NA	FALSE	FALSE
ribo	Ara-1	ECB_00525	0.8708593192180042	-0.0738586622023708	0.49926161775309746	0.4264729935440134	NA	FALSE	FALSE
ribo	Ara-1	ECB_00526	0	NA	NA	NA	NA	FALSE	FALSE
ribo	Ara-1	ECB_00527	0.23704071016955627	0.050270926756183304	0.4975260952212538	0.5551697148968201	NA	FALSE	FALSE
ribo	Ara-1	ECB_00528	0.33833624215624297	-0.04139223612800793	0.4950384994304783	0.7905373531115765	NA	FALSE	FALSE
ribo	Ara-1	ECB_00529	0.35935748090975017	-0.029933273176603315	0.49532088690383214	0.8206106697943301	NA	FALSE	FALSE
ribo	Ara-1	ECB_00530	0.190516034655587	-0.019486400556278077	0.49500792072779093	0.9685250789172494	NA	FALSE	FALSE
ribo	Ara-1	ECB_00531	40.72881082206203	-0.4944231412475868	0.44901195650747155	0.09361265410622105	0.36985689201914124	FALSE	FALSE
ribo	Ara-1	ECB_00533	243.36610489205904	-4.501073650833601	0.5471945846918914	7.040560010518413e-18	9.987537272063978e-16	FALSE	TRUE
ribo	Ara-1	ECB_00534	135.43866777115045	-1.643755745097282	0.9538847783508473	0.002576151682796678	0.03426051724576475	FALSE	FALSE
ribo	Ara-1	ECB_00535	58.89861827356067	-3.4678381736578476	0.6626611760935772	1.8787809433136046e-8	8.610597584817274e-7	FALSE	TRUE
ribo	Ara-1	ECB_00536	127.72494973005666	-3.9008192871111134	0.6126747394942609	1.7248745249166386e-11	1.1678184567560604e-9	FALSE	TRUE
ribo	Ara-1	ECB_00537	130.71261593210883	1.3083423605813675	0.5049795601971342	0.0011911535543923867	0.01857825360489487	FALSE	FALSE
ribo	Ara-1	ECB_00538	85.69974154970615	-0.24172688222061356	0.3135186722563107	0.32510667418229205	0.6896916829255694	FALSE	FALSE
ribo	Ara-1	ECB_00539	334.1779144837859	0.424000258468261	0.28292978906085225	0.07609049547483349	0.32558826009713193	FALSE	FALSE
ribo	Ara-1	ECB_00540	25.335413350476284	-0.31791741807503404	0.4466495335812992	0.2352169866899051	0.5938232231773112	FALSE	FALSE
ribo	Ara-1	ECB_00541	19.461176843302866	0.02144120977729608	0.36644279139595565	0.9322177701889666	0.9772168026934688	FALSE	FALSE
ribo	Ara-1	ECB_00542	23.497324312457117	-0.6135883810331824	0.5835360120669539	0.05938350267525872	0.28435602797755116	FALSE	FALSE
ribo	Ara-1	ECB_00547	0	NA	NA	NA	NA	FALSE	FALSE
ribo	Ara-1	ECB_00549	315.73381001081754	-0.14989565940568236	0.4989868163429947	0.3341577545233253	0.694753148952078	FALSE	FALSE
ribo	Ara-1	ECB_00550	13022.634031082682	-0.07959120354256122	0.47066677777437904	0.6253026381719686	0.8644855636950306	FALSE	FALSE
ribo	Ara-1	ECB_00551	245.21968168999652	-0.13553714063386346	0.49503526853843255	0.3689275720560631	0.7145872803348582	FALSE	FALSE
ribo	Ara-1	ECB_00552	137.30621450978424	-0.08791677350726244	0.47456120256943585	0.5850688082786206	0.848689622321252	FALSE	FALSE
ribo	Ara-1	ECB_00553	1375.9951568892627	-0.3352389577863898	0.5227020010597474	0.17960461497504224	0.5107992069950409	FALSE	FALSE
ribo	Ara-1	ECB_00554	20.790804148115736	-0.30549074342704574	0.5473443925573271	0.16922367975551533	0.4996207551949258	FALSE	FALSE
ribo	Ara-1	ECB_00555	245.80797182884032	-0.8881025568583705	0.6338829950189971	0.01576564170482286	0.12042524779145462	FALSE	FALSE
ribo	Ara-1	ECB_00556	119.30889075485506	-0.4477779818468301	0.4990180068487388	0.11646728195992208	0.4194553421189839	FALSE	FALSE
ribo	Ara-1	ECB_00557	97.37109130023153	-0.4430858544765203	0.5550764820161195	0.1122163751836313	0.41337041254577556	FALSE	FALSE
ribo	Ara-1	ECB_00558	149.79952508456324	-0.08754085692925782	0.4197584361222318	0.6992060957212196	0.8993674262320868	FALSE	FALSE
ribo	Ara-1	ECB_00559	256.49739045494107	-0.2778517779139836	0.47810191394768803	0.2594108242264753	0.6202125564772633	FALSE	FALSE
ribo	Ara-1	ECB_00560	447.62393625969577	0.04530556417516309	0.473694086556957	0.7673972143322874	0.9307985669768777	FALSE	FALSE
ribo	Ara-1	ECB_00561	709.5269595457182	0.06308481422177684	0.47335598226445125	0.6977692506937188	0.8982949860918704	FALSE	FALSE
ribo	Ara-1	ECB_00562	2343.4661094939916	0.004842877791968904	0.4660578869374937	0.9851586581383811	0.992488211902008	FALSE	FALSE
ribo	Ara-1	ECB_00563	596.7582254880808	-0.02251187833185616	0.4652442131570788	0.8819809943627275	0.9639947629311393	FALSE	FALSE
ribo	Ara-1	ECB_00564	345.67012946545765	-0.010722046510903171	0.46576940440085646	0.939979667492731	0.9783682058283399	FALSE	FALSE
ribo	Ara-1	ECB_00566	23.467112270339992	-0.5758479098077333	0.5134123052518533	0.06938260414242146	0.3073693539276574	FALSE	FALSE
ribo	Ara-1	ECB_00567	41.70110702787654	0.14898223693945783	0.38241715975672846	0.557749529915301	0.834104342177551	FALSE	FALSE
ribo	Ara-1	ECB_00568	22.061522952694514	0.19432893103939858	0.3853823160292598	0.4525219992671773	0.776981576839724	FALSE	FALSE
ribo	Ara-1	ECB_00569	9.73034833654088	0.14603651165412884	0.4234346143181955	0.5460948149037665	0.8300083946930207	FALSE	FALSE
ribo	Ara-1	ECB_00570	3.3164139068327865	-0.05320247082305462	0.4652814967427914	0.7481872099344087	NA	FALSE	FALSE
ribo	Ara-1	ECB_00573	61.83079134741359	-0.3361286634120615	0.35610866972978583	0.1999482291226538	0.5399232475523332	FALSE	FALSE
ribo	Ara-1	ECB_00574	5856.074924619959	0.5238097053260582	0.37020991440556505	0.06521258955657779	0.2979575219157135	FALSE	FALSE
ribo	Ara-1	ECB_00575	998.4949586397106	0.0358807539104743	0.24883458913199497	0.8693512710557983	0.9614894369545474	FALSE	FALSE
ribo	Ara-1	ECB_00576	56.44812581252124	-0.20090329127712103	0.36482339347432763	0.43100859415349385	0.7633904648384839	FALSE	FALSE
ribo	Ara-1	ECB_00577	5.839473146132843	-0.39241342406491436	0.6184174184786534	0.12345113889544655	NA	FALSE	FALSE
ribo	Ara-1	ECB_00578	113.62313766795738	0.5871008386723359	0.39962682674479494	0.04935822352533037	0.25841502263964705	FALSE	FALSE
ribo	Ara-1	ECB_00579	116.38556529219	-0.08240921611317333	0.3051647307628744	0.7309441037027515	0.9127821136198506	FALSE	FALSE
ribo	Ara-1	ECB_00580	31.48533836137481	0.039511260948466	0.40281656976497215	0.8691455095766241	0.9614894369545474	FALSE	FALSE
ribo	Ara-1	ECB_00581	7.715970958240279	0.021784027914012526	0.4348718011097015	0.9176502387097132	NA	FALSE	FALSE
ribo	Ara-1	ECB_00582	1.085383358385915	0.07893626883905043	0.4905673747129131	0.49181675810414616	NA	FALSE	FALSE
ribo	Ara-1	ECB_00583	13.601848495309879	-0.6859102550419581	0.6731829362000858	0.05201045196917272	0.2653067404386396	FALSE	FALSE
ribo	Ara-1	ECB_00584	4.161638381653121	0.10509859654778479	0.4571084371751264	0.5968780844598032	NA	FALSE	FALSE
ribo	Ara-1	ECB_00585	2.684205225304249	-0.1020087878795555	0.4841079376667615	0.5058212728827141	NA	FALSE	FALSE
ribo	Ara-1	ECB_00586	2.1446810117912363	0.004361281166142636	0.4690852323790448	0.9782110620276228	NA	FALSE	FALSE
ribo	Ara-1	ECB_00589	5.421044530511141	-0.18953443009371118	0.4844333476529932	0.364109701607077	NA	FALSE	FALSE
ribo	Ara-1	ECB_00590	20.333264872229147	-0.10184430931245378	0.37913833944455816	0.6818087513502256	0.8857864240175848	FALSE	FALSE
ribo	Ara-1	ECB_00591	6.849491894388627	0.22145010216530647	0.46882389748049297	0.35321436389421823	NA	FALSE	FALSE
ribo	Ara-1	ECB_00592	8.957642294530341	-0.2616315706710621	0.4805834134347299	0.28807233507033453	0.6544192774092779	FALSE	FALSE
ribo	Ara-1	ECB_00593	65.70469159444335	-0.9877693764797978	0.6091504629109467	0.01051442640284719	0.09478485486415356	FALSE	FALSE
ribo	Ara-1	ECB_00594	92.14122973568274	-0.36033212115827284	0.39983996756221907	0.18532911172824526	0.5176798629695026	FALSE	FALSE
ribo	Ara-1	ECB_00595	19.504260573123865	-0.8586698672159851	0.6651277997853832	0.02555017686654267	0.16914217085651248	FALSE	FALSE
ribo	Ara-1	ECB_00596	1539.723343243176	-0.741770538069881	0.4153101833680354	0.014736085527746327	0.11644984436876019	FALSE	FALSE
ribo	Ara-1	ECB_00597	671.9332173511757	-0.6844401199916962	0.4672357896214378	0.028641497487774437	0.18000637345164566	FALSE	FALSE
ribo	Ara-1	ECB_00598	3.981635015743017	-0.06630736250279447	0.45839758998245195	0.7198336605261827	NA	FALSE	FALSE
ribo	Ara-1	ECB_00599	77.52214188063726	0.1696443479229622	0.31913038122250625	0.49531182809922497	0.7988813946440666	FALSE	FALSE
ribo	Ara-1	ECB_00600	206.21048877668616	-0.20482916723241823	0.36304130168876264	0.41915695498764993	0.7535718581220333	FALSE	FALSE
ribo	Ara-1	ECB_00601	536.5477581974783	0.07865036169181154	0.2936365144750348	0.7423510913033899	0.9205846876790773	FALSE	FALSE
ribo	Ara-1	ECB_00602	157.13756895502797	-0.09188538576476298	0.2776726447422499	0.6879836364294956	0.8891554242618079	FALSE	FALSE
ribo	Ara-1	ECB_00603	100.890440465031	0.19919590630683348	0.28765921291713475	0.401176919867688	0.7432823285345553	FALSE	FALSE
ribo	Ara-1	ECB_00604	102.07348554720392	0.43364351042244	0.36509489646313537	0.11658577484878101	0.4194553421189839	FALSE	FALSE
ribo	Ara-1	ECB_00605	139.50187378191174	0.3487574746927295	0.3665839856018249	0.19909872793224256	0.5391955550092278	FALSE	FALSE
ribo	Ara-1	ECB_00606	187.50429613183871	0.058981894058402394	0.3339801783935165	0.8141241345124661	0.9466025468786383	FALSE	FALSE
ribo	Ara-1	ECB_00607	22.126344474671967	-0.051178186653240115	0.3689268662640614	0.8352068963186385	0.9489654828247982	FALSE	FALSE
ribo	Ara-1	ECB_00608	41.194831762032905	0.06518548660178469	0.3349077916078759	0.7939793086893282	0.9419496083189345	FALSE	FALSE
ribo	Ara-1	ECB_00609	66.45087317237423	0.060249889739287	0.30436686737004354	0.8034758173045866	0.9441293020996605	FALSE	FALSE
ribo	Ara-1	ECB_00610	366.3016997513721	-0.23598374301706498	0.33116172834281304	0.3444822230528446	0.7057857926234002	FALSE	FALSE
ribo	Ara-1	ECB_00611	1935.6222236021272	-0.008447206718718856	0.26101609061900266	0.9672691229753968	0.9871817148088036	FALSE	FALSE
ribo	Ara-1	ECB_00612	134.42501895071487	-0.03728183906190915	0.3512097283548588	0.8790622502311369	0.9639947629311393	FALSE	FALSE
ribo	Ara-1	ECB_00614	0.6327719548684846	0.03705385855102592	0.48943765410977497	0.6586710552014394	NA	FALSE	FALSE
ribo	Ara-1	ECB_00615	6.391809157093365	0.039417605454124253	0.427774223651923	0.85675683253324	NA	FALSE	FALSE
ribo	Ara-1	ECB_00616	4.604249877634502	-0.031523967295920545	0.44452770306435874	0.8722790392472421	NA	FALSE	FALSE
ribo	Ara-1	ECB_00617	90.29464172282925	1.0514409867970114	0.38344949090855024	0.0010449489599537094	0.016807534321206175	FALSE	FALSE
ribo	Ara-1	ECB_00621	54.13525247745956	0.3468310831356231	0.3930612224927596	0.211355005179459	0.5554187303332827	FALSE	FALSE
ribo	Ara-1	ECB_00622	57.64362234289161	0.36427442509326874	0.36400826738954273	0.1798311142713939	0.5107992069950409	FALSE	FALSE
ribo	Ara-1	ECB_00623	561.9207975261401	0.5708956815481293	0.2775404311497742	0.017105969913338497	0.12803689540662158	FALSE	FALSE
ribo	Ara-1	ECB_00624	6.7778148926488475	0.022945864916483805	0.43402162080272577	0.9148251821965983	NA	FALSE	FALSE
ribo	Ara-1	ECB_00625	175.32148654086086	0.09453609463429813	0.31071323842492565	0.7044898534218037	0.9030444377554016	FALSE	FALSE
ribo	Ara-1	ECB_00626	235.90639859236808	-0.05171496497408956	0.2634917425401372	0.8150886181302099	0.9466025468786383	FALSE	FALSE
ribo	Ara-1	ECB_00627	129.42059915100185	-0.2157395571718637	0.3121780592094478	0.376708637199564	0.7216816914582	FALSE	FALSE
ribo	Ara-1	ECB_00628	482.717797282995	-0.21371060081683926	0.2754567841000899	0.3481157560338666	0.7089199473061216	FALSE	FALSE
ribo	Ara-1	ECB_00629	575.8911681308691	0.7789011133469075	0.3904876507410856	0.011656730530051685	0.102434808994171	FALSE	FALSE
ribo	Ara-1	ECB_00630	159.15064405871638	0.018749329685285778	0.29497749029940257	0.9377741705431709	0.9776608055660853	FALSE	FALSE
ribo	Ara-1	ECB_00631	1264.2495244636955	0.1500289688774092	0.2771008207773371	0.5187732502765077	0.8104561270258305	FALSE	FALSE
ribo	Ara-1	ECB_00632	360.92129687078227	-0.6999027487550156	0.3386396041860872	0.009710305033025017	0.08983539966888673	FALSE	FALSE
ribo	Ara-1	ECB_00633	200.31221415878736	-0.3851262944337156	0.3020726921616786	0.11283972277742646	0.41397725881028746	FALSE	FALSE
ribo	Ara-1	ECB_00634	201.94327014610292	0.18786728964688532	0.2700139929849074	0.4109197529794649	0.7498392292438227	FALSE	FALSE
ribo	Ara-1	ECB_00635	219.2816341759501	1.5370463940521695	0.4045471074504173	1.75558655757007e-5	4.8424929212974435e-4	FALSE	TRUE
ribo	Ara-1	ECB_00636	467.9388858741685	-0.03679171317275059	0.2653009681802529	0.867901323354108	0.9614894369545474	FALSE	FALSE
ribo	Ara-1	ECB_00637	1105.929110222588	0.02749672059895349	0.2677360218758653	0.9073959485573994	0.9698180046650804	FALSE	FALSE
ribo	Ara-1	ECB_00638	3.5034611537294804	0.1200286732489479	0.4661633375762698	0.5395514590067103	NA	FALSE	FALSE
ribo	Ara-1	ECB_00639	0.7361874356869966	0.002441747731275793	0.48483111474645174	0.9577477932743366	NA	FALSE	FALSE
ribo	Ara-1	ECB_00640	598.8689613187486	-0.14241347625471193	0.2690453317017002	0.5261215633946608	0.8147153351311076	FALSE	FALSE
ribo	Ara-1	ECB_00641	1809.4739442631603	-0.15668349756613434	0.2686245559875614	0.4859055057232501	0.7938663129431094	FALSE	FALSE
ribo	Ara-1	ECB_00642	36.67084219078312	0.03217972516666444	0.34824026467467667	0.8984602526796023	0.9679239107327312	FALSE	FALSE
ribo	Ara-1	ECB_00643	77.32868081409396	-0.22602969551351357	0.31434370136366907	0.357532120203026	0.7124027452997602	FALSE	FALSE
ribo	Ara-1	ECB_00644	204.38196055711413	-0.3815889344443051	0.37090676967768454	0.1532960653940052	0.47679373567498073	FALSE	FALSE
ribo	Ara-1	ECB_00645	1012.0998731759826	-0.10288264047643664	0.24357875586810954	0.6253663611154048	0.8644855636950306	FALSE	FALSE
ribo	Ara-1	ECB_00646	5.1536795765372805	-0.29981176843303664	0.5479414687102796	0.19015702945403068	NA	FALSE	FALSE
ribo	Ara-1	ECB_00647	2.7665826396310047	0.0865921250165015	0.4696587353646029	0.6231031229833087	NA	FALSE	FALSE
ribo	Ara-1	ECB_00648	12.494206283677526	0.3106104543478904	0.45440705601086817	0.24788636719361995	0.60628365178144	FALSE	FALSE
ribo	Ara-1	ECB_00649	3.3804217027002927	-0.07580636337307183	0.46538314144003046	0.6645092322555861	NA	FALSE	FALSE
ribo	Ara-1	ECB_00650	0.0952580173277935	-0.014337373997168897	0.49478815040893903	0.9268960539205255	NA	FALSE	FALSE
ribo	Ara-1	ECB_00651	24.777536832134164	-0.5887692575844461	0.6167153820474006	0.06382384353194635	0.2964172783130994	FALSE	FALSE
ribo	Ara-1	ECB_00652	45.893822065400826	-0.23970731573960924	0.36037885169633976	0.35057841996172473	0.7105811209295992	FALSE	FALSE
ribo	Ara-1	ECB_00653	6.1641043583259	0.2882935402486361	0.5222447242333386	0.21955554294992458	NA	FALSE	FALSE
ribo	Ara-1	ECB_00654	3.8570340668096823	-0.04854155797266763	0.45258568187903947	0.7967205950469463	NA	FALSE	FALSE
ribo	Ara-1	ECB_00655	2.7978567327499055	0.0686933669682901	0.46601814801319363	0.6892658144791872	NA	FALSE	FALSE
ribo	Ara-1	ECB_00656	0.8409895385622993	-0.10378913947092104	0.5031767929450364	0.34302160597777326	NA	FALSE	FALSE
ribo	Ara-1	ECB_00657	432.86640747272486	-0.5409066714096664	0.3337188576116984	0.03858965475943312	0.2198060832282051	FALSE	FALSE
ribo	Ara-1	ECB_00658	2.097241089734512	-0.21844206095477028	0.5516553262086216	0.07338440790254241	NA	FALSE	FALSE
ribo	Ara-1	ECB_00659	2.030981074729816	-0.22319840953818518	0.5526480444134797	0.07780210635628346	NA	FALSE	FALSE
ribo	Ara-1	ECB_00660	2.624697317850103	0.016134210377575422	0.46571878563602204	0.9193032907735146	NA	FALSE	FALSE
ribo	Ara-1	ECB_00661	2.1395636507145537	-0.07328206899353089	0.47588940072517494	0.6388075688164113	NA	FALSE	FALSE
ribo	Ara-1	ECB_00662	1.6378256008512524	0.13438707532910865	0.49766018056629974	0.3664554795216313	NA	FALSE	FALSE
ribo	Ara-1	ECB_00663	0.5973738181976452	0.09667144256731108	0.5013514041115419	0.31749724591066747	NA	FALSE	FALSE
ribo	Ara-1	ECB_00664	1.0679486676481418	0.20110585702598766	0.5434930125173033	0.09431739729342553	NA	FALSE	FALSE
ribo	Ara-1	ECB_00666	0.341842813044859	-0.03550293894233534	0.4951525201262043	0.8098023689493016	NA	FALSE	FALSE
ribo	Ara-1	ECB_00667	7.331954009717588	-0.6333000913208501	0.8781388717158132	0.05573657367751843	NA	FALSE	FALSE
ribo	Ara-1	ECB_00668	21.17500440409374	0.2584542104091329	0.38682873989438926	0.3298790398448178	0.69107571005465	FALSE	FALSE
ribo	Ara-1	ECB_00669	17.638457500922982	1.4064878718349798	0.7748082092347249	0.005955306278606461	0.06427846885495887	FALSE	FALSE
ribo	Ara-1	ECB_00670	645.4639624551588	0.04704854433554443	0.29845006789994716	0.8454798637893655	0.9533249486103406	FALSE	FALSE
ribo	Ara-1	ECB_00671	151.22204682177994	-0.05453296942308992	0.31013083068756364	0.8194892660518112	0.9466025468786383	FALSE	FALSE
ribo	Ara-1	ECB_00672	174.0602548936116	-0.1478210072446495	0.2917066139148397	0.5287600278957238	0.8150760333556728	FALSE	FALSE
ribo	Ara-1	ECB_00673	51.741580545042694	0.2605575627381235	0.3729839642357977	0.3250132155092167	0.6896916829255694	FALSE	FALSE
ribo	Ara-1	ECB_00674	127.26366677917655	0.2450535851797391	0.29991833510317106	0.31403682695901497	0.6838565113383813	FALSE	FALSE
ribo	Ara-1	ECB_00675	16.759729439148444	-0.011923349679898256	0.3701612320618291	0.9602989618415606	0.9847609663772837	FALSE	FALSE
ribo	Ara-1	ECB_00676	1.037005592340575	-0.03617995938066751	0.4838014385088783	0.7658026913873652	NA	FALSE	FALSE
ribo	Ara-1	ECB_00677	1.3349478759414326	0.043037852672488726	0.4782870917005362	0.7474785242739126	NA	FALSE	FALSE
ribo	Ara-1	ECB_00678	2.966526905722389	-0.1568380308428382	0.49554898878046827	0.3687620359760448	NA	FALSE	FALSE
ribo	Ara-1	ECB_00679	0	NA	NA	NA	NA	FALSE	FALSE
ribo	Ara-1	ECB_00680	1821.7604628486542	-0.1536296844306001	0.314071469598579	0.5236332397876643	0.8132968828610282	FALSE	FALSE
ribo	Ara-1	ECB_00681	70.572883925867	0.9705674015626514	0.492033289404696	0.008052762114449176	0.07863803514800112	FALSE	FALSE
ribo	Ara-1	ECB_00682	66.53949345326222	1.5666736339224765	0.46181421008601514	7.655717320560979e-5	0.0018041164520589533	FALSE	TRUE
ribo	Ara-1	ECB_00683	788.7171317960427	0.5704342579554809	0.41689925804943284	0.05988323986187234	0.28451702001358486	FALSE	FALSE
ribo	Ara-1	ECB_00684	260.26420281492096	0.48421242940372494	0.38400352653765885	0.09029241363488166	0.36250822131848043	FALSE	FALSE
ribo	Ara-1	ECB_00685	2209.7826505389517	0.14123134940112025	0.29089871770093945	0.5543799851461739	0.8330237635129704	FALSE	FALSE
ribo	Ara-1	ECB_00686	3381.0167509175453	0.04456177361883686	0.2798790132686493	0.8494393145322932	0.9550019059078281	FALSE	FALSE
ribo	Ara-1	ECB_00687	2298.522958886189	0.15778022323305688	0.28957985327279956	0.5080941039038198	0.8082457887162064	FALSE	FALSE
ribo	Ara-1	ECB_00688	822.4871384033173	0.13762509925458988	0.28189888869240814	0.5571990585727427	0.8338861804812185	FALSE	FALSE
ribo	Ara-1	ECB_00689	29.36744717277326	-0.079328031858747	0.34492644143682044	0.7494837765223392	0.9226851433481728	FALSE	FALSE
ribo	Ara-1	ECB_00690	1.647709654275589	0.19616081699634286	0.5239346442521878	0.2135528247670865	NA	FALSE	FALSE
ribo	Ara-1	ECB_00691	30.10510242749076	-0.029077061702009677	0.3368212704537837	0.9054053656415851	0.9694208370851878	FALSE	FALSE
ribo	Ara-1	ECB_00692	2913.0061520736617	-0.029971137117776023	0.3947863503203204	0.8996916108824883	0.9679239107327312	FALSE	FALSE
ribo	Ara-1	ECB_00693	1339.117047870747	-0.1425435775968138	0.40535332125660967	0.5554570153588239	0.8331029905634646	FALSE	FALSE
ribo	Ara-1	ECB_00694	1581.6328626293684	-0.42419209263418767	0.5512894529452819	0.11968532883355458	0.4270773594760076	FALSE	FALSE
ribo	Ara-1	ECB_00695	60.892087507573436	-0.636874139131782	0.47446987179984734	0.04305259564615214	0.2366304103872458	FALSE	FALSE
ribo	Ara-1	ECB_00696	99.96119120605952	-0.24336909181092148	0.31309742279228936	0.3212917831064757	0.6864849703635646	FALSE	FALSE
ribo	Ara-1	ECB_00697	290.5639072588998	-0.18302932812220607	0.3210997667867367	0.45586719770374273	0.779132749259581	FALSE	FALSE
ribo	Ara-1	ECB_00698	165.06453043033426	-0.1337574425614087	0.33125424249237795	0.5877370325286153	0.848689622321252	FALSE	FALSE
ribo	Ara-1	ECB_00699	246.28237666806547	-0.1777918076121164	0.28671959585673684	0.446131908290358	0.771895548487263	FALSE	FALSE
ribo	Ara-1	ECB_00700	1834.3813814488385	-0.41548928652243544	0.27089586963968676	0.06667751216172842	0.30265611250282554	FALSE	FALSE
ribo	Ara-1	ECB_00701	3014.1111611619835	0.10742997112922566	0.2340634739219985	0.6044968441964117	0.8548520547467031	FALSE	FALSE
ribo	Ara-1	ECB_00702	341.4044341833367	-0.011797429509822193	0.2674332450698067	0.9422233126939565	0.9790314783799431	FALSE	FALSE
ribo	Ara-1	ECB_00703	161.07811019784054	2.3449388043720463	0.36967046749356863	2.2111391937460183e-11	1.4637741462598643e-9	FALSE	TRUE
ribo	Ara-1	ECB_00704	179.9324133732895	2.34205966485703	0.35179811900772284	2.764484932873991e-12	2.1672106881662157e-10	FALSE	TRUE
ribo	Ara-1	ECB_00705	46.04312093438547	-0.024687955225840722	0.37244578624223823	0.917910155005614	0.9742761457015646	FALSE	FALSE
ribo	Ara-1	ECB_00706	8.777870582477501	-0.3129384640716091	0.5168267899510081	0.21142827801206532	0.5554187303332827	FALSE	FALSE
ribo	Ara-1	ECB_00707	4408.0411779610095	-0.2119338197017026	0.3091253718465349	0.3875641903515797	0.7316563517473738	FALSE	FALSE
ribo	Ara-1	ECB_00708	5770.720147344007	-0.15789032161965078	0.26225530978741757	0.4779383670567654	0.7896718776828088	FALSE	FALSE
ribo	Ara-1	ECB_00709	146.02304480490412	0.15035573381435535	0.32758002618259213	0.5483217058254519	0.8302194565651532	FALSE	FALSE
ribo	Ara-1	ECB_00710	143.44888733152663	0.08279106900254532	0.3133331041639932	0.7360600350564932	0.9163070808329683	FALSE	FALSE
ribo	Ara-1	ECB_00711	50.23681982090888	0.02053499957227378	0.31879662256324753	0.9339682911455058	0.9772168026934688	FALSE	FALSE
ribo	Ara-1	ECB_00712	180.77991428551962	0.15915721841740502	0.29554968377658025	0.5080423505925726	0.8082457887162064	FALSE	FALSE
ribo	Ara-1	ECB_00713	928.861285165056	-1.0420512676498999	0.5151657070482927	0.004050050490777849	0.04924530780419271	FALSE	FALSE
ribo	Ara-1	ECB_00714	68.15656939273069	-0.04873276884980714	0.3115699163799949	0.8396550205833163	0.9511223709184965	FALSE	FALSE
ribo	Ara-1	ECB_00715	468.06567953785225	-0.6135110401774959	0.3048258660068768	0.014262385829310395	0.11545556354759692	FALSE	FALSE
ribo	Ara-1	ECB_00716	43.508770618228	-0.07081389516053457	0.32600313240641615	0.7723822553476227	0.9341968082340919	FALSE	FALSE
ribo	Ara-1	ECB_00717	18.25253568983026	-0.11543688264534553	0.3834520496282625	0.6425049089402901	0.8750563187352711	FALSE	FALSE
ribo	Ara-1	ECB_00718	25.122365512156087	0.14048222985170056	0.3561005046293462	0.5792215682152957	0.8458316936079037	FALSE	FALSE
ribo	Ara-1	ECB_00719	73.24680154287327	0.5925982492106345	0.40100195737261096	0.04766642797701038	0.254477220328878	FALSE	FALSE
ribo	Ara-1	ECB_00720	440.78361125769055	-0.12630843922112875	0.27274978031361163	0.5770257001021213	0.8446975727784862	FALSE	FALSE
ribo	Ara-1	ECB_00721	1.790391599674249	-0.1675403215638024	0.52607235651739	0.12431413163379315	NA	FALSE	FALSE
ribo	Ara-1	ECB_00722	0.5228147621529368	0.019007717363100345	0.4892390033929938	0.8003621481866735	NA	FALSE	FALSE
ribo	Ara-1	ECB_00723	0.4826498787682829	-0.04696151887381665	0.49589741047043334	0.6733931950237855	NA	FALSE	FALSE
ribo	Ara-1	ECB_00724	5.319294535375855	-0.1340451720311517	0.4582528126082677	0.5261397926301329	NA	FALSE	FALSE
ribo	Ara-1	ECB_00725	280.17272051280077	1.300948695777254	0.43191791554457354	3.539764429662006e-4	0.007029972157308744	FALSE	TRUE
ribo	Ara-1	ECB_00726	26.051291632346132	-0.12877234158414042	0.3874526655959728	0.6040316339655187	0.8548520547467031	FALSE	FALSE
ribo	Ara-1	ECB_00727	1.8612798554690262	-0.12798767131574354	0.4965653617091044	0.3802561722637776	NA	FALSE	FALSE
ribo	Ara-1	ECB_00728	3.4351530796227396	0.09448265040420949	0.4656257487101751	0.6041464112976327	NA	FALSE	FALSE
ribo	Ara-1	ECB_00729	0.5665345916758099	-0.04111549757305053	0.495927926252067	0.6750385421030989	NA	FALSE	FALSE
ribo	Ara-1	ECB_00730	0.443927090976548	0.0543742151643515	0.49428487818774997	0.5208806947837994	NA	FALSE	FALSE
ribo	Ara-1	ECB_00731	1.669706520147435	0.3381750212729187	0.63490455766228	0.06432468302397071	NA	FALSE	FALSE
ribo	Ara-1	ECB_00732	4.6504416291920085	0.12413320221112327	0.45474653293558814	0.552972256871973	NA	FALSE	FALSE
ribo	Ara-1	ECB_00733	3.912720169825155	-0.04950610734763256	0.4575498534257607	0.7840796121659377	NA	FALSE	FALSE
ribo	Ara-1	ECB_00734	3.433175239280324	-0.3396180654907613	0.6152602003186313	0.11337538672241111	NA	FALSE	FALSE
ribo	Ara-1	ECB_00735	0.6651349505309042	-0.06067619282408808	0.49738458492469295	0.5314537784521132	NA	FALSE	FALSE
ribo	Ara-1	ECB_00736	2.99164194499026	-0.19309200064957824	0.5249647081750326	0.1992750813456332	NA	FALSE	FALSE
ribo	Ara-1	ECB_00737	24.53600296399614	-0.01918504464339009	0.3769449260065255	0.9365842641882061	0.9776049484991822	FALSE	FALSE
ribo	Ara-1	ECB_00738	1.6487563084555523	7.544695650355785e-4	0.47267844044733126	0.9962616172645283	NA	FALSE	FALSE
ribo	Ara-1	ECB_00739	25.42346632512853	0.03349551885335582	0.39027494672816676	0.8929616700768328	0.9668878332694049	FALSE	FALSE
ribo	Ara-1	ECB_00740	28.719887308059104	-0.0511107350142405	0.3834003894248003	0.8313594619660037	0.9484268248875608	FALSE	FALSE
ribo	Ara-1	ECB_00741	36.43630094750732	-0.09656515828744631	0.4380861194836074	0.6529818107000263	0.878431599203059	FALSE	FALSE
ribo	Ara-1	ECB_00742	94.5584431869402	-0.048685784764028704	0.4043405901941011	0.8331858971196046	0.9484268248875608	FALSE	FALSE
ribo	Ara-1	ECB_00743	28.849411049185278	-0.19033930082818482	0.44442686540968956	0.4203119249410381	0.7547373263407791	FALSE	FALSE
ribo	Ara-1	ECB_00744	53.83092189516468	0.32098579215235207	0.4586002278782509	0.2420864911327586	0.6004793148080665	FALSE	FALSE
ribo	Ara-1	ECB_00745	222.53059827076302	-0.09091010889036356	0.38937332477816733	0.7064751877716592	0.903943677641067	FALSE	FALSE
ribo	Ara-1	ECB_00746	410.1276594387692	-0.6344780515706988	0.3634481551404975	0.022468849560094175	0.1531686563833422	FALSE	FALSE
ribo	Ara-1	ECB_00747	72.88290557113181	-0.2743355220023871	0.31700429013204057	0.26867955145525846	0.6317256383466574	FALSE	FALSE
ribo	Ara-1	ECB_00748	31.459134420837973	-0.04582131212649812	0.3557304446102955	0.8522651196641007	0.9550019059078281	FALSE	FALSE
ribo	Ara-1	ECB_00749	59.27557362215427	0.2617005235383006	0.3863559776115703	0.3268137058263567	0.6896916829255694	FALSE	FALSE
ribo	Ara-1	ECB_00750	50.60411561294985	-0.02302623285416287	0.3085960691882635	0.9229465180772958	0.9756938431773322	FALSE	FALSE
ribo	Ara-1	ECB_00751	43.33968673136263	0.02597553308166925	0.3524734263128107	0.9178746437411228	0.9742761457015646	FALSE	FALSE
ribo	Ara-1	ECB_00752	27.80580612860995	-0.1482291173832353	0.36884042976021914	0.557222947428347	0.8338861804812185	FALSE	FALSE
ribo	Ara-1	ECB_00753	637.4273015412087	-0.07548177520875544	0.29476749188371526	0.7480722738742797	0.9226851433481728	FALSE	FALSE
ribo	Ara-1	ECB_00754	1.0918802975990238	-0.11119354109834172	0.5059863612730394	0.27880541871443826	NA	FALSE	FALSE
ribo	Ara-1	ECB_00755	3.3525453702786603	-0.0016517954336007078	0.4523074673753272	0.992025115491118	NA	FALSE	FALSE
ribo	Ara-1	ECB_00756	15.021871222033225	-0.3378640380200196	0.5087630847057499	0.20077481081708565	0.5411345499178161	FALSE	FALSE
ribo	Ara-1	ECB_00757	5.318851938559888	-0.26492596477928326	0.5301078621567965	0.2169825207755535	NA	FALSE	FALSE
ribo	Ara-1	ECB_00758	33.58493059366951	-0.23777765596027955	0.3753357914069645	0.36148337769916977	0.712930012924229	FALSE	FALSE
ribo	Ara-1	ECB_00759	18.745557101600355	-0.43965207979131	0.5375957637623638	0.12879347434727845	0.441360788549397	FALSE	FALSE
ribo	Ara-1	ECB_00760	47.33832349698931	0.18335444594845052	0.3498155560752587	0.47448296345310215	0.789122952137779	FALSE	FALSE
ribo	Ara-1	ECB_00761	30.785508651717464	-0.18349610241824604	0.36028479725419343	0.4697834406795926	0.7866694040385083	FALSE	FALSE
ribo	Ara-1	ECB_00762	54.51781251168967	-0.16083220654398547	0.3831356817263991	0.5199674428856527	0.8105614925988275	FALSE	FALSE
ribo	Ara-1	ECB_00763	23.634140456938926	-0.033022393341483304	0.36146250029991084	0.892356553429392	0.9668878332694049	FALSE	FALSE
ribo	Ara-1	ECB_00764	209.07705121426193	0.6241659045730149	0.45286296332776743	0.0504820727499559	0.2606344795877273	FALSE	FALSE
ribo	Ara-1	ECB_00765	9.98614429384899	0.14042906161646648	0.4159967623201256	0.564897015989435	0.8377812287761782	FALSE	FALSE
ribo	Ara-1	ECB_00766	78.23300679371943	0.02402515000958927	0.32254294987507326	0.9220533486259522	0.9754250445869005	FALSE	FALSE
ribo	Ara-1	ECB_00767	137.89174027242566	-0.04479905292895601	0.3187816642318713	0.8529086015829332	0.9550019059078281	FALSE	FALSE
ribo	Ara-1	ECB_00768	730.4781633967515	0.3303865318111286	0.29472559172490564	0.17495603165465867	0.5074917412845454	FALSE	FALSE
ribo	Ara-1	ECB_00769	206.64106566441683	-0.3324098497065193	0.3857442478943121	0.21342436072719392	0.5576059510059664	FALSE	FALSE
ribo	Ara-1	ECB_00770	35.31278610678231	-0.02071184763460592	0.39696246722429446	0.9282383294056793	0.976088914111246	FALSE	FALSE
ribo	Ara-1	ECB_00771	99.74009091480349	0.08943586083077558	0.4717761985992802	0.6082031653663751	0.8559479958526618	FALSE	FALSE
ribo	Ara-1	ECB_00772	245.58230133536716	0.10658746807260858	0.4828781481672231	0.5112329686948908	0.8087960773988739	FALSE	FALSE
ribo	Ara-1	ECB_00773	8.478515422442156	0.07048316515161088	0.42190734823771664	0.7557983036015841	NA	FALSE	FALSE
ribo	Ara-1	ECB_00774	53.244645432141276	0.3757991119029539	0.3874279886656841	0.17745677070212462	0.5107668791513326	FALSE	FALSE
ribo	Ara-1	ECB_00775	13.037306875294187	0.011727615203912724	0.3851797193221774	0.9623739853456329	0.9855318330507529	FALSE	FALSE
ribo	Ara-1	ECB_00776	266.9744478310348	0.3571541651917196	0.41314377391838414	0.2057143899767169	0.5491247022765589	FALSE	FALSE
ribo	Ara-1	ECB_00777	98.70272725739102	0.47524038953189324	0.5021755900858969	0.12158457982610925	0.4270773594760076	FALSE	FALSE
ribo	Ara-1	ECB_00778	889.9052805730358	0.8336941477946765	0.4908032364660073	0.018125315164902737	0.13234145557903249	FALSE	FALSE
ribo	Ara-1	ECB_00779	250.89888099165427	0.07304297171078984	0.308498795270426	0.7651807582649159	0.9303973383147691	FALSE	FALSE
ribo	Ara-1	ECB_00780	22.8233310544587	0.7098084347315403	0.5018318502511644	0.03500922624533105	0.20611163040482453	FALSE	FALSE
ribo	Ara-1	ECB_00781	2719.5729927579778	0.5451492346743564	0.27082862636358485	0.019990180151720494	0.14178749207613178	FALSE	FALSE
ribo	Ara-1	ECB_00782	33.0159629492268	1.0055701312689305	0.5174672803468058	0.007804284431804021	0.07723908080513017	FALSE	FALSE
ribo	Ara-1	ECB_00783	193.48450237360058	-0.791258914470184	0.3741436844421568	0.006675869631165056	0.06953641829105141	FALSE	FALSE
ribo	Ara-1	ECB_00784	51.74877988487124	-0.3587853277597852	0.3688336311802008	0.1805382245687135	0.5107992069950409	FALSE	FALSE
ribo	Ara-1	ECB_00785	37.259706893502766	-0.40037717872164424	0.39983916705299516	0.14995560805423871	0.4722175014731259	FALSE	FALSE
ribo	Ara-1	ECB_00786	555.8897371058049	-0.09716384503228888	0.31036155071836075	0.6849602842731248	0.886786913015923	FALSE	FALSE
ribo	Ara-1	ECB_00787	556.1532226826123	-0.021221620199618634	0.33875942969076606	0.9297198538900024	0.9766266551353963	FALSE	FALSE
ribo	Ara-1	ECB_00788	24.140778615811975	0.7018084374309577	0.4937860971414097	0.035815739749562966	0.20893383145590966	FALSE	FALSE
ribo	Ara-1	ECB_00789	101.98468363015678	0.07382457195934601	0.30609395927073785	0.7618935519951948	0.9279153276343768	FALSE	FALSE
ribo	Ara-1	ECB_00790	9.499510233059688	0.2762866904910291	0.45950640700119627	0.28848565609893456	0.6544192774092779	FALSE	FALSE
ribo	Ara-1	ECB_00791	0.5973738181976452	0.09667144256731108	0.5013514041115419	0.31749724591066747	NA	FALSE	FALSE
ribo	Ara-1	ECB_00792	41.556365238136905	-0.4271590532691736	0.4341600738498679	0.13342051470032953	0.44756140591227767	FALSE	FALSE
ribo	Ara-1	ECB_00793	144.0679876496608	-0.3036765638895613	0.3251605369818293	0.225844470025999	0.5789936972525396	FALSE	FALSE
ribo	Ara-1	ECB_00794	418.05040121570323	-0.08701199704008193	0.3034807274682982	0.7148451555428174	0.9084998798472921	FALSE	FALSE
ribo	Ara-1	ECB_00795	235.23625216534802	-0.6014900311460972	0.6000967562651386	0.0558394768044508	0.27506972887837733	FALSE	FALSE
ribo	Ara-1	ECB_00796	245.83767733793817	-1.1338166510154835	0.4908013684890714	0.0018336097080024307	0.026261169808361736	FALSE	FALSE
ribo	Ara-1	ECB_00797	771.220102789862	-0.5531967742260913	0.40838134265433107	0.054626089899675864	0.2704837112733618	FALSE	FALSE
ribo	Ara-1	ECB_00798	141.1406413743717	-0.2540921656768812	0.3483755622951401	0.31889814627341073	0.6858575829931816	FALSE	FALSE
ribo	Ara-1	ECB_00799	151.89200978576696	-0.18071566264403033	0.35501593039020823	0.47355690845957416	0.789122952137779	FALSE	FALSE
ribo	Ara-1	ECB_00800	3.2892815476722297	-0.02964622664433819	0.4631177970301375	0.8605805301802155	NA	FALSE	FALSE
ribo	Ara-1	ECB_00801	2.8163470277331357	0.15741394923724333	0.4864863184475455	0.39600840589268654	NA	FALSE	FALSE
ribo	Ara-1	ECB_00802	313.9935824344876	1.040574693410765	0.5091426033227436	0.006293314343010081	0.06648150151711714	FALSE	FALSE
ribo	Ara-1	ECB_00803	64.27808114867761	0.11268835808940253	0.47961868020740445	0.5127633315890041	0.8098117325028825	FALSE	FALSE
ribo	Ara-1	ECB_00804	11.59848977906045	0.05432933099104777	0.41509270861488357	0.812742089857589	0.9466025468786383	FALSE	FALSE
ribo	Ara-1	ECB_00805	449.3853946032897	0.11228110095256337	0.2599823166402827	0.6144575078719277	0.8587663663367787	FALSE	FALSE
ribo	Ara-1	ECB_00806	387.3528087431688	-0.15768262754365453	0.3042050639244204	0.510223873150562	0.8087960773988739	FALSE	FALSE
ribo	Ara-1	ECB_00807	99.27119968830479	-0.317821089007797	0.31208852750357885	0.1970250197171379	0.5365059723376178	FALSE	FALSE
ribo	Ara-1	ECB_00808	165.73222784756194	-0.17593713874082215	0.3479108413365156	0.4820685151443259	0.7920274968632898	FALSE	FALSE
ribo	Ara-1	ECB_00809	39.85005846293014	0.8675793012093386	0.5761053540305712	0.02210634883354838	0.15173920086437934	FALSE	FALSE
ribo	Ara-1	ECB_00810	6.8438000326869854	0.41952809903749044	0.5822637678388434	0.12586751839872354	NA	FALSE	FALSE
ribo	Ara-1	ECB_00811	78.53297956667411	0.25221076350692867	0.32284419074084897	0.318802322889122	0.6858575829931816	FALSE	FALSE
ribo	Ara-1	ECB_00812	54.94788864219758	0.10919732706700253	0.3536034175854317	0.665690810494211	0.8824245183867696	FALSE	FALSE
ribo	Ara-1	ECB_00813	6.246512849442622	-0.20068847257155553	0.47475459478557286	0.3716518946849085	NA	FALSE	FALSE
ribo	Ara-1	ECB_00814	39.96219347985643	0.24110168049936134	0.3579065680120114	0.3575027082312197	0.7124027452997602	FALSE	FALSE
ribo	Ara-1	ECB_00815	11.70583892976947	-0.3176554080537904	0.48552338162776076	0.22852978293009535	0.5838681160795489	FALSE	FALSE
ribo	Ara-1	ECB_00816	9.58511050332059	-0.23231875331548696	0.4611915345314298	0.342770547047201	0.7032461843344434	FALSE	FALSE
ribo	Ara-1	ECB_00817	146.27334849104253	-0.349135213919285	0.33797984376474144	0.1724962570259199	0.5042849358981505	FALSE	FALSE
ribo	Ara-1	ECB_00818	0.8077774163792937	-0.08624672032009006	0.5003114910952433	0.40599644633486726	NA	FALSE	FALSE
ribo	Ara-1	ECB_00819	1.3302699010618084	-0.10213558500011591	0.505637674198094	0.25282864231109275	NA	FALSE	FALSE
ribo	Ara-1	ECB_00820	0.6242745235009387	-0.05618794343204588	0.4967119029132189	0.5811682875033012	NA	FALSE	FALSE
ribo	Ara-1	ECB_00821	0	NA	NA	NA	NA	FALSE	FALSE
ribo	Ara-1	ECB_00822	1.2038535903606655	-0.1487546081294193	0.5161697619715503	0.19390308252418761	NA	FALSE	FALSE
ribo	Ara-1	ECB_00823	0.28410288121973015	-0.029108642279282757	0.4948788240059288	0.9383659533832887	NA	FALSE	FALSE
ribo	Ara-1	ECB_00824	0.5672194888350807	0.041692133204719296	0.49026298772373095	0.6567425765474142	NA	FALSE	FALSE
ribo	Ara-1	ECB_00825	4.295450492177501	0.0869450997072459	0.4546218289131899	0.6572426218749373	NA	FALSE	FALSE
ribo	Ara-1	ECB_00826	18.56115568569248	-3.4169969958571573	1.0598648572036367	3.1573330668566293e-4	0.006398432113038027	FALSE	TRUE
ribo	Ara-1	ECB_00827	3.2516608332304253	-0.04681042241292554	0.46396029074268824	0.7784253197406465	NA	FALSE	FALSE
ribo	Ara-1	ECB_00828	55.40358284542794	-0.9740751682519196	0.47267836830550497	0.005412855757940151	0.05972184186260633	FALSE	FALSE
ribo	Ara-1	ECB_00829	1.147784829299187	-0.13668690225822036	0.5125472933130021	0.21702096987242703	NA	FALSE	FALSE
ribo	Ara-1	ECB_00830	190.59439162112338	-0.21872917766838168	0.30314516886377196	0.36325801136750985	0.7133458245641475	FALSE	FALSE
ribo	Ara-1	ECB_00831	67.09442469222164	-0.08029244581332268	0.336716284769757	0.7450527060679679	0.9218554643223551	FALSE	FALSE
ribo	Ara-1	ECB_00832	0.9392166312425042	0.055197182093916365	0.48686192375518195	0.6258563872226128	NA	FALSE	FALSE
ribo	Ara-1	ECB_00833	1.3962050251412181	-0.16993182302527693	0.5243216256492397	0.15127572757625354	NA	FALSE	FALSE
ribo	Ara-1	ECB_00834	9.053938647904982	-4.596698177965558	2.38944459241136	4.761014040181187e-4	0.008799369390983205	FALSE	TRUE
ribo	Ara-1	ECB_00835	0	NA	NA	NA	NA	FALSE	FALSE
ribo	Ara-1	ECB_00836	1.3094444391809705	-0.04934004689184125	0.4823437719171421	0.6741087155106373	NA	FALSE	FALSE
ribo	Ara-1	ECB_00837	0.3776897277838733	-0.02966778709176414	0.4952452020992258	0.8701353856075474	NA	FALSE	FALSE
ribo	Ara-1	ECB_00838	0.7684239307516634	-0.0862558715032374	0.5004049905863702	0.4047441070955342	NA	FALSE	FALSE
ribo	Ara-1	ECB_00839	1.5561330836837675	0.018769879968492848	0.47977923468628664	0.8772719573909494	NA	FALSE	FALSE
ribo	Ara-1	ECB_00840	68.74587580549303	-0.43095454921492543	0.3649929064238055	0.11024229188521055	0.41000223161803023	FALSE	FALSE
ribo	Ara-1	ECB_00841	1.9075244475099682	-0.17939899299924641	0.5318393912794329	0.10482087273586378	NA	FALSE	FALSE
ribo	Ara-1	ECB_00842	1.0253415579612404	-0.014738980750410923	0.48319073520145733	0.8776880109881775	NA	FALSE	FALSE
ribo	Ara-1	ECB_00843	2.314586802631768	-0.15843612903369578	0.5066421618303196	0.2857822663713244	NA	FALSE	FALSE
ribo	Ara-1	ECB_00844	3.168422426050451	-0.2999800774480623	0.5826902788984787	0.13665783872467868	NA	FALSE	FALSE
ribo	Ara-1	ECB_00845	11.325632507267038	-1.4081865050802558	1.0440353148813024	0.013646534463779215	0.1116841378230722	FALSE	FALSE
ribo	Ara-1	ECB_00846	11.636862448661102	0.008701182262227169	0.401425978440242	0.9715779024076631	0.9886412229953744	FALSE	FALSE
ribo	Ara-1	ECB_00847	4.2020820742980485	0.07552235394552188	0.4604641185016555	0.6826073039610933	NA	FALSE	FALSE
ribo	Ara-1	ECB_00848	0.9495601092210565	-0.018613752317723317	0.4840844941926461	0.8799315219599906	NA	FALSE	FALSE
ribo	Ara-1	ECB_00849	0.9250322995789333	-0.016630813553870208	0.48401960378141373	0.8948535408083693	NA	FALSE	FALSE
ribo	Ara-1	ECB_00850	0.11978582696991673	-0.015486934392861557	0.49481958137768434	0.9268960539205255	NA	FALSE	FALSE
ribo	Ara-1	ECB_00851	1.9233861311893978	-0.23788750695856764	0.5597325490092929	0.07563831406956752	NA	FALSE	FALSE
ribo	Ara-1	ECB_00852	89.21763855891666	0.05708716520581517	0.3264142669279667	0.816813406834882	0.9466025468786383	FALSE	FALSE
ribo	Ara-1	ECB_00853	3.496070260945698	-0.21211617029598273	0.5123558664523924	0.2755301065309158	NA	FALSE	FALSE
ribo	Ara-1	ECB_00854	19.388681219076883	-0.03441289210077704	0.38400523894797245	0.8864646928096007	0.9660088368285906	FALSE	FALSE
ribo	Ara-1	ECB_00855	15.93651505537253	0.015246996861217894	0.38498504227540464	0.9509478566475593	0.9826131338720357	FALSE	FALSE
ribo	Ara-1	ECB_00856	373.38557192796304	-0.15296797330715173	0.3122803953403549	0.5271755936169317	0.8150760333556728	FALSE	FALSE
ribo	Ara-1	ECB_00857	98.35356113740735	0.24618264176257587	0.3075299962611273	0.3174107844407822	0.6858575829931816	FALSE	FALSE
ribo	Ara-1	ECB_00858	86.33417338904098	-0.10415812075618722	0.33051522431118047	0.6725690757108427	0.8841823292055868	FALSE	FALSE
ribo	Ara-1	ECB_00859	343.32338436006813	0.582786358298175	0.42972950652324987	0.05863446236535823	0.281729134494197	FALSE	FALSE
ribo	Ara-1	ECB_00860	155.55181675566828	0.2682305138167353	0.4076168340633216	0.3230397909392805	0.6878738650522633	FALSE	FALSE
ribo	Ara-1	ECB_00861	114.94500892029245	0.31713073523367136	0.4222619686046961	0.2515203161744848	0.6104160825505703	FALSE	FALSE
ribo	Ara-1	ECB_00862	125.57639646558849	0.12633971218423118	0.39982393735338045	0.612246148580911	0.8582970713517807	FALSE	FALSE
ribo	Ara-1	ECB_00863	10.593989310469533	0.16552204459806388	0.43422442945798667	0.48924781871746065	0.7962647680333609	FALSE	FALSE
ribo	Ara-1	ECB_00864	27.611910283315048	0.42761423689272055	0.4325000048588577	0.14098490771506073	0.4603095758237241	FALSE	FALSE
ribo	Ara-1	ECB_00865	718.7372781478165	1.1054546197041852	0.43893206892000236	0.001845943356560463	0.026311317029634542	FALSE	FALSE
ribo	Ara-1	ECB_00866	117.6723682069436	0.14463395413160893	0.3500464852265018	0.5709365256430379	0.8400895728955794	FALSE	FALSE
ribo	Ara-1	ECB_00867	46.18375405370773	0.420663240986225	0.39194952769647323	0.13697843733355242	0.45390296420094844	FALSE	FALSE
ribo	Ara-1	ECB_00868	372.0961896693376	0.2299982301866155	0.32129721718188303	0.36178322718021927	0.712930012924229	FALSE	FALSE
ribo	Ara-1	ECB_00869	120.3869668657187	0.7911140829721517	0.4769622679766344	0.021166386347190883	0.14595987251917045	FALSE	FALSE
ribo	Ara-1	ECB_00870	45.61323326624609	-0.5240568207372424	0.4995371302379591	0.08233519939731705	0.3406618875063993	FALSE	FALSE
ribo	Ara-1	ECB_00871	97.46718063926201	-0.5144019018513998	0.34780556280564157	0.05464778942861693	0.2704837112733618	FALSE	FALSE
ribo	Ara-1	ECB_00872	35.95626711248825	-0.4008745577690992	0.4050742776718273	0.14994142458346477	0.4722175014731259	FALSE	FALSE
ribo	Ara-1	ECB_00873	79.89252255555058	-0.2090606626967778	0.30587659878122997	0.38815021184546944	0.7322985947356894	FALSE	FALSE
ribo	Ara-1	ECB_00874	56.701923516890744	-0.10486269427006806	0.3207368433271819	0.6676686352614228	0.8824245183867696	FALSE	FALSE
ribo	Ara-1	ECB_00875	177.84769458694225	0.21229661095474078	0.3113323007373464	0.3915625743850164	0.7355578164639819	FALSE	FALSE
ribo	Ara-1	ECB_00876	65.10932727575195	-0.6244151776604026	0.5062238012858766	0.04992567336224001	0.26001500165404373	FALSE	FALSE
ribo	Ara-1	ECB_00877	7.113504336923101	-0.056812304014771345	0.4333143184249919	0.7911874357583413	NA	FALSE	FALSE
ribo	Ara-1	ECB_00878	1.5295773076629176	0.15758237797353244	0.5068185439870526	0.29703850906057366	NA	FALSE	FALSE
ribo	Ara-1	ECB_00879	57.194539200534514	0.9719890790788028	0.5741027368929353	0.013493651274116156	0.1116841378230722	FALSE	FALSE
ribo	Ara-1	ECB_00880	24.394206185921586	-0.03711897283347529	0.37108748761221033	0.8782813929894999	0.9639947629311393	FALSE	FALSE
ribo	Ara-1	ECB_00881	95.27746610916597	-0.43906552788529324	0.3309749847932462	0.0883173078945557	0.3560179434612739	FALSE	FALSE
ribo	Ara-1	ECB_00882	1131.6348863621379	-0.7186486628004297	0.31763108430763987	0.005796281040367815	0.06301869058122526	FALSE	FALSE
ribo	Ara-1	ECB_00883	82.37495269287304	-0.5356487630947299	0.39415922306406914	0.05961602070700922	0.28435602797755116	FALSE	FALSE
ribo	Ara-1	ECB_00884	61.95149199421116	-0.0638424373867075	0.30756964047884877	0.7899629468325002	0.9392306712216085	FALSE	FALSE
ribo	Ara-1	ECB_00885	64.27465034972825	0.0487320786088692	0.3008149765569354	0.8396951445168331	0.9511223709184965	FALSE	FALSE
ribo	Ara-1	ECB_00886	70.84650209745294	-0.6478574360360624	0.42047365690193506	0.03211650115529517	0.19406705261992763	FALSE	FALSE
ribo	Ara-1	ECB_00887	1234.7984117228661	-0.34456993102733213	0.4307542462768971	0.20390609642769844	0.5452749203394198	FALSE	FALSE
ribo	Ara-1	ECB_00888	374.6418079785162	0.5427182197665892	0.3765546461749443	0.05927755796583341	0.28435602797755116	FALSE	FALSE
ribo	Ara-1	ECB_00889	31.13204136034074	-0.1026673274266404	0.3422355164382918	0.6789002251386109	0.8842737679678444	FALSE	FALSE
ribo	Ara-1	ECB_00890	233.88157707613607	-0.3537159090555664	0.2998145037361153	0.1430405730410927	0.4621668840449188	FALSE	FALSE
ribo	Ara-1	ECB_00891	267.10076116401285	-0.22088578194914335	0.2688137775812364	0.3263756700946925	0.6896916829255694	FALSE	FALSE
ribo	Ara-1	ECB_00892	1245.5676210455665	-0.5892476779453915	0.2774638653313057	0.011917336376172422	0.10406683990298583	FALSE	FALSE
ribo	Ara-1	ECB_00893	2320.03256019089	0.053764152143176806	0.29941832773644395	0.8241040839207361	0.9468828631948973	FALSE	FALSE
ribo	Ara-1	ECB_00894	609.6112701959876	-0.019074783828810775	0.2516818540870303	0.9262182012101063	0.976088914111246	FALSE	FALSE
ribo	Ara-1	ECB_00895	669.9084594085623	-0.5641516551375328	0.3587581064852069	0.03816947552889733	0.21782924827698305	FALSE	FALSE
ribo	Ara-1	ECB_00896	207.21423666882112	-0.5616700180654146	0.30493178840553004	0.024393448765386776	0.16298823463872814	FALSE	FALSE
ribo	Ara-1	ECB_00897	1921.6217280794888	-0.2167898733789964	0.27793992644253307	0.34362681690513047	0.7045177478048064	FALSE	FALSE
ribo	Ara-1	ECB_00898	42.565874994718804	0.7171607552033831	0.7897863357445885	0.050079151452130884	0.2602328034019843	FALSE	FALSE
ribo	Ara-1	ECB_00899	11.440880785171455	1.4147772636680134	0.8352042874102901	0.006631818700306092	0.06931995757267315	FALSE	FALSE
ribo	Ara-1	ECB_00900	29.329965085319404	1.5492261643220289	0.6775654996062851	0.002001581781811062	0.027733544781465835	FALSE	FALSE
ribo	Ara-1	ECB_00901	16.139552318727546	-0.24341121727889042	0.41882604207550794	0.3504855613225441	0.7105811209295992	FALSE	FALSE
ribo	Ara-1	ECB_00902	53.37105470618799	-0.20929503042325862	0.3460227010648626	0.4090565592398555	0.7498392292438227	FALSE	FALSE
ribo	Ara-1	ECB_00903	1.0274615067930657	0.05177573776643094	0.48317701792519113	0.6779485053506964	NA	FALSE	FALSE
ribo	Ara-1	ECB_00904	10.098122885596856	-1.110299350114918	1.0583269570295009	0.023815763767073502	0.16015160330047848	FALSE	FALSE
ribo	Ara-1	ECB_00905	18.086408874265878	-0.12442336041995593	0.39644548846777855	0.6125588608741755	0.8583315364742092	FALSE	FALSE
ribo	Ara-1	ECB_00906	225.0648991242008	0.23160087540029917	0.4048727428244563	0.38178616343604777	0.7291090131139029	FALSE	FALSE
ribo	Ara-1	ECB_00907	11108.938165329164	0.6468400952890999	0.5131532336216474	0.05451999225962463	0.2704837112733618	FALSE	FALSE
ribo	Ara-1	ECB_00908	77.02090999721912	0.19103438851799157	0.3498167821088745	0.4568745907419462	0.7798310244413049	FALSE	FALSE
ribo	Ara-1	ECB_00909	403.63092431892153	0.8409888904772627	0.4697607028810215	0.015027561772381598	0.11780817505243363	FALSE	FALSE
ribo	Ara-1	ECB_00910	14.912838486922732	0.05685977623324485	0.3848897621822911	0.8167082277227578	0.9466025468786383	FALSE	FALSE
ribo	Ara-1	ECB_00911	4308.5150981780125	0.1561062257706638	0.28828622935050685	0.518214947713449	0.8104561270258305	FALSE	FALSE
ribo	Ara-1	ECB_00912	1203.6295220334794	0.0652800820683608	0.2893257382704524	0.783760041504943	0.938811296984922	FALSE	FALSE
ribo	Ara-1	ECB_00913	8.78458672841627	-0.21487337718268407	0.4705233215273259	0.3540032041068933	0.7124027452997602	FALSE	FALSE
ribo	Ara-1	ECB_00914	105.71025756185978	1.052997526141764	0.4185222582275755	0.0019485249277560472	0.027251904975517674	FALSE	FALSE
ribo	Ara-1	ECB_00915	12719.749543173817	0.36486364481686967	0.3306037320097413	0.16407674552481313	0.49522251764784025	FALSE	FALSE
ribo	Ara-1	ECB_00916	938.7112804791016	-0.12230614862013116	0.2629887899233146	0.5806348423990498	0.8458316936079037	FALSE	FALSE
ribo	Ara-1	ECB_00917	15.46430374342979	-0.0873755509459717	0.3870771795957089	0.7210654261688341	0.9093134302316592	FALSE	FALSE
ribo	Ara-1	ECB_00918	515.6611985148822	0.21066504660805532	0.3142749002149987	0.3977970854850103	0.7416869302857236	FALSE	FALSE
ribo	Ara-1	ECB_00919	133.32763331481925	0.07928757321473556	0.3236350367532243	0.7495461721727352	0.9226851433481728	FALSE	FALSE
ribo	Ara-1	ECB_00920	13.484813701101883	0.20130138084274854	0.415101774328628	0.4288430710879925	0.7618922757831381	FALSE	FALSE
ribo	Ara-1	ECB_00921	175.12104802049893	-0.16223714475851925	0.29228371739779624	0.4904694940590493	0.7964815342744055	FALSE	FALSE
ribo	Ara-1	ECB_00922	225.42988795740328	0.02974482220097982	0.2569618585160563	0.8937150806066292	0.9668878332694049	FALSE	FALSE
ribo	Ara-1	ECB_00923	42.95046830054973	-0.680375080113401	0.6060995470209413	0.042849508844092075	0.23597105458072612	FALSE	FALSE
ribo	Ara-1	ECB_00924	12.726339165755757	0.1427700979184888	0.40542010258269834	0.5637926446830438	0.8374326205549125	FALSE	FALSE
ribo	Ara-1	ECB_00925	45.53711976553554	-0.20455059451498184	0.3829807855566825	0.42221678586972783	0.7568157698136577	FALSE	FALSE
ribo	Ara-1	ECB_00926	183.2796397671211	-0.40335262880209183	0.2958069820606512	0.097828778594931	0.37946866072174407	FALSE	FALSE
ribo	Ara-1	ECB_00927	86.14815201934057	-0.43643411532236615	0.3447821290726923	0.09715464810339774	0.3778377241514646	FALSE	FALSE
ribo	Ara-1	ECB_00928	1091.778252236884	-0.2358142038760895	0.25469199587172425	0.27809647109626473	0.6427070499579306	FALSE	FALSE
ribo	Ara-1	ECB_00929	134.0574832390089	0.146920963650073	0.3095038093573017	0.5487183767135152	0.8302194565651532	FALSE	FALSE
ribo	Ara-1	ECB_00930	215.4715137218368	-0.6391721827807978	0.3829688703139228	0.02568523038063253	0.1693870981089089	FALSE	FALSE
ribo	Ara-1	ECB_00931	379.4792090624476	-0.46213682980709686	0.281601459147811	0.048506243656967964	0.25648668992632384	FALSE	FALSE
ribo	Ara-1	ECB_00932	2524.5190571912963	-7.967165906682107e-4	0.2363730531302341	0.9958525245358191	0.9971914859133462	FALSE	FALSE
ribo	Ara-1	ECB_00933	81272.41549143246	-0.5978200119003453	0.3133970254100409	0.01790498333592815	0.13213877301257762	FALSE	FALSE
ribo	Ara-1	ECB_00934	1410.6517747557525	0.0364745713037146	0.3369166437453411	0.8866305601679365	0.9660088368285906	FALSE	FALSE
ribo	Ara-1	ECB_00935	166.63352747143682	0.2223701087175525	0.3044417438683668	0.3657510641846719	0.7144737181679591	FALSE	FALSE
ribo	Ara-1	ECB_00936	1305.4043336727116	-0.32139613987722515	0.2978860294144289	0.1780430482616453	0.5107992069950409	FALSE	FALSE
ribo	Ara-1	ECB_00937	21.05239517805817	0.03955994114211457	0.3639365924802171	0.8744454292903886	0.963377564295883	FALSE	FALSE
ribo	Ara-1	ECB_00938	4.592033712573045	-0.14239974775718878	0.4867712079028792	0.4085405237759293	NA	FALSE	FALSE
ribo	Ara-1	ECB_00939	12.805922044342111	-0.1483659979587413	0.45796877913695216	0.4857218773139033	0.7938663129431094	FALSE	FALSE
ribo	Ara-1	ECB_00940	5.216599828701208	0.009011873447958374	0.4626343417157614	0.9580863316578678	NA	FALSE	FALSE
ribo	Ara-1	ECB_00941	9.475200661975501	0.11181963475962395	0.4546742916517708	0.5863633712115419	0.848689622321252	FALSE	FALSE
ribo	Ara-1	ECB_00942	1.2163063706850024	0.03536802590911518	0.47834236299483895	0.7903577317455279	NA	FALSE	FALSE
ribo	Ara-1	ECB_00943	0.5979113137338499	-0.0662650762687309	0.49730021582244244	0.542303356492124	NA	FALSE	FALSE
ribo	Ara-1	ECB_00944	8.010694822225057	-0.17780220793601118	0.453515714038108	0.4401227082957244	NA	FALSE	FALSE
ribo	Ara-1	ECB_00945	14.854727175470014	-0.07809271301906422	0.39405822839614074	0.7474722383928969	0.9226851433481728	FALSE	FALSE
ribo	Ara-1	ECB_00946	2.8276156206995147	-0.23221946607251098	0.5414956095741666	0.18359683571873867	NA	FALSE	FALSE
ribo	Ara-1	ECB_00947	4.869780790323337	0.29699482651012243	0.5244256926513821	0.21130695174514877	NA	FALSE	FALSE
ribo	Ara-1	ECB_00948	6.170168127362491	-0.18119057194120938	0.4695992985201742	0.4074486010093707	NA	FALSE	FALSE
ribo	Ara-1	ECB_00949	192.95526158705113	0.9785841098002183	0.587665744178527	0.014118061180954114	0.11459864920452946	FALSE	FALSE
ribo	Ara-1	ECB_00950	121.57881157737368	0.08678825069272672	0.2747069371845063	0.7067085683873934	0.903943677641067	FALSE	FALSE
ribo	Ara-1	ECB_00951	287.211297087621	-0.31219415452486704	0.30926492617300544	0.20128399061776334	0.5415773696457444	FALSE	FALSE
ribo	Ara-1	ECB_00952	351.5553960769492	0.3461752395281103	0.3812681929512236	0.2092107396008718	0.5528580099569609	FALSE	FALSE
ribo	Ara-1	ECB_00953	221.465317557089	-0.1419388361140922	0.29552281510667483	0.5484428290884038	0.8302194565651532	FALSE	FALSE
ribo	Ara-1	ECB_00954	40.61802426831661	-0.05977156572572719	0.33400463236824596	0.8082012380544037	0.9466025468786383	FALSE	FALSE
ribo	Ara-1	ECB_00955	148.992027808263	-0.22323834343245957	0.3028896952478999	0.35356242910180136	0.7124027452997602	FALSE	FALSE
ribo	Ara-1	ECB_00956	55.372764198784	-0.2901368445931674	0.34007711989902867	0.2560193751771222	0.6160595465691817	FALSE	FALSE
ribo	Ara-1	ECB_00957	551.9006480333449	-0.7593174006120469	0.5195822890531361	0.02226234049574369	0.1521089732495882	FALSE	FALSE
ribo	Ara-1	ECB_00958	733.5299208504634	0.3146540453237945	0.3417241096088857	0.23037097531033487	0.5870617069713324	FALSE	FALSE
ribo	Ara-1	ECB_00959	197.51555692932263	0.019956852569985684	0.29835441098082227	0.9350067642498623	0.9772168026934688	FALSE	FALSE
ribo	Ara-1	ECB_00960	71.48797003363774	-0.4179425980540729	0.36530549233825155	0.12078880002187313	0.4270773594760076	FALSE	FALSE
ribo	Ara-1	ECB_00961	7898.830995263915	0.37742083702296675	0.2641273223310117	0.09692725783627527	0.3778377241514646	FALSE	FALSE
ribo	Ara-1	ECB_00962	47.106539087733104	-1.3664308098397469	0.5615054584210881	0.0012647130136527731	0.019521140247003167	FALSE	FALSE
ribo	Ara-1	ECB_00963	20.7808829781824	0.008856958805944306	0.38096129100001425	0.973056246721655	0.9886412229953744	FALSE	FALSE
ribo	Ara-1	ECB_00964	59.58567064543064	0.20661432717502565	0.3264028011425898	0.41296965952377546	0.7505071892550894	FALSE	FALSE
ribo	Ara-1	ECB_00965	85.80558072223752	0.29083426627644854	0.33927838045566505	0.26384733348178774	0.6250656326051595	FALSE	FALSE
ribo	Ara-1	ECB_00966	105.86423730982446	-0.17863666784754065	0.3074684530385854	0.459048795423182	0.7816086923998486	FALSE	FALSE
ribo	Ara-1	ECB_00967	324.8922171298429	-0.1095280147094762	0.2939488589562065	0.6401796440423578	0.8744131864292453	FALSE	FALSE
ribo	Ara-1	ECB_00968	4.202827267405716	0.10412291462625782	0.46200371398892126	0.5858600057138178	NA	FALSE	FALSE
ribo	Ara-1	ECB_00969	255.38992808362934	-0.05101070110730747	0.2664634774991271	0.8188095400332027	0.9466025468786383	FALSE	FALSE
ribo	Ara-1	ECB_00970	61.301346909448114	-0.12721617375684585	0.32767645649523935	0.6057307170988149	0.8548734829175411	FALSE	FALSE
ribo	Ara-1	ECB_00971	273.6095472405319	0.24161009846905432	0.34474128604698767	0.35271182649804816	0.7124027452997602	FALSE	FALSE
ribo	Ara-1	ECB_00972	28.43449845543199	0.04637605295662684	0.3507084814227656	0.8531776328850524	0.9550019059078281	FALSE	FALSE
ribo	Ara-1	ECB_00973	46.962067392581375	-0.12108262736999555	0.3213999861984132	0.6220665208633029	0.8626326732759536	FALSE	FALSE
ribo	Ara-1	ECB_00974	1203.6452059177384	-0.7380357625738284	0.28492042656598693	0.002350279981615744	0.031917900308940136	FALSE	FALSE
ribo	Ara-1	ECB_00975	6.244260714932619	-0.1769379617508418	0.47736661245602063	0.39782043664547245	NA	FALSE	FALSE
ribo	Ara-1	ECB_00976	7.401463129181563	-0.30008793490204533	0.5525939295965646	0.17099955750226206	NA	FALSE	FALSE
ribo	Ara-1	ECB_00977	1.19436988538874	-0.11811985754624442	0.5083942434136743	0.2410360055844078	NA	FALSE	FALSE
ribo	Ara-1	ECB_00978	2.59635451695389	-0.0026619133640329315	0.4645674360271678	0.9857448877446457	NA	FALSE	FALSE
ribo	Ara-1	ECB_00979	1.6951877816698309	-0.1786650925239248	0.5303997482273299	0.11646164380717768	NA	FALSE	FALSE
ribo	Ara-1	ECB_00980	2.5872818612865776	0.02865431210084805	0.4664735193498662	0.8614894462836559	NA	FALSE	FALSE
ribo	Ara-1	ECB_00981	40.5820736117074	-0.9020300424872608	0.6856874345018908	0.01845467919068213	0.13311498622044085	FALSE	FALSE
ribo	Ara-1	ECB_00982	23.986512189216498	-1.0381893447317012	0.7628862693498681	0.014674563996959605	0.11644984436876019	FALSE	FALSE
ribo	Ara-1	ECB_00983	16.77850384237817	-0.870448643522543	0.7199753733221846	0.02718663153919213	0.1761960531446705	FALSE	FALSE
ribo	Ara-1	ECB_00984	16.212002935094628	-0.15864290853862606	0.401809505189601	0.5232740437207039	0.8131629505706712	FALSE	FALSE
ribo	Ara-1	ECB_00985	2.1190572556852296	-0.13045598253825832	0.49662395693653294	0.3576199897735314	NA	FALSE	FALSE
ribo	Ara-1	ECB_00986	1.933887657277057	-0.20814048305471633	0.5445505294554412	0.08805744204400368	NA	FALSE	FALSE
ribo	Ara-1	ECB_00987	8.910590789564038	0.12160273380382765	0.425047929837711	0.6044723379202097	0.8548520547467031	FALSE	FALSE
ribo	Ara-1	ECB_00988	0.12329239785853273	-0.01563414401276606	0.49482465459085223	0.9268960539205255	NA	FALSE	FALSE
ribo	Ara-1	ECB_00989	0.24307822482844946	-0.025935155543571353	0.49488609112754994	0.919978338421996	NA	FALSE	FALSE
ribo	Ara-1	ECB_00990	1.971642358042601	-0.20437438175305184	0.5433090367258666	0.08686886588879102	NA	FALSE	FALSE
ribo	Ara-1	ECB_00991	0.37936089854752364	-0.0379443765421372	0.4952364089290983	0.7862320059094507	NA	FALSE	FALSE
ribo	Ara-1	ECB_00992	29.34428995367511	0.4827177362327385	0.5470986153849281	0.116057142254373	0.4194553421189839	FALSE	FALSE
ribo	Ara-1	ECB_00993	4.589626214140034	0.15195582972384034	0.4675206757187216	0.46676883783108203	NA	FALSE	FALSE
ribo	Ara-1	ECB_00994	49.045909838254765	-1.4368284888046332	0.5112229927724238	4.260538061874754e-4	0.008295518226356139	FALSE	TRUE
ribo	Ara-1	ECB_00995	4.551045480471547	-0.20738104246623024	0.5067785605803476	0.29443061847742635	NA	FALSE	FALSE
ribo	Ara-1	ECB_00996	17.339466168023076	-0.7335142455831131	0.6326980636965839	0.04208760333527727	0.2337802951401661	FALSE	FALSE
ribo	Ara-1	ECB_00997	16.360341307015958	-0.8991827071611964	0.8879671498776479	0.02704877837200452	0.17593517635415168	FALSE	FALSE
ribo	Ara-1	ECB_00998	33.09594667647052	-0.3322040227549602	0.38572661616431636	0.21729156327843	0.5648442993075419	FALSE	FALSE
ribo	Ara-1	ECB_00999	5.085626355405013	-0.31869058612676626	0.5900291472531735	0.12664521820944483	NA	FALSE	FALSE
ribo	Ara-1	ECB_01000	8.958461809945728	-0.1800389466925508	0.4787277646638099	0.38537779962478524	0.731235965020532	FALSE	FALSE
ribo	Ara-1	ECB_01001	1.8185733818280543	0.06802824893408993	0.4763950242313942	0.6510936918300188	NA	FALSE	FALSE
ribo	Ara-1	ECB_01002	30.641328880770967	-1.070422694324465	0.6438613835810303	0.009592182514521682	0.08957715269830749	FALSE	FALSE
ribo	Ara-1	ECB_01003	98.84314344221372	-0.4450824761091147	0.41077769477112763	0.11242906148767712	0.41337041254577556	FALSE	FALSE
ribo	Ara-1	ECB_01004	2.889436905907403	-0.1464480341047096	0.49316431403457345	0.3893608500880619	NA	FALSE	FALSE
ribo	Ara-1	ECB_01005	60.4571694526162	0.11747253658035903	0.35487691867105237	0.6433198812642571	0.8750563187352711	FALSE	FALSE
ribo	Ara-1	ECB_01006	391.47591771459867	-0.33153973119527924	0.363308308787868	0.20546081117441836	0.54893969191802	FALSE	FALSE
ribo	Ara-1	ECB_01007	55.682134465867094	-0.4661919535941833	0.43012872202615127	0.10605800805353324	0.3984196796866022	FALSE	FALSE
ribo	Ara-1	ECB_01008	2.0185837679416077	-0.12184669450607781	0.4983193019767511	0.3667387319488487	NA	FALSE	FALSE
ribo	Ara-1	ECB_01009	8.537876790941391	-0.005670365606725866	0.4134195703956609	0.9790521904806379	0.9910283640644989	FALSE	FALSE
ribo	Ara-1	ECB_01010	4.955270553972345	0.19368894593292746	0.4820178894090956	0.36063009642218896	NA	FALSE	FALSE
ribo	Ara-1	ECB_01011	5.791514693159073	-0.14029563719040847	0.4647874709498629	0.49361376110523486	NA	FALSE	FALSE
ribo	Ara-1	ECB_01012	1.893680579895008	-0.22581044633421063	0.5526545166701647	0.08305861028162094	NA	FALSE	FALSE
ribo	Ara-1	ECB_01013	1.152589304776564	0.03907627304892261	0.4819103600747447	0.7495648440336786	NA	FALSE	FALSE
ribo	Ara-1	ECB_01014	0.8840076431876526	-0.015209923678692804	0.48284615440882434	0.9092215236260308	NA	FALSE	FALSE
ribo	Ara-1	ECB_01015	2.331395280365307	0.10209169134704421	0.47680199743108576	0.5430105577515083	NA	FALSE	FALSE
ribo	Ara-1	ECB_01016	43.86815069966567	0.7646950269609771	0.3933375927198413	0.01254369823686957	0.10658051259803293	FALSE	FALSE
ribo	Ara-1	ECB_01017	276.96035815962273	-0.4357360808446526	0.4800245075655373	0.1250033273965969	0.43345140533585363	FALSE	FALSE
ribo	Ara-1	ECB_01018	808.228927647206	0.07810853925336689	0.3247504128862368	0.7538435370997585	0.9262644277880009	FALSE	FALSE
ribo	Ara-1	ECB_01019	236.32753789433443	-0.04869177680267939	0.40095262230751516	0.8336162351927846	0.9484268248875608	FALSE	FALSE
ribo	Ara-1	ECB_01020	1853.5788255518062	-0.34078746940244625	0.44889579669502594	0.20680133913557236	0.5508346731331908	FALSE	FALSE
ribo	Ara-1	ECB_01021	437.16379108015474	-0.42226130379244897	0.48273029713598387	0.1326574671214862	0.4470436589987641	FALSE	FALSE
ribo	Ara-1	ECB_01022	225.16579836150777	-1.1932544822759201	0.706528046203508	0.005207830822454996	0.058543879321107294	FALSE	FALSE
ribo	Ara-1	ECB_01023	2.8657644040380745	-0.12200997115863733	0.48346260783343614	0.4655875634568445	NA	FALSE	FALSE
ribo	Ara-1	ECB_01024	1.5684820152223728	0.11017266103560995	0.4869078693255413	0.46552473667220223	NA	FALSE	FALSE
ribo	Ara-1	ECB_01025	1.9969091795401837	-0.11686324015780275	0.49715888731017754	0.3796641451170798	NA	FALSE	FALSE
ribo	Ara-1	ECB_01026	2.600332517722703	-0.03814040190716723	0.47012460585665045	0.8066222628397175	NA	FALSE	FALSE
ribo	Ara-1	ECB_01027	4.368611397413393	-2.347516253949782	2.8328361955822463	0.0066031104719720905	NA	FALSE	FALSE
ribo	Ara-1	ECB_01030	430.037643365758	-0.25044430682819074	0.270879100582969	0.2676051746365474	0.6301943203496244	FALSE	FALSE
ribo	Ara-1	ECB_01031	349.65001430317096	-0.0041998630591362374	0.3006530750256397	0.9840296555285546	0.9923575977723643	FALSE	FALSE
ribo	Ara-1	ECB_01032	218.9722781058108	-0.0718974591410242	0.28542090746602644	0.75651935268847	0.926293116177128	FALSE	FALSE
ribo	Ara-1	ECB_01033	26.697764256237097	-0.022424454475241835	0.35551474426944	0.9265141466995168	0.976088914111246	FALSE	FALSE
ribo	Ara-1	ECB_01034	13.459890450046805	-0.007038061066907142	0.38495091415752614	0.9758235354654409	0.9893136365048125	FALSE	FALSE
ribo	Ara-1	ECB_01035	0.24658479571706546	-0.021548458070208113	0.4951120507768313	0.9265687553134567	NA	FALSE	FALSE
ribo	Ara-1	ECB_01036	0.4555911253558825	0.0336452895390548	0.48984477590918146	0.6893604405292817	NA	FALSE	FALSE
ribo	Ara-1	ECB_01037	2.2351616359191744	0.0313301740392098	0.46848831598582963	0.8413327096068532	NA	FALSE	FALSE
ribo	Ara-1	ECB_01038	0.37936089854752364	-0.0379443765421372	0.4952364089290983	0.7862320059094507	NA	FALSE	FALSE
ribo	Ara-1	ECB_01039	28.9081839244411	-1.9172034213147238	0.6322245761284937	2.0560999378819596e-4	0.004344057953865502	FALSE	TRUE
ribo	Ara-1	ECB_01040	1.216843866221207	-0.1439410593527778	0.5148231850509377	0.20001631758827734	NA	FALSE	FALSE
ribo	Ara-1	ECB_01041	132.1143791899631	-5.681190726949754	0.8154685725616608	1.5861917844917064e-12	1.2770987367569713e-10	FALSE	TRUE
ribo	Ara-1	ECB_01042	35.15735902738101	-0.10107580880598961	0.35768619510151517	0.6853005397867613	0.8868420104364735	FALSE	FALSE
ribo	Ara-1	ECB_01043	37.70969764801634	-0.7361991414052087	0.525006578363369	0.02906135974903928	0.18187771153863028	FALSE	FALSE
ribo	Ara-1	ECB_01044	15.796008722468578	0.3877678734876171	0.5045615865475428	0.17424528356371372	0.5069108395862335	FALSE	FALSE
ribo	Ara-1	ECB_01045	513.1148473788321	-0.2405833420822991	0.32947876208399807	0.33489947025685934	0.694753148952078	FALSE	FALSE
ribo	Ara-1	ECB_01046	442.1531493324585	-0.1768996704390838	0.27424843348903344	0.4365698055797692	0.7663768125056762	FALSE	FALSE
ribo	Ara-1	ECB_01047	12.774382418268914	-0.09025071353331773	0.4086973368335356	0.7035568261292071	0.9024392534953556	FALSE	FALSE
ribo	Ara-1	ECB_01048	32.788484830510974	-0.13063310559295274	0.3484567374387737	0.6022323987506063	0.8543096742276458	FALSE	FALSE
ribo	Ara-1	ECB_01049	28.38688338151129	-1.0950356731317257	0.735619106540338	0.01152862276615685	0.10160877875852442	FALSE	FALSE
ribo	Ara-1	ECB_01050	95.62233271787028	0.24815758995481701	0.3414408897245083	0.33832709766203617	0.696047254098899	FALSE	FALSE
ribo	Ara-1	ECB_01051	69.70537955153485	0.5330348276963937	0.4077133754067042	0.07228576595046722	0.31574676945226077	FALSE	FALSE
ribo	Ara-1	ECB_01052	110.77395079611266	0.25983626849196695	0.33244620026617266	0.31036161869271095	0.6768427980128741	FALSE	FALSE
ribo	Ara-1	ECB_01053	10.238812631523801	-0.007065658324427419	0.40723636239801864	0.9745495775168465	0.9888226128823862	FALSE	FALSE
ribo	Ara-1	ECB_01054	1.8425920328264187	0.087962692782884	0.4788673861602691	0.5676142092156007	NA	FALSE	FALSE
ribo	Ara-1	ECB_01055	202.3378334337865	-0.6860269660639098	0.34348649235085194	0.011870626760829337	0.10400763858973705	FALSE	FALSE
ribo	Ara-1	ECB_01056	12.87599269086663	-0.0699357304316773	0.4046124739644117	0.7685003112944717	0.9313923626306881	FALSE	FALSE
ribo	Ara-1	ECB_01057	27.772048183507795	-0.34267553630459674	0.4420146364467173	0.20899319661109214	0.5528580099569609	FALSE	FALSE
ribo	Ara-1	ECB_01058	320.5182956053337	0.2456540391369385	0.41622043575401535	0.35544492476115686	0.7124027452997602	FALSE	FALSE
ribo	Ara-1	ECB_01059	215.3865053677842	-0.06081728872137759	0.30675550593382145	0.7994391173813282	0.9435535383038736	FALSE	FALSE
ribo	Ara-1	ECB_01060	90.05944709626732	-0.29888423258832664	0.3091846452346919	0.22292310993496658	0.5739740229008344	FALSE	FALSE
ribo	Ara-1	ECB_01061	130.30295216170555	-0.7579391656235135	0.3360852313462893	0.0055874815526999275	0.06142106105348002	FALSE	FALSE
ribo	Ara-1	ECB_01062	245.4790125179909	-0.12015676127286926	0.29343055305433596	0.6094211813371923	0.8559479958526618	FALSE	FALSE
ribo	Ara-1	ECB_01063	321.5938512323712	-0.4947299144008695	0.3173973390978513	0.05022956091176266	0.2602328034019843	FALSE	FALSE
ribo	Ara-1	ECB_01064	188.21640076023095	-0.36868671927031843	0.3940442596540913	0.17323319075710136	0.5059428188876519	FALSE	FALSE
ribo	Ara-1	ECB_01065	101.95576672577074	0.2745607220327106	0.3478768842586605	0.2947525737784779	0.6604002641372528	FALSE	FALSE
ribo	Ara-1	ECB_01066	324.9870788110077	-3.4473118154403357	0.4343718059883541	6.347935172217345e-17	6.814187733254698e-15	FALSE	TRUE
ribo	Ara-1	ECB_01067	545.2199241907418	-3.9404426791881386	0.4901612185032766	3.2021329006486033e-17	3.668905350396996e-15	FALSE	TRUE
ribo	Ara-1	ECB_01068	526.8004191596137	-3.516423451208283	0.44540456293091374	8.031311884288748e-17	8.250095897688337e-15	FALSE	TRUE
ribo	Ara-1	ECB_01069	818.3009767610637	-3.2773517866038286	0.3816036381518189	3.517606699659213e-19	5.5152370306762083e-17	FALSE	TRUE
ribo	Ara-1	ECB_01070	1396.9756768980023	-3.8668038016447683	0.47828979792201337	1.2203592822552977e-17	1.5806305660167529e-15	FALSE	TRUE
ribo	Ara-1	ECB_01071	1206.7703691338825	-3.6916879639382905	0.33366066755076673	4.631414974787162e-30	1.7246231512363693e-27	FALSE	TRUE
ribo	Ara-1	ECB_01072	6207.250586738308	-4.147544828762828	0.3378185081137802	2.3720191712773598e-36	2.3554150370784185e-33	FALSE	TRUE
ribo	Ara-1	ECB_01073	676.3209691979619	-4.034966421663596	0.33413897203035975	5.028814318612258e-35	2.996167571029183e-32	FALSE	TRUE
ribo	Ara-1	ECB_01074	1664.286468602651	-4.151991647143092	0.32383779700541654	2.646981835349638e-39	3.9426794437532855e-36	FALSE	TRUE
ribo	Ara-1	ECB_01075	247.53650339859556	-4.522241530742151	0.46913458821188353	4.9791476085747184e-23	1.1409908250726221e-20	FALSE	TRUE
ribo	Ara-1	ECB_01076	688.9507168111303	-4.288246426154904	0.40808704028902903	1.4808558736608972e-27	4.411469647635812e-25	FALSE	TRUE
ribo	Ara-1	ECB_01077	216.27669033477835	-4.3039980617352285	0.46211648307951325	8.836600319609727e-22	1.6452645220073361e-19	FALSE	TRUE
ribo	Ara-1	ECB_01078	605.3340233893737	-4.160410229875894	0.3717606011589806	1.4976276958828354e-30	6.373475580049952e-28	FALSE	TRUE
ribo	Ara-1	ECB_01079	494.34466303975637	-3.625157907603851	0.4365320582839631	2.2920170357529223e-18	3.413959374753977e-16	FALSE	TRUE
ribo	Ara-1	ECB_01080	1251.4172855121708	0.09682076704671475	0.248073880915668	0.6543651846000357	0.8788791185408054	FALSE	FALSE
ribo	Ara-1	ECB_01081	24.584321811906033	0.5357436586628174	0.49794286726887144	0.08536675459732722	0.349747274876623	FALSE	FALSE
ribo	Ara-1	ECB_01082	66.48523313166939	-0.02681103191289556	0.3482284900129945	0.9123729078762067	0.97174075529611	FALSE	FALSE
ribo	Ara-1	ECB_01083	48.457936149763576	-0.407000991517889	0.38119486398707614	0.13587782029849282	0.4525892166537393	FALSE	FALSE
ribo	Ara-1	ECB_01084	332.7197855142806	0.5434727237038273	0.37996358878573083	0.060035494351366826	0.28478620648522573	FALSE	FALSE
ribo	Ara-1	ECB_01085	825.5657242160431	0.2253833923943166	0.30016635595690677	0.35558040250801626	0.7124027452997602	FALSE	FALSE
ribo	Ara-1	ECB_01086	108.79647194537803	0.4865752290522833	0.362434211051335	0.08031415913053389	0.3354090226007815	FALSE	FALSE
ribo	Ara-1	ECB_01087	715.6697368421942	0.03684250366106437	0.29326051347927246	0.8811421236150877	0.9639947629311393	FALSE	FALSE
ribo	Ara-1	ECB_01088	903.3635520754066	0.05248234000814056	0.25070404143283537	0.812864669955454	0.9466025468786383	FALSE	FALSE
ribo	Ara-1	ECB_01089	1566.5652200569891	-0.21153695420697202	0.28998060155303845	0.3674053129799696	0.7145872803348582	FALSE	FALSE
ribo	Ara-1	ECB_01090	4774.158554593564	-0.28346538873909244	0.25803743956046166	0.19543656809325893	0.534624000321229	FALSE	FALSE
ribo	Ara-1	ECB_01091	1763.191086862865	0.03404160401799881	0.2750601240587447	0.8832800805960046	0.964549618803335	FALSE	FALSE
ribo	Ara-1	ECB_01092	28.204406568937607	-0.15915763740324615	0.36132301257535815	0.5298807816560889	0.8151702815594589	FALSE	FALSE
ribo	Ara-1	ECB_01093	51.484000602961075	-0.11099100579245719	0.3187101195401359	0.6491104410540846	0.8773593484120318	FALSE	FALSE
ribo	Ara-1	ECB_01094	94.1183469457065	0.17163236214474129	0.2883508872901046	0.4689299826796879	0.7866694040385083	FALSE	FALSE
ribo	Ara-1	ECB_01095	53.61938378667241	0.17648151835330173	0.3138211140131092	0.47422628309783793	0.789122952137779	FALSE	FALSE
ribo	Ara-1	ECB_01096	353.84556049977704	-0.3840255183887575	0.31560469422318327	0.12260234331652989	0.4281739516294754	FALSE	FALSE
ribo	Ara-1	ECB_01097	4095.736148377271	0.2150596824461321	0.29282758453623503	0.36956209835781817	0.7148866824726885	FALSE	FALSE
ribo	Ara-1	ECB_01098	1546.1210327847625	-0.13353908925506164	0.4887614317412992	0.40799216672181315	0.7498392292438227	FALSE	FALSE
ribo	Ara-1	ECB_01099	406.1335532496385	-0.6802912652576338	0.34887592615681096	0.013144572532060339	0.10999348756462851	FALSE	FALSE
ribo	Ara-1	ECB_01100	43.6284473196436	-0.16302574011396329	0.34170339464818383	0.5159545230586797	0.8104561270258305	FALSE	FALSE
ribo	Ara-1	ECB_01101	133.61307316404418	-0.394693897735706	0.3442627739177654	0.12954098813220918	0.44204192857485813	FALSE	FALSE
ribo	Ara-1	ECB_01102	19.755356344200695	-0.03702197195110374	0.3669738698912773	0.8797337146635283	0.9639947629311393	FALSE	FALSE
ribo	Ara-1	ECB_01103	173.89387541443313	-0.06566682082986235	0.29230808038386596	0.7781248769898819	0.9362011343105242	FALSE	FALSE
ribo	Ara-1	ECB_01104	285.4643858281683	0.10788991453173577	0.32833566400535097	0.6665639666771077	0.8824245183867696	FALSE	FALSE
ribo	Ara-1	ECB_01105	1632.6609095543292	0.03027893136852094	0.3370942567138399	0.9054590922512158	0.9694208370851878	FALSE	FALSE
ribo	Ara-1	ECB_01106	7.285781307406427	-0.3942451112565542	0.6040208844311138	0.1256129681869991	NA	FALSE	FALSE
ribo	Ara-1	ECB_01107	36.57204206774074	-0.8034224326861387	0.5320483504566572	0.021331022748297332	0.14675546597500636	FALSE	FALSE
ribo	Ara-1	ECB_01108	21.38654042288791	0.4203185664487204	0.441827525920884	0.14702759291921016	0.46844406342922684	FALSE	FALSE
ribo	Ara-1	ECB_01109	30.808744489576917	-0.052132239345515884	0.3678538847300242	0.8323474854998663	0.9484268248875608	FALSE	FALSE
ribo	Ara-1	ECB_01110	411.6922223825927	-0.3602140938399587	0.3084863266682016	0.14112740796347492	0.4603095758237241	FALSE	FALSE
ribo	Ara-1	ECB_01111	1.30805781712418	0.01920449921470413	0.4783364628271503	0.8820457624493467	NA	FALSE	FALSE
ribo	Ara-1	ECB_01112	188.77448151363723	-0.2920209714112903	0.29248277582052884	0.21838460807825377	0.5666966441333781	FALSE	FALSE
ribo	Ara-1	ECB_01113	205.40278054258613	0.030073018470750765	0.3023865766843205	0.9019491500494601	0.9684721821852255	FALSE	FALSE
ribo	Ara-1	ECB_01114	169.82641329008774	-0.2360667608895223	0.32472169430906384	0.3421915898594074	0.7025422096424361	FALSE	FALSE
ribo	Ara-1	ECB_01118	13.733532779329678	-0.10969693530218654	0.40196494713911346	0.6520864733426446	0.8783300165763871	FALSE	FALSE
ribo	Ara-1	ECB_01119	0.6206037232510074	-0.060363524224944634	0.4972285004905251	0.5451044216361706	NA	FALSE	FALSE
ribo	Ara-1	ECB_01120	1.9430277918064787	0.062391706089269035	0.4747573736427622	0.6804419576923105	NA	FALSE	FALSE
ribo	Ara-1	ECB_01121	1031.7938073496011	0.06457423979879996	0.29845249069826413	0.7893838537933797	0.9392306712216085	FALSE	FALSE
ribo	Ara-1	ECB_01122	48.23628932541693	0.4905316813453225	0.44824600654093466	0.10473982543584963	0.3954625348205273	FALSE	FALSE
ribo	Ara-1	ECB_01123	61.15074237489508	0.7031297785526559	0.4907193807200845	0.036839865785266324	0.21227458447641853	FALSE	FALSE
ribo	Ara-1	ECB_01124	245.1475650950613	0.5506308612707423	0.41671433646863143	0.06808063960128763	0.3042313581097865	FALSE	FALSE
ribo	Ara-1	ECB_01125	97.36852170229629	-0.22804930212144733	0.359509452594997	0.37320082430930673	0.7184727798985043	FALSE	FALSE
ribo	Ara-1	ECB_01126	667.0254388162876	-0.25856103297208594	0.29882830327563764	0.2810678261341688	0.6458985510967821	FALSE	FALSE
ribo	Ara-1	ECB_01127	95.40530100084105	-0.2936459252678938	0.3826063312495915	0.2657837713493771	0.6278904479379812	FALSE	FALSE
ribo	Ara-1	ECB_01128	486.8156846213046	0.15652350858382455	0.267180621577922	0.48894200943073113	0.7962647680333609	FALSE	FALSE
ribo	Ara-1	ECB_01129	916.521611110383	0.42168431930591244	0.43956802852042615	0.151041505398529	0.4736343627181241	FALSE	FALSE
ribo	Ara-1	ECB_01130	56.36332837597536	0.22428268812558494	0.3442766859689444	0.3849414311430273	0.731235965020532	FALSE	FALSE
ribo	Ara-1	ECB_01131	564.7043111276585	0.4120991732651644	0.3274491794467478	0.11404389548067091	0.41652190116162713	FALSE	FALSE
ribo	Ara-1	ECB_01132	30.819937817682757	-0.12132623503085634	0.3937812252269732	0.6225202796026119	0.8626326732759536	FALSE	FALSE
ribo	Ara-1	ECB_01133	19.420247771930363	-0.0628583899006005	0.40528494696684697	0.7904166810179835	0.9392306712216085	FALSE	FALSE
ribo	Ara-1	ECB_01134	5859.11136635907	0.21375442862176938	0.2754464198480453	0.35509560067332824	0.7124027452997602	FALSE	FALSE
ribo	Ara-1	ECB_01135	15.327271592246142	-0.036386606578521746	0.41643839240073277	0.8709238824949063	0.9617281047560111	FALSE	FALSE
ribo	Ara-1	ECB_01136	3.8383191618895536	-0.046964744096206705	0.4587695663848038	0.7922301217198761	NA	FALSE	FALSE
ribo	Ara-1	ECB_01137	77.14034192232013	0.1784004649410454	0.30741198774591905	0.465970285602695	0.784810389156236	FALSE	FALSE
ribo	Ara-1	ECB_01138	104.67608278045319	-0.0514233699242633	0.36358697914748106	0.8338133113059825	0.9484268248875608	FALSE	FALSE
ribo	Ara-1	ECB_01139	4.365292093792315	0.35164060294485605	0.5768387810627083	0.14490240708468363	NA	FALSE	FALSE
ribo	Ara-1	ECB_01140	0.7332077138485444	0.017451097894562013	0.48661555153560193	0.8641062478374016	NA	FALSE	FALSE
ribo	Ara-1	ECB_01141	0.5611819741761875	0.13711004564856027	0.5180393681352268	0.1818417881071558	NA	FALSE	FALSE
ribo	Ara-1	ECB_01142	0.24658479571706546	-0.021548458070208113	0.4951120507768313	0.9265687553134567	NA	FALSE	FALSE
ribo	Ara-1	ECB_01143	3.7674624536061305	-0.025494496328711088	0.45567699298417547	0.8860552609387105	NA	FALSE	FALSE
ribo	Ara-1	ECB_01144	1.5263236836036462	-0.068624424942834	0.48444817772439724	0.575048239557734	NA	FALSE	FALSE
ribo	Ara-1	ECB_01146	1.2108063515623138	-0.048585245936886706	0.48532742247822214	0.6830990585489136	NA	FALSE	FALSE
ribo	Ara-1	ECB_01147	1.0283212797996926	-0.028845972635630608	0.4846356001141532	0.8055948196195158	NA	FALSE	FALSE
ribo	Ara-1	ECB_01148	0.23957165393983346	-0.021054641086711602	0.4951108552426235	0.9325609847475668	NA	FALSE	FALSE
ribo	Ara-1	ECB_01149	182.6216115389268	0.16289665929321948	0.2987615428907989	0.49984286155514346	0.8027126062386913	FALSE	FALSE
ribo	Ara-1	ECB_01150	542.7888823553625	-0.057374466811660606	0.2524852927286441	0.7900196030591325	0.9392306712216085	FALSE	FALSE
ribo	Ara-1	ECB_01151	138.2607579850503	-0.1979926570611779	0.309236225153448	0.413092212542639	0.7505071892550894	FALSE	FALSE
ribo	Ara-1	ECB_01152	35.62026287646957	-0.3429162432682139	0.42090492745702396	0.20745910882332833	0.5508346731331908	FALSE	FALSE
ribo	Ara-1	ECB_01153	894.3702312884735	-0.13787315992395385	0.28175190706165976	0.5492204356414769	0.8302194565651532	FALSE	FALSE
ribo	Ara-1	ECB_01154	101.33399564250848	-0.6120851667004733	0.4017221373902947	0.0357408000746325	0.20893383145590966	FALSE	FALSE
ribo	Ara-1	ECB_01155	168.40209249394624	-2.306086783981928	0.5027369126228424	1.7246992124685252e-7	7.038190347868132e-6	FALSE	TRUE
ribo	Ara-1	ECB_01156	62.57123608472344	-0.106856772258725	0.3487017287975659	0.6675604370413771	0.8824245183867696	FALSE	FALSE
ribo	Ara-1	ECB_01158	7.019239637120052	0.03336125024298908	0.4296944003594115	0.8782613581658416	NA	FALSE	FALSE
ribo	Ara-1	ECB_01159	22.495772368324598	-0.5593164619815566	0.5920346921435266	0.07529671653301294	0.3236780931484063	FALSE	FALSE
ribo	Ara-1	ECB_01160	161.213155039233	-0.2475293425809843	0.2973447589661911	0.29998959097247446	0.6646972655586262	FALSE	FALSE
ribo	Ara-1	ECB_01161	299.1308095126083	-0.40313962115091706	0.29769182562225877	0.0945013189501858	0.3709083388044842	FALSE	FALSE
ribo	Ara-1	ECB_01162	293.1192103652058	0.1147027280204576	0.3178329775624279	0.6436775882198653	0.8750563187352711	FALSE	FALSE
ribo	Ara-1	ECB_01163	54.41424014571713	-2.348872944546731	0.6608961080421495	2.1897897738306522e-5	5.722266435299573e-4	FALSE	TRUE
ribo	Ara-1	ECB_01164	493.14358138276526	-1.0319249242498405	0.4941894553042986	0.0037074515897036094	0.046405454982046436	FALSE	FALSE
ribo	Ara-1	ECB_01165	270.0938042564831	-1.188997498387295	0.4789589802186373	0.0011195217433341367	0.01764579509731425	FALSE	FALSE
ribo	Ara-1	ECB_01166	240.11284360943242	-0.02666054452509713	0.2581473360126874	0.9024769310997603	0.9684721821852255	FALSE	FALSE
ribo	Ara-1	ECB_01167	67.68321160724186	-0.5146960570960869	0.37872295300252073	0.06490402645875418	0.29716551271289754	FALSE	FALSE
ribo	Ara-1	ECB_01168	43.7228067103298	-0.05097935096779714	0.3361094409678639	0.8355610813861852	0.9489654828247982	FALSE	FALSE
ribo	Ara-1	ECB_01169	2.017597494337228	-0.04110743444050112	0.4717751533891433	0.7846799316321684	NA	FALSE	FALSE
ribo	Ara-1	ECB_01170	1.9268927020780138	-0.2294935896662122	0.5552390090200532	0.07877879273894468	NA	FALSE	FALSE
ribo	Ara-1	ECB_01171	1.7530315622806911	-0.11985851235228606	0.4937616280248156	0.4093155553082637	NA	FALSE	FALSE
ribo	Ara-1	ECB_01172	23.560195214017764	-0.15179271318794924	0.4034067802203544	0.5419681790909998	0.8266443172084339	FALSE	FALSE
ribo	Ara-1	ECB_01173	379.5276237556998	-0.7050127673422523	0.37195977703798266	0.013485415411489728	0.1116841378230722	FALSE	FALSE
ribo	Ara-1	ECB_01174	197.1724645522636	-0.5328212294411536	0.4307677161921627	0.06791378858619387	0.3042313581097865	FALSE	FALSE
ribo	Ara-1	ECB_01175	385.5687278930077	-0.24817329174235664	0.37038349288353983	0.3348119478205633	0.694753148952078	FALSE	FALSE
ribo	Ara-1	ECB_01176	19.646780034095354	-0.14277907523140462	0.3830286054231478	0.5680951766076306	0.8387916625812754	FALSE	FALSE
ribo	Ara-1	ECB_01177	11.379110330076855	0.10925326843171441	0.4143545138243055	0.6471130824256813	0.8762499420664112	FALSE	FALSE
ribo	Ara-1	ECB_01178	376.2308488250444	0.148644429498016	0.3310908337555421	0.5556816523160806	0.8331029905634646	FALSE	FALSE
ribo	Ara-1	ECB_01179	66.01619444720698	0.37678821862180073	0.36297552278077455	0.1654805079759926	0.49626962148339165	FALSE	FALSE
ribo	Ara-1	ECB_01180	48.562818427552834	0.1104833669258551	0.3569538232362961	0.6626534392821886	0.882071474892192	FALSE	FALSE
ribo	Ara-1	ECB_01181	56.41896376906161	0.20927310595594922	0.3533938116216541	0.4168170187144577	0.75254418106083	FALSE	FALSE
ribo	Ara-1	ECB_01182	825.4417063082699	0.03140015906666926	0.3558759826057783	0.9021661011871092	0.9684721821852255	FALSE	FALSE
ribo	Ara-1	ECB_01183	385.7986764589891	0.43199615059775004	0.4303810199362903	0.13988698136616184	0.4603095758237241	FALSE	FALSE
ribo	Ara-1	ECB_01184	180.92032823802975	0.4036774308729233	0.29537847535161366	0.09967296220259994	0.385117709989034	FALSE	FALSE
ribo	Ara-1	ECB_01185	191.78547434331435	-0.5603106934335634	0.35437904900771283	0.038722834916716006	0.22014375041392556	FALSE	FALSE
ribo	Ara-1	ECB_01186	424.8734674581117	0.006898248352500518	0.34428469982657356	0.9803088540371646	0.9912899104469496	FALSE	FALSE
ribo	Ara-1	ECB_01187	97.48754225165239	-0.053853078865168144	0.35118601132265026	0.8264124762384124	0.9468828631948973	FALSE	FALSE
ribo	Ara-1	ECB_01188	9.8667845735374	-0.14148303912544788	0.42783558466329397	0.5507867923727414	0.830338127415069	FALSE	FALSE
ribo	Ara-1	ECB_01189	134.2601064119511	-0.1752867069940129	0.3165061866312621	0.4733983140086753	0.789122952137779	FALSE	FALSE
ribo	Ara-1	ECB_01190	587.4732711293561	-0.10214695024345634	0.3071735341664332	0.6692016600184818	0.8824930257614242	FALSE	FALSE
ribo	Ara-1	ECB_01191	3.9171784961734963	0.04595515406566862	0.45376533326277385	0.8099248844861384	NA	FALSE	FALSE
ribo	Ara-1	ECB_01194	71.59433915116878	-0.052193758848625024	0.3357164706179211	0.8306143217314456	0.9484268248875608	FALSE	FALSE
ribo	Ara-1	ECB_01195	7.924114440014153	-0.07800691130803902	0.43711784238375656	0.7141143923290626	NA	FALSE	FALSE
ribo	Ara-1	ECB_01196	223.22486098328878	-0.8831862187153701	0.3872218303682987	0.003582389460328785	0.045050222832526535	FALSE	FALSE
ribo	Ara-1	ECB_01197	175.20256018196778	-0.264580616386454	0.2868355842943479	0.25912834488301567	0.620034810768276	FALSE	FALSE
ribo	Ara-1	ECB_01198	36.22247612551685	-0.03752511916122616	0.35106566710353193	0.8779272319946657	0.9639947629311393	FALSE	FALSE
ribo	Ara-1	ECB_01199	150.1133868694851	-0.2813215398790172	0.30535079012398253	0.24630033831150827	0.6052142008751955	FALSE	FALSE
ribo	Ara-1	ECB_01200	62.879743433615616	-0.46176656019755613	0.39364273070054634	0.09779416458880247	0.37946866072174407	FALSE	FALSE
ribo	Ara-1	ECB_01201	144.61447012133314	0.16756545698488823	0.40052832578812636	0.5120800644178105	0.80970621650778	FALSE	FALSE
ribo	Ara-1	ECB_01202	701.3930263226393	0.3822095148600857	0.6650954808582922	0.07915407295033153	0.33352190002692733	FALSE	FALSE
ribo	Ara-1	ECB_01203	276.632788852749	0.4048444099320357	0.7082157074337443	0.05658155431211911	0.27696444062166314	FALSE	FALSE
ribo	Ara-1	ECB_01204	74.76300878951803	0.2524898595774102	0.5571230908921785	0.15373034542373695	0.4770444781430337	FALSE	FALSE
ribo	Ara-1	ECB_01205	138.83341416220995	0.1936474841925455	0.5210413371607421	0.24468985746988559	0.6034197726844281	FALSE	FALSE
ribo	Ara-1	ECB_01206	29.333794941981065	0.6915102122683046	0.4459931818547249	0.030104524310111912	0.18573467945335403	FALSE	FALSE
ribo	Ara-1	ECB_01208	824.6438033288711	-0.4637407173453575	0.34261023640562377	0.07632211514046294	0.3257357894032079	FALSE	FALSE
ribo	Ara-1	ECB_01209	90.03464189847558	0.013255320123453655	0.3209249285731891	0.9568456241264025	0.9838858864535125	FALSE	FALSE
ribo	Ara-1	ECB_01210	94.4157207061452	-0.7400778925741591	0.3846044701425286	0.012140043570655687	0.10513136568890491	FALSE	FALSE
ribo	Ara-1	ECB_01211	42.16043072436534	-0.04857597538354306	0.3211774807972953	0.84145708363043	0.9518954972155099	FALSE	FALSE
ribo	Ara-1	ECB_01212	391.2465200599557	0.03331156375449095	0.2595109315796652	0.8817221791602867	0.9639947629311393	FALSE	FALSE
ribo	Ara-1	ECB_01213	4172.726875270889	-0.3514752759204752	0.25946231065133907	0.11087652040878013	0.4113339405949639	FALSE	FALSE
ribo	Ara-1	ECB_01214	31.181376244516123	-0.0844502978040981	0.3717067251207131	0.7325328732391996	0.9131052324279908	FALSE	FALSE
ribo	Ara-1	ECB_01215	11375.996992536006	0.11615815250915468	0.4008472599063441	0.6273816214780157	0.8646423463821873	FALSE	FALSE
ribo	Ara-1	ECB_01216	18.596067078943236	-0.4431502951685501	0.5214221746523903	0.12929899886075535	0.44204192857485813	FALSE	FALSE
ribo	Ara-1	ECB_01217	1782.4277061773128	-0.6171042167238262	0.4428859072022064	0.040615315212140256	0.22770365943452614	FALSE	FALSE
ribo	Ara-1	ECB_01218	90.29803884972476	-2.0407663777424094	0.6848113495717485	1.2928461358535672e-4	0.0028741706259013257	FALSE	TRUE
ribo	Ara-1	ECB_01219	121.34047502286246	-2.3482609239302845	0.6753906284999175	2.043988774616856e-5	5.38853323856957e-4	FALSE	TRUE
ribo	Ara-1	ECB_01220	153.1619031211818	-0.9757098163522911	0.5361551950474414	0.007417800608913504	0.07567680826696345	FALSE	FALSE
ribo	Ara-1	ECB_01221	212.07796347560327	-1.35910114803295	0.5258932770078801	6.637833555096114e-4	0.011631827153312542	FALSE	FALSE
ribo	Ara-1	ECB_01222	166.76265262191876	-0.01917693440171383	0.305751029980259	0.9348679217754462	0.9772168026934688	FALSE	FALSE
ribo	Ara-1	ECB_01223	166.8107418450964	-0.23976577321279846	0.3321192951133492	0.3378079704341017	0.696047254098899	FALSE	FALSE
ribo	Ara-1	ECB_01224	90.93835866203243	-0.4899522779206782	0.3610392261607716	0.07128476679321834	0.3132113868392292	FALSE	FALSE
ribo	Ara-1	ECB_01225	385.5779996580671	-0.0050595302388545494	0.2813737876595995	0.9808773060271365	0.9915281624210519	FALSE	FALSE
ribo	Ara-1	ECB_01226	226.33805281282434	-0.15997321220058874	0.3973824715536669	0.5175109686666275	0.8104561270258305	FALSE	FALSE
ribo	Ara-1	ECB_01227	67.2074645734316	-0.06804720856132764	0.34338211768427207	0.7821460453586291	0.9380084819337182	FALSE	FALSE
ribo	Ara-1	ECB_01228	32.94527506339454	0.29451266520207026	0.36561960516862824	0.2679528953718181	0.6305147514317899	FALSE	FALSE
ribo	Ara-1	ECB_01229	28.267507079217044	0.027117569848355026	0.3468316978143847	0.9143413857382535	0.9724466219615341	FALSE	FALSE
ribo	Ara-1	ECB_01230	33.294529584903465	0.06533646572466022	0.47474839285633097	0.6762115142310827	0.8842737679678444	FALSE	FALSE
ribo	Ara-1	ECB_01231	2.3482144045848865	0.2215782025966138	0.5211536775700606	0.23687390749511525	NA	FALSE	FALSE
ribo	Ara-1	ECB_01232	2.1651709362607474	0.08737421950390052	0.4790378105807287	0.5728180186193811	NA	FALSE	FALSE
ribo	Ara-1	ECB_01233	0	NA	NA	NA	NA	FALSE	FALSE
ribo	Ara-1	ECB_01234	658.3094443845483	0.5536618718580985	0.331105362430219	0.03920251014767235	0.22244624329507795	FALSE	FALSE
ribo	Ara-1	ECB_01235	1429.8141549003494	0.6047338698786733	0.3402013322512152	0.027966811426533986	0.17858236209609932	FALSE	FALSE
ribo	Ara-1	ECB_01236	816.3494784787	0.1192515280072675	0.28241660250707024	0.6093618450813953	0.8559479958526618	FALSE	FALSE
ribo	Ara-1	ECB_01237	466.3913341642823	-0.10499765803577953	0.36233902032450654	0.6716931882181261	0.8841823292055868	FALSE	FALSE
ribo	Ara-1	ECB_01238	570.4020780157042	-0.16490742110645812	0.3697851516397289	0.5101689815804766	0.8087960773988739	FALSE	FALSE
ribo	Ara-1	ECB_01239	25.941255490878046	0.27617660356570595	0.4110530895842991	0.30237711807950296	0.6657660271683956	FALSE	FALSE
ribo	Ara-1	ECB_01240	41.34118899251316	0.10016665721762578	0.32565101019571513	0.68682064105273	0.888037625736147	FALSE	FALSE
ribo	Ara-1	ECB_01241	168.98971110384457	-0.013993530053604817	0.2606884327428134	0.948464480697968	0.981858636986394	FALSE	FALSE
ribo	Ara-1	ECB_01245	288.23917360182725	1.4533876265915255	0.47377661068571686	2.603116378319807e-4	0.0053851970076491005	FALSE	TRUE
ribo	Ara-1	ECB_01246	173.4812608796632	-0.555278382315645	0.3260317679263544	0.03228478957963285	0.19468904485369687	FALSE	FALSE
ribo	Ara-1	ECB_01247	94.22922218642633	-0.30354037955022917	0.33619798434158055	0.2335128532485853	0.5910236107285775	FALSE	FALSE
ribo	Ara-1	ECB_01248	428.77850101174846	-0.21885108933734218	0.2618673391653592	0.32222356982711986	0.6873056101908489	FALSE	FALSE
ribo	Ara-1	ECB_01249	219.76332920332783	-0.4708472429901035	0.39095611319242657	0.08985938661438042	0.3617447469246477	FALSE	FALSE
ribo	Ara-1	ECB_01250	844.0016847630553	1.3800635145715658	0.39238373947428534	5.883524832685313e-5	0.0014366410226696348	FALSE	TRUE
ribo	Ara-1	ECB_01251	240.8025796453116	-0.9520206734810119	0.3480219784055246	9.296633312817027e-4	0.015515820284278985	FALSE	FALSE
ribo	Ara-1	ECB_01253	368.50656341681747	0.41066030381434293	0.337674552709364	0.1217961301039875	0.4270773594760076	FALSE	FALSE
ribo	Ara-1	ECB_01254	229.5502717657812	-0.16724294640894424	0.27073866624141374	0.4591524711982998	0.7816086923998486	FALSE	FALSE
ribo	Ara-1	ECB_01255	119.47585709906568	-1.1090720637971698	0.38271350810407717	4.4619998820325256e-4	0.008359935628034524	FALSE	TRUE
ribo	Ara-1	ECB_01256	73.64139712124901	-0.3786810253332034	0.3825865305162637	0.15998435294460428	0.4873143020674603	FALSE	FALSE
ribo	Ara-1	ECB_01257	38.2257432290423	-0.179781320913786	0.36190050279289054	0.4773412419443699	0.789122952137779	FALSE	FALSE
ribo	Ara-1	ECB_01258	109.38667155106337	0.551620537650838	0.4953538180363279	0.08373210458250324	0.3448379342286849	FALSE	FALSE
ribo	Ara-1	ECB_01259	58.7218677108171	0.9314301420540356	0.6171858685681337	0.01928097925924728	0.13807220483965782	FALSE	FALSE
ribo	Ara-1	ECB_01260	15.69207476644444	0.0897382399241818	0.38414121306911786	0.7188032293680887	0.909171097304259	FALSE	FALSE
ribo	Ara-1	ECB_01261	156.94671357850828	-0.8975345521329192	0.39357188532123427	0.0035840559957397745	0.045050222832526535	FALSE	FALSE
ribo	Ara-1	ECB_01262	71.89092120734658	0.1692963685742213	0.3660163077028586	0.5110793474189377	0.8087960773988739	FALSE	FALSE
ribo	Ara-1	ECB_01263	1385.5105083195656	0.14728226865242233	0.3118499871821019	0.5485244788575266	0.8302194565651532	FALSE	FALSE
ribo	Ara-1	ECB_01264	308.5561191161032	-1.4158497110819794	0.5553574000363786	6.212399416670214e-4	0.010950732462876074	FALSE	FALSE
ribo	Ara-1	ECB_01265	2983.5222939249525	-0.3758323423090871	0.2680199387214696	0.09501995630593554	0.37196379741837315	FALSE	FALSE
ribo	Ara-1	ECB_01266	5.3686536136199585	0.005336061802833376	0.4428064778371259	0.9794314505803356	NA	FALSE	FALSE
ribo	Ara-1	ECB_01267	42.54833699680971	-0.45089174006348015	0.4083787489011107	0.1125355503775173	0.41337041254577556	FALSE	FALSE
ribo	Ara-1	ECB_01268	44.92020387676454	-0.16252119536486836	0.33611657517512206	0.5141326279899636	0.8099424107784778	FALSE	FALSE
ribo	Ara-1	ECB_01269	54.50554873653175	-0.2732249806052072	0.33773364002063233	0.2832855920803506	0.6478872159020963	FALSE	FALSE
ribo	Ara-1	ECB_01270	56.20954224342383	-0.21918950187316197	0.33446433395354935	0.38429375213831385	0.731235965020532	FALSE	FALSE
ribo	Ara-1	ECB_01271	79.59559309569694	-0.382698105767083	0.34251791678368704	0.14146646945911281	0.4603095758237241	FALSE	FALSE
ribo	Ara-1	ECB_01272	40.8659536220011	0.3741888021717752	0.37177442808456157	0.1712146044352178	0.5025106469088806	FALSE	FALSE
ribo	Ara-1	ECB_01273	62.07872832361472	-0.03266043633844703	0.3132849268901098	0.891463380306543	0.9668878332694049	FALSE	FALSE
ribo	Ara-1	ECB_01274	243.75191125674706	-0.5522138098384749	0.4136169363323801	0.05586933123149432	0.27506972887837733	FALSE	FALSE
ribo	Ara-1	ECB_01275	173.90201453817534	-0.5724163717042369	0.46907724491938185	0.057800078189465365	0.27907039372190817	FALSE	FALSE
ribo	Ara-1	ECB_01276	114.03381809594008	-0.436897358733829	0.3766254198811195	0.10819753924854716	0.40492521284098243	FALSE	FALSE
ribo	Ara-1	ECB_01277	84.08044437908227	-0.06555821984918161	0.36348002804679025	0.7888042783830838	0.9392306712216085	FALSE	FALSE
ribo	Ara-1	ECB_01278	80.05752786952787	0.03235585476570162	0.314643196106314	0.8953134838015943	0.9668878332694049	FALSE	FALSE
ribo	Ara-1	ECB_01279	67.28478193596884	-0.11224494848061702	0.35936942339604355	0.6505311538826275	0.8776152003324404	FALSE	FALSE
ribo	Ara-1	ECB_01280	32.73100351099779	-0.5021226725172668	0.46019042902561846	0.09105776196324107	0.36459821624797734	FALSE	FALSE
ribo	Ara-1	ECB_01281	126.8625996566918	0.05535999706320599	0.2943915508073171	0.816797182827554	0.9466025468786383	FALSE	FALSE
ribo	Ara-1	ECB_01282	25.65316666048551	0.37317981515715865	0.42415837997547634	0.18472686207650793	0.517183033851397	FALSE	FALSE
ribo	Ara-1	ECB_01283	52.610425027846745	-0.2143742070764999	0.34552867420115146	0.39723977617496103	0.7416869302857236	FALSE	FALSE
ribo	Ara-1	ECB_01284	9.051645925338377	0.0488576005201878	0.43225790547227605	0.8200459617973455	0.9466455777694699	FALSE	FALSE
ribo	Ara-1	ECB_01285	67.31759856489884	0.927309500250741	0.3988634173945438	0.0038518381865171205	0.047415809742291336	FALSE	FALSE
ribo	Ara-1	ECB_01286	0.4193992813344247	0.05668173922236075	0.49489440808665436	0.5275300471539053	NA	FALSE	FALSE
ribo	Ara-1	ECB_01287	1.0002868992689533	-0.026811043919965482	0.4845044705065847	0.8204136341071542	NA	FALSE	FALSE
ribo	Ara-1	ECB_01288	0.6224391233759731	-0.07787242766535572	0.4982488957122996	0.49340621894038295	NA	FALSE	FALSE
ribo	Ara-1	ECB_01289	1.7612822280711005	0.10595813709984961	0.4920610984544407	0.43244722789260587	NA	FALSE	FALSE
ribo	Ara-1	ECB_01290	1.6949693529851402	-0.18756432931458863	0.533629458286774	0.11273278815147968	NA	FALSE	FALSE
ribo	Ara-1	ECB_01291	2.5657181655912495	0.4126249636646665	0.6934855706207268	0.0632390733408037	NA	FALSE	FALSE
ribo	Ara-1	ECB_01292	1.0244924314406543	-0.10698804911939291	0.5051203616791518	0.2920830510647847	NA	FALSE	FALSE
ribo	Ara-1	ECB_01293	2.741770281282022	0.04725597016606356	0.45987289203969123	0.7916829461724867	NA	FALSE	FALSE
ribo	Ara-1	ECB_01294	0.8371273919051991	0.11537477446034072	0.5058275936775577	0.21390160011834333	NA	FALSE	FALSE
ribo	Ara-1	ECB_01295	1.844772362233828	0.0586641145233871	0.4747168768887449	0.697541291347773	NA	FALSE	FALSE
ribo	Ara-1	ECB_01296	0.9676016261361116	-0.0047358731344451085	0.4838427169219543	0.9505551667213645	NA	FALSE	FALSE
ribo	Ara-1	ECB_01297	17.175289611731994	0.6941664824585488	0.5456109428073308	0.04222401650635516	0.23380175682608184	FALSE	FALSE
ribo	Ara-1	ECB_01298	52.995319405094115	-0.4346230569264906	0.4337499436590317	0.12565668601277444	0.4342590111740778	FALSE	FALSE
ribo	Ara-1	ECB_01299	92.3825759741407	-0.3449632268061799	0.43263338245677885	0.2028900518007664	0.5440229201750523	FALSE	FALSE
ribo	Ara-1	ECB_01300	246.5121852870329	-0.039629337027590916	0.26289748842615984	0.8574778335303526	0.955820577407613	FALSE	FALSE
ribo	Ara-1	ECB_01301	2843.280952641252	0.08959312924014941	0.2424947010465532	0.6857288787904614	0.8870109986612178	FALSE	FALSE
ribo	Ara-1	ECB_01302	257.5196212900662	-0.19198081768902922	0.28776630983054197	0.41151232989064057	0.7498392292438227	FALSE	FALSE
ribo	Ara-1	ECB_01303	146.1387982627302	-0.4570231200377899	0.41614928427921344	0.1056927330933348	0.39805139302786896	FALSE	FALSE
ribo	Ara-1	ECB_01305	46.17995388439976	-0.10974085429566356	0.3330009855212617	0.6567983642757016	0.8790787788400062	FALSE	FALSE
ribo	Ara-1	ECB_01306	24.46800385890532	-1.045003595254855	0.6054974200455188	0.010121851691610327	0.09192986643081452	FALSE	FALSE
ribo	Ara-1	ECB_01308	8.585499741272168	-0.3174165226903461	0.5375414354807769	0.19412574247980974	0.5333061406514049	FALSE	FALSE
ribo	Ara-1	ECB_01309	721.5104369459278	-0.06570651200070846	0.299667692273326	0.7813147816742058	0.9379284362715866	FALSE	FALSE
ribo	Ara-1	ECB_01310	291.63994175048396	-0.11528382925372957	0.3189459915978155	0.6352498020244706	0.8696733273119935	FALSE	FALSE
ribo	Ara-1	ECB_01311	1282.9821436057168	-0.18637339399585726	0.2864625378175201	0.4232257859331321	0.7568157698136577	FALSE	FALSE
ribo	Ara-1	ECB_01312	73.06032072486254	-0.19476756332738682	0.33257695846172286	0.43487388516362735	0.7646282706241837	FALSE	FALSE
ribo	Ara-1	ECB_01313	82.40964622377983	0.15626896833082474	0.37931967119385696	0.5418228943337391	0.8266443172084339	FALSE	FALSE
ribo	Ara-1	ECB_01314	133.43894665320394	0.017723492363176885	0.3518041478223671	0.945445544414208	0.981818490650734	FALSE	FALSE
ribo	Ara-1	ECB_01315	413.1086494058587	0.0943950573903087	0.35263382173641217	0.7092541270398689	0.903948711522951	FALSE	FALSE
ribo	Ara-1	ECB_01316	12.62680756502679	0.4572748882130497	0.5729858229446901	0.12180614192559604	0.4270773594760076	FALSE	FALSE
ribo	Ara-1	ECB_01317	45.507117498846625	0.8221064564411208	0.45764896235891256	0.014416360416574752	0.11613485196557544	FALSE	FALSE
ribo	Ara-1	ECB_01318	33.36876862766985	-0.587346118324383	0.4575712325129728	0.057624431837828775	0.27907039372190817	FALSE	FALSE
ribo	Ara-1	ECB_01319	64.38813452538376	-0.5145510620348186	0.42606438274328806	0.07611968434125183	0.32558826009713193	FALSE	FALSE
ribo	Ara-1	ECB_01320	85.22119728633636	1.7123622881862446	0.5021726180108275	6.948815890845647e-5	0.0016829693120999334	FALSE	TRUE
ribo	Ara-1	ECB_01321	166.3630470775385	0.954837049744509	0.4027427854115825	0.003399149422452586	0.043545632265312155	FALSE	FALSE
ribo	Ara-1	ECB_01322	12.401322730575425	1.4178673833646331	0.7164563240472848	0.004010336886720682	0.04896226879320045	FALSE	FALSE
ribo	Ara-1	ECB_01323	0.0952580173277935	-0.014337373997168897	0.49478815040893903	0.9268960539205255	NA	FALSE	FALSE
ribo	Ara-1	ECB_01324	0.11978582696991673	-0.015486934392861557	0.49481958137768434	0.9268960539205255	NA	FALSE	FALSE
ribo	Ara-1	ECB_01325	0	NA	NA	NA	NA	FALSE	FALSE
ribo	Ara-1	ECB_01326	3.858112268501	-0.10651432321606345	0.47599475687346554	0.5308421114789865	NA	FALSE	FALSE
ribo	Ara-1	ECB_01327	9.929663601216916	-1.008149698577759	0.9937133685335119	0.027247396038324007	0.1761960531446705	FALSE	FALSE
ribo	Ara-1	ECB_01328	0.4193992813344247	0.05668173922236075	0.49489440808665436	0.5275300471539053	NA	FALSE	FALSE
ribo	Ara-1	ECB_01329	0.11978582696991673	-0.015486934392861557	0.49481958137768434	0.9268960539205255	NA	FALSE	FALSE
ribo	Ara-1	ECB_01330	0	NA	NA	NA	NA	FALSE	FALSE
ribo	Ara-1	ECB_01331	1.3995247148564975	-0.05239095557660069	0.48341699000718974	0.6497360470651685	NA	FALSE	FALSE
ribo	Ara-1	ECB_01332	0.190516034655587	-0.019486400556278077	0.49500792072779093	0.9685250789172494	NA	FALSE	FALSE
ribo	Ara-1	ECB_01333	0.11978582696991673	-0.015486934392861557	0.49481958137768434	0.9268960539205255	NA	FALSE	FALSE
ribo	Ara-1	ECB_01334	0.0952580173277935	-0.014337373997168897	0.49478815040893903	0.9268960539205255	NA	FALSE	FALSE
ribo	Ara-1	ECB_01335	0.46513521090339166	-0.04580303582796623	0.4958010892439775	0.6870528804179734	NA	FALSE	FALSE
ribo	Ara-1	ECB_01336	248.3567846138284	-0.24975806965406488	0.2808474584493233	0.279599872057097	0.6451804948552223	FALSE	FALSE
ribo	Ara-1	ECB_01337	0.8513223700548108	0.009780182452535103	0.4837053015230147	0.9369394262619062	NA	FALSE	FALSE
ribo	Ara-1	ECB_01338	2.320595980398215	-0.08161886424315068	0.4810598246721959	0.5813673208713852	NA	FALSE	FALSE
ribo	Ara-1	ECB_01339	35.31110577701791	0.016227005957813664	0.3330078277682646	0.9485697070315011	0.981858636986394	FALSE	FALSE
ribo	Ara-1	ECB_01340	0.18884486389193664	-0.017860168560670256	0.4949304213320818	0.9268960539205255	NA	FALSE	FALSE
ribo	Ara-1	ECB_01341	2.4563361971754687	0.21682148132474682	0.5205084974848542	0.235973641917437	NA	FALSE	FALSE
ribo	Ara-1	ECB_01342	7.577719394244283	0.01981781255432667	0.4231708682667403	0.9300721679895343	NA	FALSE	FALSE
ribo	Ara-1	ECB_01343	1.080999324084267	0.10011785086094291	0.4973013798073662	0.38053233384595747	NA	FALSE	FALSE
ribo	Ara-1	ECB_01344	7.033565526735088	-0.2889147639461622	0.5355912772485114	0.19683305673931104	NA	FALSE	FALSE
ribo	Ara-1	ECB_01345	14.00680449185543	0.2925291909166403	0.4811267960055145	0.2623707351716941	0.6225560757158556	FALSE	FALSE
ribo	Ara-1	ECB_01346	32.01719961230885	-0.44953271459766614	0.5555891232645386	0.11641976346513508	0.4194553421189839	FALSE	FALSE
ribo	Ara-1	ECB_01347	27.383359063156185	0.4404743161982498	0.42288704209821454	0.127687006385963	0.43873078664796283	FALSE	FALSE
ribo	Ara-1	ECB_01348	4.932084593703086	-0.06308077811903925	0.4465597242911418	0.7519245691047527	NA	FALSE	FALSE
ribo	Ara-1	ECB_01349	464.41685959457124	0.19925100396717235	0.3300742844059395	0.4327008269077881	0.7634211666836358	FALSE	FALSE
ribo	Ara-1	ECB_01350	105.5024545376578	0.2037772560570524	0.31972833406990975	0.4149241297049059	0.7509471338948449	FALSE	FALSE
ribo	Ara-1	ECB_01351	29.449468426025255	0.16612146306535072	0.3687998013721581	0.5158155799725996	0.8104561270258305	FALSE	FALSE
ribo	Ara-1	ECB_01352	308.9826581731129	-0.0859860803876268	0.27104136798497885	0.7037147988820782	0.9024392534953556	FALSE	FALSE
ribo	Ara-1	ECB_01353	64.65801967430434	-0.24214588612008725	0.3307712293600894	0.33382461247015927	0.694753148952078	FALSE	FALSE
ribo	Ara-1	ECB_01354	28.66531876428176	-0.26498852327282085	0.38191498580674244	0.3152576777891486	0.6845135729838729	FALSE	FALSE
ribo	Ara-1	ECB_01355	13.052166481510131	-0.18326686375964177	0.44251571673456125	0.44504445900438716	0.771895548487263	FALSE	FALSE
ribo	Ara-1	ECB_01356	6.211899856151108	0.3984255343242124	0.5670400313631673	0.14028674615939038	NA	FALSE	FALSE
ribo	Ara-1	ECB_01357	10.19563833056831	-0.11644054534946337	0.4211729155885112	0.6176270115920932	0.8595152928998901	FALSE	FALSE
ribo	Ara-1	ECB_01358	7.317975131899744	0.15440931305741817	0.4351954589297526	0.5119462856253031	NA	FALSE	FALSE
ribo	Ara-1	ECB_01361	9.057335986394456	-0.08361535167174124	0.4180018019340793	0.718209388980833	0.9090150828872204	FALSE	FALSE
ribo	Ara-1	ECB_01362	12.839412500485986	-0.14847510449498594	0.4376656874124807	0.522396566487091	0.812223054052737	FALSE	FALSE
ribo	Ara-1	ECB_01363	0	NA	NA	NA	NA	FALSE	FALSE
ribo	Ara-1	ECB_01364	0.47408142033911255	0.09820753775736873	0.5065265931843734	0.28987765937540017	NA	FALSE	FALSE
ribo	Ara-1	ECB_01365	6.2225340640887286	0.28869013715561964	0.5042614221007642	0.23849211366956682	NA	FALSE	FALSE
ribo	Ara-1	ECB_01366	5.5355935940931476	0.08801053385658016	0.4377616296751688	0.6857848661314614	NA	FALSE	FALSE
ribo	Ara-1	ECB_01367	212.25375151606542	-0.08052445661957508	0.2712204937735548	0.7212848726543843	0.9093134302316592	FALSE	FALSE
ribo	Ara-1	ECB_01368	285.62358882908984	0.29448533078794986	0.2732378807063252	0.2034240408603946	0.544964224571147	FALSE	FALSE
ribo	Ara-1	ECB_01369	86.02351885207942	0.6279608692047638	0.3570756444334061	0.02649565777457381	0.17385586896576075	FALSE	FALSE
ribo	Ara-1	ECB_01370	38.720108500472826	0.8119604917746909	0.4569978610016669	0.01551523374593505	0.11972472728208733	FALSE	FALSE
ribo	Ara-1	ECB_01371	9.680735625168895	0.12156879722836006	0.41802278663009074	0.6108839002498603	0.85748274068925745	FALSE	FALSE
ribo	Ara-1	ECB_01374	258.7311907873433	-0.16902793305794064	0.26221529201435	0.4453104419266949	0.771895548487263	FALSE	FALSE
ribo	Ara-1	ECB_01375	11.656716768255261	0.19744765391161576	0.4267096551088583	0.4310247606103827	0.7633904648384839	FALSE	FALSE
ribo	Ara-1	ECB_01376	7.094277640306521	-0.6249590959369561	0.9559134370328399	0.04431777445596186	NA	FALSE	FALSE
ribo	Ara-1	ECB_01377	29.64506457865324	-0.6388294619051793	0.5795011350488435	0.05296938327033585	0.26735385872831335	FALSE	FALSE
ribo	Ara-1	ECB_01378	5.092755351293958	-0.1867358755403193	0.48352725647472355	0.37391676120572204	NA	FALSE	FALSE
ribo	Ara-1	ECB_01379	61.77179959447222	0.3563934516706279	0.35450935802731615	0.18294945284364314	0.5146425118236194	FALSE	FALSE
ribo	Ara-1	ECB_01380	5.188656071783627	-0.03964178637000917	0.44047139364992255	0.8462156722057904	NA	FALSE	FALSE
ribo	Ara-1	ECB_01381	208.14778250259639	0.1630801178684632	0.33138094540703933	0.5185317446893087	0.8104561270258305	FALSE	FALSE
ribo	Ara-1	ECB_01382	3.153878916052719	0.20582131979029825	0.5179554152813042	0.24574382023214925	NA	FALSE	FALSE
ribo	Ara-1	ECB_01383	10.689077358989426	0.07550456602659968	0.4083171711840593	0.7494862420171919	0.9226851433481728	FALSE	FALSE
ribo	Ara-1	ECB_01384	32.708340091790774	0.21654639365983944	0.36100056942578973	0.4058868705756272	0.7482283338148474	FALSE	FALSE
ribo	Ara-1	ECB_01385	8.856817275389535	-1.641235046451462	1.3313847786443265	0.015436406060187402	0.11950478379833067	FALSE	FALSE
ribo	Ara-1	ECB_01386	24.225742932479594	0.010469841466857291	0.37999464095666335	0.9669447138514573	0.9871817148088036	FALSE	FALSE
ribo	Ara-1	ECB_01387	80.37126080730309	0.24433526477444062	0.31634412027486397	0.3290533306094061	0.69107571005465	FALSE	FALSE
ribo	Ara-1	ECB_01388	146.6679376739994	0.14615905895890385	0.274750812619422	0.52618741349186	0.8147153351311076	FALSE	FALSE
ribo	Ara-1	ECB_01390	60.23586228757522	-0.16748932787587545	0.34351962826794175	0.5027546215297358	0.8047856085637201	FALSE	FALSE
ribo	Ara-1	ECB_01391	29.28964425688934	-0.9211814191025334	0.5572700922262255	0.013631840205718636	0.1116841378230722	FALSE	FALSE
ribo	Ara-1	ECB_01392	8.202269020214803	-0.27171463848352423	0.49400461104739246	0.26405459485024757	NA	FALSE	FALSE
ribo	Ara-1	ECB_01393	166.2907253458454	0.47700773754704545	0.379137505951788	0.09255809839901913	0.3672330594694884	FALSE	FALSE
ribo	Ara-1	ECB_01394	141.66542016470208	-0.14196407141568304	0.31515618165473663	0.5583834682672679	0.8346333928591024	FALSE	FALSE
ribo	Ara-1	ECB_01395	8.321144085473627	-0.007698219214428928	0.4130744564238866	0.972081327835476	NA	FALSE	FALSE
ribo	Ara-1	ECB_01396	38.325119655975016	-0.2170244930613476	0.35522414140430203	0.39667438716438064	0.7413381426365683	FALSE	FALSE
ribo	Ara-1	ECB_01397	7.729999128342043	-0.3720552784667673	0.5588589631811639	0.1599263397174968	NA	FALSE	FALSE
ribo	Ara-1	ECB_01398	3.4593409213880357	-0.014290241864432722	0.45348268806529185	0.9369927536642194	NA	FALSE	FALSE
ribo	Ara-1	ECB_01399	3.3034741431027572	0.35589006589279454	0.6144141420017002	0.10185821684475214	NA	FALSE	FALSE
ribo	Ara-1	ECB_01400	1.2914029222659154	-0.06345235621083739	0.4840611707533437	0.6258463142153423	NA	FALSE	FALSE
ribo	Ara-1	ECB_01401	38.79681035583122	-0.7101867378348896	0.48994985065192437	0.030227187266269332	0.18604708856656269	FALSE	FALSE
ribo	Ara-1	ECB_01402	13.613085322429123	2.0414309007557274	0.7833828130133226	6.807815597111248e-4	0.011859931382335912	FALSE	FALSE
ribo	Ara-1	ECB_01403	165.4930063055019	0.556096943403252	0.37813048059165383	0.05377204154111283	0.26831978517751276	FALSE	FALSE
ribo	Ara-1	ECB_01404	37.165221015799574	-0.2883521286329819	0.36837526973372514	0.2719611458897522	0.6364275362180453	FALSE	FALSE
ribo	Ara-1	ECB_01405	274.6655922196725	-0.30381624662553736	0.2783270626712071	0.18695045241090016	0.520977921171255	FALSE	FALSE
ribo	Ara-1	ECB_01406	71.09268934205147	0.28794549295486677	0.34639126485550964	0.2711516397188717	0.6355316559579219	FALSE	FALSE
ribo	Ara-1	ECB_01407	9.414316106409203	0.07459261354971937	0.40963187233280635	0.7530577935215224	0.9262424305948039	FALSE	FALSE
ribo	Ara-1	ECB_01408	237.83676934527537	0.8316906368586402	0.48407216397438513	0.017464145515413875	0.13006422372604484	FALSE	FALSE
ribo	Ara-1	ECB_01409	2725.093674104072	-0.09565561544774619	0.4115530579764973	0.6784342622449797	0.8842737679678444	FALSE	FALSE
ribo	Ara-1	ECB_01410	31.160379140086732	2.0295366679744204	0.4686655186606094	1.3646668692287893e-6	4.8396935755149564e-5	FALSE	TRUE
ribo	Ara-1	ECB_01411	5.509996955032994	-0.21191682733506875	0.49353864329029573	0.3209251209216241	NA	FALSE	FALSE
ribo	Ara-1	ECB_01412	0.47408142033911255	0.09820753775736873	0.5065265931843734	0.28987765937540017	NA	FALSE	FALSE
ribo	Ara-1	ECB_01413	5.053321411965254	0.2661655406262422	0.5169942080239288	0.23464422885951236	NA	FALSE	FALSE
ribo	Ara-1	ECB_01414	21.54639070274824	-0.7892320860127234	0.7172659914125935	0.03282639341839291	0.1971569072447429	FALSE	FALSE
ribo	Ara-1	ECB_01415	8.683340592938519	0.572461529392293	0.6808430557784452	0.07452957183152574	0.3222403403281788	FALSE	FALSE
ribo	Ara-1	ECB_01416	0.8576444334205637	-0.015032454150304247	0.48548452202492576	0.9022388847753109	NA	FALSE	FALSE
ribo	Ara-1	ECB_01417	0.12329239785853273	-0.01563414401276606	0.49482465459085223	0.9268960539205255	NA	FALSE	FALSE
ribo	Ara-1	ECB_01418	0.7403895502209242	-0.07004163868694288	0.4985490756746488	0.46545591027714167	NA	FALSE	FALSE
ribo	Ara-1	ECB_01419	9.304382785352269	0.044429061462482676	0.4059953163856805	0.8506971594699356	0.9550019059078281	FALSE	FALSE
ribo	Ara-1	ECB_01420	3.046954781830843	-0.06568096431966836	0.4650461642956005	0.7051007739831502	NA	FALSE	FALSE
ribo	Ara-1	ECB_01421	18.030953185663247	-0.5218599637074212	0.5318745581505936	0.09270200091341231	0.3672330594694884	FALSE	FALSE
ribo	Ara-1	ECB_01423	7.653079925234782	0.42958477562819264	0.5665447180421096	0.12688145153102076	NA	FALSE	FALSE
ribo	Ara-1	ECB_01424	2.706438210267191	-0.009950694857441296	0.46166319321171806	0.951711652154684	NA	FALSE	FALSE
ribo	Ara-1	ECB_01425	8.116185087244698	0.11296828301350703	0.436281790188656	0.6190229272765447	NA	FALSE	FALSE
ribo	Ara-1	ECB_01426	24.170021145839037	0.133125613457989	0.3661378364525212	0.6004833295166752	0.853953149257359	FALSE	FALSE
ribo	Ara-1	ECB_01427	1.5845300839033554	0.026447624532343384	0.4759888794335912	0.843973777453523	NA	FALSE	FALSE
ribo	Ara-1	ECB_01428	0	NA	NA	NA	NA	FALSE	FALSE
ribo	Ara-1	ECB_01429	0	NA	NA	NA	NA	FALSE	FALSE
ribo	Ara-1	ECB_01430	0	NA	NA	NA	NA	FALSE	FALSE
ribo	Ara-1	ECB_01431	32.566468361678815	0.35019164908822387	0.40611880069064676	0.20763441339299446	0.5508346731331908	FALSE	FALSE
ribo	Ara-1	ECB_01432	10.0204115437035	1.1793866521556315	0.8814098275041427	0.013775742591989222	0.11212551142496144	FALSE	FALSE
ribo	Ara-1	ECB_01433	6.436167414671035	0.3113087422448429	0.5210034159063419	0.21450521440949608	NA	FALSE	FALSE
ribo	Ara-1	ECB_01434	4.772418432055375	-0.0697559944904612	0.44546978532781617	0.7322318401945325	NA	FALSE	FALSE
ribo	Ara-1	ECB_01435	44.28177569007815	-0.3582988443002616	0.3722141198559685	0.1811447746170436	0.5110135261213757	FALSE	FALSE
ribo	Ara-1	ECB_01436	36.7729470786211	-0.0014594448158177418	0.32775636201679537	0.9941719357559389	0.9968682989830375	FALSE	FALSE
ribo	Ara-1	ECB_01437	622.7119117087759	0.22698333411881827	0.2541425448756782	0.30222404575993794	0.6657660271683956	FALSE	FALSE
ribo	Ara-1	ECB_01438	38.153081212740396	0.12573035480769362	0.36444617864994067	0.619152082840646	0.8607552588714724	FALSE	FALSE
ribo	Ara-1	ECB_01439	0	NA	NA	NA	NA	FALSE	FALSE
ribo	Ara-1	ECB_01440	70.24750861865573	0.1156380225175553	0.3371315662635211	0.6450325638324665	0.8753506920529235	FALSE	FALSE
ribo	Ara-1	ECB_01441	3.5496080782368993	-0.11865734097180246	0.472009838368041	0.5231006734543668	NA	FALSE	FALSE
ribo	Ara-1	ECB_01442	2.897929872041117	0.05132467998160539	0.46001495057437775	0.7731394497308549	NA	FALSE	FALSE
ribo	Ara-1	ECB_01443	4.733508763090303	0.11751450610284674	0.4534316126221704	0.5723097193478759	NA	FALSE	FALSE
ribo	Ara-1	ECB_01444	2.8624158812585656	-0.045383152670281146	0.4622211116290558	0.7925062559750008	NA	FALSE	FALSE
ribo	Ara-1	ECB_01445	14.92519636852683	0.31127121005288777	0.44319396718998844	0.253956654113272	0.6126716194994707	FALSE	FALSE
ribo	Ara-1	ECB_01446	2.3206998291839467	-0.002637502919763116	0.4659169743873748	0.9861352298836181	NA	FALSE	FALSE
ribo	Ara-1	ECB_01447	25.370997925169576	0.2091216640243222	0.3827398786618723	0.423001688063568	0.7568157698136577	FALSE	FALSE
ribo	Ara-1	ECB_01448	12.197716356061425	-0.37068664084090003	0.5141065950414595	0.17681378452549176	0.5094083792083558	FALSE	FALSE
ribo	Ara-1	ECB_01449	25.33128264775292	0.6183264592009461	0.4509719824238969	0.04855941360135839	0.25648668992632384	FALSE	FALSE
ribo	Ara-1	ECB_01450	13.037450203630188	-0.14844404343186687	0.4143386683086826	0.5424940047473945	0.8266443172084339	FALSE	FALSE
ribo	Ara-1	ECB_01451	15.098273426200244	-0.3729496952915084	0.5853954413451344	0.12451854179647694	0.4323318601535021	FALSE	FALSE
ribo	Ara-1	ECB_01452	203.04096561036366	-1.0000767480547903	0.75210410242238	0.01227998715666482	0.10603501953537535	FALSE	FALSE
ribo	Ara-1	ECB_01453	189.29079078092215	-0.7920375506285494	0.6966663515228971	0.025962808883680924	0.17073555775824606	FALSE	FALSE
ribo	Ara-1	ECB_01454	40.11348585878722	-0.6574622744258083	0.7803556655554542	0.04214166448145995	0.2337802951401661	FALSE	FALSE
ribo	Ara-1	ECB_01455	2.7223598327165814	0.09647237787737034	0.47726507141502406	0.5593607375965812	NA	FALSE	FALSE
ribo	Ara-1	ECB_01456	15.78985970276904	0.9599140327100955	0.6558297279964506	0.01798421196862671	0.13213877301257762	FALSE	FALSE
ribo	Ara-1	ECB_01457	0.21504384429771023	-0.02362215961883249	0.494877164541081	0.9465740347683287	NA	FALSE	FALSE
ribo	Ara-1	ECB_01458	0	NA	NA	NA	NA	FALSE	FALSE
ribo	Ara-1	ECB_01459	12.486861683628597	-0.22617156957899795	0.4435689800391704	0.3654637719252439	0.7144737181679591	FALSE	FALSE
ribo	Ara-1	ECB_01460	0.12329239785853273	-0.01563414401276606	0.49482465459085223	0.9268960539205255	NA	FALSE	FALSE
ribo	Ara-1	ECB_01461	0.12329239785853273	-0.01563414401276606	0.49482465459085223	0.9268960539205255	NA	FALSE	FALSE
ribo	Ara-1	ECB_01462	0.11978582696991673	-0.015486934392861557	0.49481958137768434	0.9268960539205255	NA	FALSE	FALSE
ribo	Ara-1	ECB_01463	0.5306876769367956	-0.058785478591527274	0.49639154915598505	0.6092587734703858	NA	FALSE	FALSE
ribo	Ara-1	ECB_01464	0.9220525777404811	-0.0010103364687575433	0.48389205757821036	0.9794731143951512	NA	FALSE	FALSE
ribo	Ara-1	ECB_01465	0.11978582696991673	-0.015486934392861557	0.49481958137768434	0.9268960539205255	NA	FALSE	FALSE
ribo	Ara-1	ECB_01466	0.11978582696991673	-0.015486934392861557	0.49481958137768434	0.9268960539205255	NA	FALSE	FALSE
ribo	Ara-1	ECB_01467	0.11978582696991673	-0.015486934392861557	0.49481958137768434	0.9268960539205255	NA	FALSE	FALSE
ribo	Ara-1	ECB_01468	4.866527166264066	0.059518441285662756	0.45346682770801533	0.7525637136682322	NA	FALSE	FALSE
ribo	Ara-1	ECB_01469	41.53631937743081	-0.1364641293128592	0.35418398676894197	0.5846695341634232	0.848689622321252	FALSE	FALSE
ribo	Ara-1	ECB_01470	4.836891918356492	-0.2133445852395309	0.5167652054180463	0.25981246358513443	NA	FALSE	FALSE
ribo	Ara-1	ECB_01472	1.6482471498117937	0.016738480461398454	0.4775907336640717	0.8962391437728227	NA	FALSE	FALSE
ribo	Ara-1	ECB_01473	2.085214435666329	-0.23505354550832364	0.5597520039416217	0.07022939274023747	NA	FALSE	FALSE
ribo	Ara-1	ECB_01474	12.70746942334543	0.2413677321956742	0.43048461093289514	0.3521437980142799	0.7124027452997602	FALSE	FALSE
ribo	Ara-1	ECB_01475	0.6034113328565385	0.015394501701106799	0.48733858211822567	0.8405154921914997	NA	FALSE	FALSE
ribo	Ara-1	ECB_01476	24.465686402011947	-0.2688331773092147	0.4060286499184793	0.3098898460207716	0.6767452277929177	FALSE	FALSE
ribo	Ara-1	ECB_01477	63.49748775183388	-0.4289059689065487	0.413409592391106	0.12631920788426226	0.43559126441106016	FALSE	FALSE
ribo	Ara-1	ECB_01478	11.712172025715466	0.17794815000261732	0.41558844112624993	0.47554047081124723	0.789122952137779	FALSE	FALSE
ribo	Ara-1	ECB_01479	14.339989477472884	0.2699057376957635	0.43702098451376925	0.30944753260430213	0.6763347025885664	FALSE	FALSE
ribo	Ara-1	ECB_01480	17.698654918224086	0.5027991279348409	0.4800412653395335	0.09996868872324324	0.3857600048012197	FALSE	FALSE
ribo	Ara-1	ECB_01481	76.25499605681374	0.08741987160591902	0.31841177971277407	0.7225918248465928	0.909883176516087	FALSE	FALSE
ribo	Ara-1	ECB_01482	204.65273512788497	-0.10852789736063342	0.2975122598779022	0.6463758887079591	0.8756497373628969	FALSE	FALSE
ribo	Ara-1	ECB_01483	13.335785434584658	-0.0863024177687957	0.39406108692395786	0.7229585360233561	0.909883176516087	FALSE	FALSE
ribo	Ara-1	ECB_01484	0.4520845544672665	0.0339084753981919	0.48989885821821383	0.6873265016962051	NA	FALSE	FALSE
ribo	Ara-1	ECB_01485	102.0679807964095	-0.7887826301591915	0.47701218216410407	0.01640779799741906	0.12405794475713547	FALSE	FALSE
ribo	Ara-1	ECB_01486	49.774802552665726	-0.09319674316796375	0.32745811171980066	0.7036905402154352	0.9024392534953556	FALSE	FALSE
ribo	Ara-1	ECB_01487	30.448655305543262	-0.059119982936821525	0.36444142021866277	0.809165141373816	0.9466025468786383	FALSE	FALSE
ribo	Ara-1	ECB_01488	12.74106148589456	-0.05341599924781675	0.4074099734399991	0.8178298972337119	0.9466025468786383	FALSE	FALSE
ribo	Ara-1	ECB_01489	4.950819075576921	-0.5316421092929481	0.8689131283307328	0.05240739854712172	NA	FALSE	FALSE
ribo	Ara-1	ECB_01490	31.799236054234825	-0.9775099162934766	0.5718061187795294	0.0107939648286345	0.09627414851973533	FALSE	FALSE
ribo	Ara-1	ECB_01491	6.221206940341537	-1.7069187757760815	1.736761925344606	0.025338734866399676	NA	FALSE	FALSE
ribo	Ara-1	ECB_01492	146.63152774471456	0.1370390029201608	0.2882202261868383	0.5622112585596828	0.8358163766735028	FALSE	FALSE
ribo	Ara-1	ECB_01493	134.16723807541797	-0.29126353336208693	0.3273030949050864	0.24445403684769115	0.6034197726844281	FALSE	FALSE
ribo	Ara-1	ECB_01494	16.40765858002895	0.6647407152385254	0.5806661312494233	0.053039990100178985	0.26735385872831335	FALSE	FALSE
ribo	Ara-1	ECB_01495	2.1245195460443562	-0.07095705709929981	0.4756429719810155	0.6482473536257369	NA	FALSE	FALSE
ribo	Ara-1	ECB_01496	1.861964752628297	-0.02817567341922415	0.47311931568830967	0.8446733811923297	NA	FALSE	FALSE
ribo	Ara-1	ECB_01497	382.9578637839794	0.013201314894897297	0.26110649929143853	0.954015073622375	0.9831052888386144	FALSE	FALSE
ribo	Ara-1	ECB_01498	736.7075449651254	0.20973236607654466	0.26147932060190154	0.3497886134689023	0.7103069390074027	FALSE	FALSE
ribo	Ara-1	ECB_01499	152.34658095776672	-0.13305392225816134	0.2933931304765452	0.5725235445405661	0.8414147208615423	FALSE	FALSE
ribo	Ara-1	ECB_01500	28.861119862810444	0.24979966151368932	0.43601248553082506	0.34203097141203226	0.7025422096424361	FALSE	FALSE
ribo	Ara-1	ECB_01501	19.233429444845978	-0.7739388755528234	0.6521335085072119	0.035839270853967715	0.20893383145590966	FALSE	FALSE
ribo	Ara-1	ECB_01502	1.7318234423538474	-0.004896165355727767	0.47222857047642597	0.9721973842481431	NA	FALSE	FALSE
ribo	Ara-1	ECB_01503	9.523687363309586	0.03847606878063919	0.49297400563854155	0.6060333432220815	0.8548734829175411	FALSE	FALSE
ribo	Ara-1	ECB_01504	13.954202721140037	0.3293264074052578	0.4786526282217298	0.22851717262439242	0.5838681160795489	FALSE	FALSE
ribo	Ara-1	ECB_01505	4.698071980621585	-0.25387582297053746	0.5425072153058291	0.18319620896179617	NA	FALSE	FALSE
ribo	Ara-1	ECB_01506	2.2990322847028875	0.19793448358504118	0.5193020013256271	0.23680461113641932	NA	FALSE	FALSE
ribo	Ara-1	ECB_01507	2.184197452567429	-0.031667236870115086	0.4968368916820089	0.417331844787763	NA	FALSE	FALSE
ribo	Ara-1	ECB_01508	3.255605535701176	0.18885182710581966	0.4965445113002258	0.3281321023205789	NA	FALSE	FALSE
ribo	Ara-1	ECB_01509	10.0132691129174	0.005397183914968843	0.4035638298402637	0.9826239940202147	0.9917733896612967	FALSE	FALSE
ribo	Ara-1	ECB_01510	1.296565056026525	0.24274914145826307	0.5786292241789658	0.03448401442281622	NA	FALSE	FALSE
ribo	Ara-1	ECB_01526	9.63243632205231	-0.5839457473274201	0.7422155642067366	0.06777281391981105	0.3042313581097865	FALSE	FALSE
ribo	Ara-1	ECB_01527	31.48922269520773	-0.27722234565892034	0.3796984645929601	0.29352809364796495	0.659907138545816	FALSE	FALSE
ribo	Ara-1	ECB_01528	5.513531882411885	0.18430623247595462	0.4684943856038744	0.4041847780047646	NA	FALSE	FALSE
ribo	Ara-1	ECB_01529	0.35935748090975017	-0.029933273176603315	0.49532088690383214	0.8206106697943301	NA	FALSE	FALSE
ribo	Ara-1	ECB_01530	0.5391851083043415	0.044546384816247724	0.49076585638112086	0.6349951442489503	NA	FALSE	FALSE
ribo	Ara-1	ECB_01531	0.46162864001477566	-0.054238394138085844	0.4959474846710362	0.6545716403392936	NA	FALSE	FALSE
ribo	Ara-1	ECB_01532	39.76626187689961	-0.06676887311899257	0.35215056008384377	0.7865390534718285	0.9392306712216085	FALSE	FALSE
ribo	Ara-1	ECB_01533	4.689465793428852	-0.13705719656094567	0.4695623242829815	0.49029973176070496	NA	FALSE	FALSE
ribo	Ara-1	ECB_01534	139.86994803344513	0.2838324341895699	0.3031522300573845	0.24878620168405707	0.6069894306443948	FALSE	FALSE
ribo	Ara-1	ECB_01535	9.442582175565539	-0.10370409378328149	0.435208841503526	0.641403440894277	0.8750548417302653	FALSE	FALSE
ribo	Ara-1	ECB_01536	5.440477630888603	-0.49283532083893444	0.7350692321168595	0.08003046561526703	NA	FALSE	FALSE
ribo	Ara-1	ECB_01537	1.3015715243971118	0.034226184754989876	0.48005423935760067	0.7861476810102613	NA	FALSE	FALSE
ribo	Ara-1	ECB_01538	0.7035021625541549	0.025474932516551085	0.48757953403329124	0.7899149409249556	NA	FALSE	FALSE
ribo	Ara-1	ECB_01539	26.077040845572917	-0.05258612219870529	0.34746904892288877	0.8311588483981345	0.9484268248875608	FALSE	FALSE
ribo	Ara-1	ECB_01540	0.6654572280013263	0.011140176378151173	0.48699062418882205	0.8775492562745598	NA	FALSE	FALSE
ribo	Ara-1	ECB_01541	12.907861971333205	0.13103444624006677	0.41057521662343505	0.5907296509517339	0.8503234323837989	FALSE	FALSE
ribo	Ara-1	ECB_01542	45.57140126444176	-0.17864199788091778	0.33819366694002323	0.4752736846313336	0.789122952137779	FALSE	FALSE
ribo	Ara-1	ECB_01543	0	NA	NA	NA	NA	FALSE	FALSE
ribo	Ara-1	ECB_01544	0	NA	NA	NA	NA	FALSE	FALSE
ribo	Ara-1	ECB_01545	8.793400752173815	-0.059503337453747585	0.4133915886583768	0.7968153786383736	0.9419496083189345	FALSE	FALSE
ribo	Ara-1	ECB_01546	0.5391851083043415	0.044546384816247724	0.49076585638112086	0.6349951442489503	NA	FALSE	FALSE
ribo	Ara-1	ECB_01549	11.01760504001679	-0.2295450823266768	0.44454232332587323	0.36310544532515515	0.7133458245641475	FALSE	FALSE
ribo	Ara-1	ECB_01550	4.188994908944953	0.1907431312253157	0.4945473752685237	0.3307629542312945	NA	FALSE	FALSE
ribo	Ara-1	ECB_01551	37.48249002081922	0.10458135309369264	0.3287450024594861	0.674673970779166	0.8842737679678444	FALSE	FALSE
ribo	Ara-1	ECB_01552	95.47404961557054	-1.9786573558679992	0.48534117525109916	2.9563206312248465e-6	1.0007817227748656e-4	FALSE	TRUE
ribo	Ara-1	ECB_01553	60.06586984354071	-1.7480154941009365	0.4765498869065723	1.8844575174028768e-5	5.035845484775489e-4	FALSE	TRUE
ribo	Ara-1	ECB_01554	27.385318787802337	-0.2782785597648446	0.39589388927600516	0.2929669183183444	0.6596738092746395	FALSE	FALSE
ribo	Ara-1	ECB_01555	49.25559549897277	-0.08491644042592474	0.34366282560845474	0.731064141713388	0.9127821136198506	FALSE	FALSE
ribo	Ara-1	ECB_01556	7.197054851661412	-0.15565703125231858	0.4693146968112471	0.44993361563193596	NA	FALSE	FALSE
ribo	Ara-1	ECB_01557	23.67576939155611	0.8837699163404675	0.7034687739055868	0.02795560310819345	0.17858236209609932	FALSE	FALSE
ribo	Ara-1	ECB_01558	5.012641739222578	0.4396353920249906	0.6424829925718064	0.10359314641178886	NA	FALSE	FALSE
ribo	Ara-1	ECB_01559	19.079218404388943	0.3872062834993048	0.43858610878751625	0.17379089125231958	0.5065783415270646	FALSE	FALSE
ribo	Ara-1	ECB_01560	125.44587222292645	0.3871521797699739	0.31953996102360444	0.13113348016893966	0.4447358861002813	FALSE	FALSE
ribo	Ara-1	ECB_01561	10.544097201923059	0.09068930777535765	0.419388114899235	0.6998991453680851	0.8998703297589665	FALSE	FALSE
ribo	Ara-1	ECB_01562	25.82786164005919	-0.08256752422611595	0.40757999710365067	0.7245218105647154	0.9106074984247476	FALSE	FALSE
ribo	Ara-1	ECB_01563	107.55594878053869	0.5204734842545509	0.3295863185903083	0.0495217388408112	0.2585537957914782	FALSE	FALSE
ribo	Ara-1	ECB_01564	14.513861209390086	0.025080572319407624	0.3862024649074971	0.9186779769304111	0.9742761457015646	FALSE	FALSE
ribo	Ara-1	ECB_01565	442.0499254779775	-0.25029624957718183	0.3847288480892655	0.3328667115840571	0.694753148952078	FALSE	FALSE
ribo	Ara-1	ECB_01566	143.2062794249005	-3.0534377950151748	0.5002840221611466	6.638942773742365e-11	4.036206229179287e-9	FALSE	TRUE
ribo	Ara-1	ECB_01567	43.74105464871607	-0.5895064606330918	0.48507851309028854	0.05691221210430185	0.277481963762218	FALSE	FALSE
ribo	Ara-1	ECB_01568	9.778100100719938	0.2575215963392107	0.4929318672312721	0.2833826929575131	0.6478872159020963	FALSE	FALSE
ribo	Ara-1	ECB_01569	4.116630093778763	0.3178380158721377	0.5673220366562951	0.16118619139119028	NA	FALSE	FALSE
ribo	Ara-1	ECB_01570	15.276210338524917	-0.11168836818903877	0.3916396727582415	0.6489927497451744	0.8773593484120318	FALSE	FALSE
ribo	Ara-1	ECB_01571	2937.669674258709	0.42298531973074827	0.40269284079692913	0.14214327874214278	0.46103845511864927	FALSE	FALSE
ribo	Ara-1	ECB_01572	1730.9549144228506	0.8625022807661491	0.46978350426358234	0.013265064024873614	0.11069082837562605	FALSE	FALSE
ribo	Ara-1	ECB_01573	537.7685206845507	0.25843461477911	0.2791780216951844	0.27034098762233305	0.6346302617233492	FALSE	FALSE
ribo	Ara-1	ECB_01574	27.063094332506456	0.6776795324319322	0.5458094645153682	0.04889888976547036	0.2578113397842444	FALSE	FALSE
ribo	Ara-1	ECB_01575	46.746014230920494	0.10331649819678757	0.31536057788291305	0.674284773034667	0.8842737679678444	FALSE	FALSE
ribo	Ara-1	ECB_01576	20.122034132638227	0.11315859780094671	0.37398416233176035	0.6521873100594052	0.8783300165763871	FALSE	FALSE
ribo	Ara-1	ECB_01577	415.1970303908195	-0.34519842349464275	0.36190620296107284	0.18785290539038302	0.5225152242371157	FALSE	FALSE
ribo	Ara-1	ECB_01578	410.67035940137646	-0.19365439956542096	0.2810971561157445	0.40120778257252937	0.7432823285345553	FALSE	FALSE
ribo	Ara-1	ECB_01579	26.17933827865347	-0.01888541519334848	0.3504182021430999	0.9382786985946417	0.9776608055660853	FALSE	FALSE
ribo	Ara-1	ECB_01580	189.40404511375513	0.1485108977475832	0.30074288302793517	0.5395990608513015	0.8247642905469611	FALSE	FALSE
ribo	Ara-1	ECB_01581	243.72314871492532	0.5739735499254904	0.42388383174344646	0.06069048163452958	0.28588321778298975	FALSE	FALSE
ribo	Ara-1	ECB_01582	352.50382902408273	0.38558225853553824	0.31133051000159	0.12746385871928606	0.43846978651819074	FALSE	FALSE
ribo	Ara-1	ECB_01583	558.6284950601504	0.18168560202356762	0.28409391889168983	0.44138482938264456	0.7702839391088931	FALSE	FALSE
ribo	Ara-1	ECB_01584	3.7556675077613715	0.32212315252728335	0.5670869104541417	0.15382174049861688	NA	FALSE	FALSE
ribo	Ara-1	ECB_01585	1.5350079961445289	-0.07168338985118038	0.4853013047689231	0.5572852279106771	NA	FALSE	FALSE
ribo	Ara-1	ECB_01586	3.891041978858055	0.28954137624738097	0.5571086905790493	0.16465909545684723	NA	FALSE	FALSE
ribo	Ara-1	ECB_01587	114.0296061516689	0.1430813077292588	0.29874050748923	0.5533667221809748	0.8321451112453933	FALSE	FALSE
ribo	Ara-1	ECB_01588	32.22299227242287	-0.3407587888502759	0.41932791758548177	0.21167848845251086	0.5555860943612598	FALSE	FALSE
ribo	Ara-1	ECB_01589	19.422427801133434	0.33706720234753257	0.41490423952247907	0.22187320643602185	0.5727558769262644	FALSE	FALSE
ribo	Ara-1	ECB_01590	45.71121677441378	0.9619591052598097	0.4808591964122861	0.007570317787400555	0.0761891104346833	FALSE	FALSE
ribo	Ara-1	ECB_01591	54.62898946008293	0.34558169580412523	0.38548994186342544	0.20749854894193173	0.5508346731331908	FALSE	FALSE
ribo	Ara-1	ECB_01592	226.43201857907698	-0.2832950870674277	0.3919019260877576	0.280368202567569	0.6456335927070651	FALSE	FALSE
ribo	Ara-1	ECB_01593	417.8970383068574	0.19588385705407546	0.25520181597128827	0.3733453720318512	0.7184727798985043	FALSE	FALSE
ribo	Ara-1	ECB_01594	22.201014865228395	0.016650703041863557	0.3599728073440225	0.9474352873196736	0.981858636986394	FALSE	FALSE
ribo	Ara-1	ECB_01595	18.69907831304663	0.048650257251245214	0.39561507083262976	0.8408684014016412	0.9517275713432709	FALSE	FALSE
ribo	Ara-1	ECB_01596	30.803824126482176	0.5684433582854502	0.5306197235686898	0.07773637319332509	0.33040228292492163	FALSE	FALSE
ribo	Ara-1	ECB_01597	38.384078964498904	0.26503568925107995	0.4094359368948952	0.32242994401191616	0.6873056101908489	FALSE	FALSE
ribo	Ara-1	ECB_01598	40.79582334268094	0.4127828566868624	0.4276798286961277	0.15294048127720342	0.4765791775363902	FALSE	FALSE
ribo	Ara-1	ECB_01599	133.49676373710983	0.46001044360592264	0.4257712804086778	0.11917220880806796	0.4270773594760076	FALSE	FALSE
ribo	Ara-1	ECB_01600	68.7452242609835	0.18892488965415435	0.36802440044332446	0.4649822899881472	0.7848058027618643	FALSE	FALSE
ribo	Ara-1	ECB_01601	30.955215418952825	0.2215480991157231	0.3912512106140659	0.3974902852406488	0.7416869302857236	FALSE	FALSE
ribo	Ara-1	ECB_01602	51.95502217609144	-0.12284275720717511	0.3939344441375793	0.6141515031177671	0.8587663663367787	FALSE	FALSE
ribo	Ara-1	ECB_01603	64.80116594901139	0.08681764656481725	0.39847531675172204	0.7224598982396422	0.909883176516087	FALSE	FALSE
ribo	Ara-1	ECB_01604	27.997183925699222	0.30742480164535874	0.41952241273229474	0.26395856522903344	0.6250656326051595	FALSE	FALSE
ribo	Ara-1	ECB_01605	373.2581050727145	-0.019377989780171762	0.3220257846802715	0.9348007812763217	0.9772168026934688	FALSE	FALSE
ribo	Ara-1	ECB_01606	116.03266942292218	0.5953593482905526	0.32252442466747894	0.024674850013033503	0.16444379908014947	FALSE	FALSE
ribo	Ara-1	ECB_01607	1057.1403518584646	0.06584759334106668	0.2990009877583875	0.785844874920018	0.9392306712216085	FALSE	FALSE
ribo	Ara-1	ECB_01608	131.6596616146066	0.2449593061155244	0.3165402912154228	0.3286518317174711	0.69107571005465	FALSE	FALSE
ribo	Ara-1	ECB_01609	6.138917905902203	-0.19643562170595594	0.4722352058430403	0.382457773625633	NA	FALSE	FALSE
ribo	Ara-1	ECB_01610	95.75077509013842	0.38784085548933783	0.3275719557547521	0.13466477184163858	0.45024282302608454	FALSE	FALSE
ribo	Ara-1	ECB_01611	2653.0212835623674	0.002845101504468855	0.26951397406207794	0.991822642287206	0.9961698082850933	FALSE	FALSE
ribo	Ara-1	ECB_01612	184.60518644817134	0.16634522729688261	0.3053841424603111	0.4951849752383986	0.7988813946440666	FALSE	FALSE
ribo	Ara-1	ECB_01613	13.880614718247513	0.2406234009405114	0.4261218901022174	0.3529283891366418	0.7124027452997602	FALSE	FALSE
ribo	Ara-1	ECB_01614	26.831734962175773	-0.03215896385456201	0.35742867927659994	0.8956814211959249	0.9668878332694049	FALSE	FALSE
ribo	Ara-1	ECB_01615	29.966011359581074	0.12317664103781001	0.3432732147795016	0.62519352313008425	0.8644855636950306	FALSE	FALSE
ribo	Ara-1	ECB_01616	18.82216318963521	-0.0951193720978136	0.402343340171646	0.6906950451791141	0.8918857995615868	FALSE	FALSE
ribo	Ara-1	ECB_01617	201.0777275352403	0.3496798837662718	0.31469657605519996	0.16741465264467412	0.49674128508813165	FALSE	FALSE
ribo	Ara-1	ECB_01618	4.737897758797567	-0.052197545318789854	0.4454106714497218	0.7931084940243409	NA	FALSE	FALSE
ribo	Ara-1	ECB_01619	8.179650406572556	-0.08931758784211817	0.42974250903863354	0.6909420605585901	NA	FALSE	FALSE
ribo	Ara-1	ECB_01620	271.0619215102506	0.4046548886122867	0.30420042875637177	0.10543370140247835	0.39757847655440887	FALSE	FALSE
ribo	Ara-1	ECB_01621	230.81836241768653	0.31282121732435736	0.2754272773952139	0.17910564672519746	0.5107992069950409	FALSE	FALSE
ribo	Ara-1	ECB_01622	116.21944905979716	0.2436488998642723	0.38036291836908936	0.3598346464687046	0.7124027452997602	FALSE	FALSE
ribo	Ara-1	ECB_01623	82.39539457485105	-0.31053006845186243	0.36943564934973394	0.23580594093407356	0.5939013728943665	FALSE	FALSE
ribo	Ara-1	ECB_01624	1240.2695620218615	0.6055991925566753	0.37640076536451783	0.03784785434180105	0.21640836484496226	FALSE	FALSE
ribo	Ara-1	ECB_01625	62.865349209168436	0.03138376599775504	0.3094208649705829	0.8975979236244453	0.9679239107327312	FALSE	FALSE
ribo	Ara-1	ECB_01626	831.435614998402	0.08685039175275577	0.47443948417808784	NA	NA	FALSE	FALSE
ribo	Ara-1	ECB_01627	109.78300691578215	0.39068043142706455	0.34010607337429305	0.1400646390452637	0.4603095758237241	FALSE	FALSE
ribo	Ara-1	ECB_01628	184.9652204843605	0.062891646929979	0.3179498285054582	0.7991544021040127	0.9435535383038736	FALSE	FALSE
ribo	Ara-1	ECB_01629	299.03784908387775	0.270076315138519	0.41809436254449867	0.31707597634090756	0.6858575829931816	FALSE	FALSE
ribo	Ara-1	ECB_01630	33.166395600434406	-0.18162380043616	0.3521008926851174	0.47462277198494546	0.789122952137779	FALSE	FALSE
ribo	Ara-1	ECB_01631	101.4000600233176	-1.3559513703324388	0.8435937032459153	0.004601760130600005	0.0539229559027607	FALSE	FALSE
ribo	Ara-1	ECB_01632	1095.3723534614887	-0.07485642979531039	0.3002668107316338	0.7516601526856639	0.924905243639237	FALSE	FALSE
ribo	Ara-1	ECB_01633	406.4218278337207	0.011809991401174069	0.26284772018154184	0.9606929783118737	0.9848260090815801	FALSE	FALSE
ribo	Ara-1	ECB_01634	75.78284718355548	-0.37345086411325723	0.35631031239253547	0.15697366901579415	0.4801073511273622	FALSE	FALSE
ribo	Ara-1	ECB_01635	202.1208379708774	0.08126610836075623	0.30412059390549195	0.7382736411889057	0.9178285612540898	FALSE	FALSE
ribo	Ara-1	ECB_01636	498.0343137723802	-0.1418283843408805	0.2989560506269161	0.5502743010232496	0.830338127415069	FALSE	FALSE
ribo	Ara-1	ECB_01637	15.671875517567837	-0.05691535745033326	0.379587206825448	0.8158321787921249	0.9466025468786383	FALSE	FALSE
ribo	Ara-1	ECB_01638	4.002492025135209	-0.0796587990050064	0.4567461553029729	0.6786257968159477	NA	FALSE	FALSE
ribo	Ara-1	ECB_01639	3.9481609966651727	-0.23389028226484737	0.5263001593079655	0.23064140605158112	NA	FALSE	FALSE
ribo	Ara-1	ECB_01640	4.653015263131464	-0.04831615190965006	0.45173624198638723	0.7992957999816572	NA	FALSE	FALSE
ribo	Ara-1	ECB_01641	4.227853093033774	0.22196980810559935	0.5189345764616147	0.2432982395999947	NA	FALSE	FALSE
ribo	Ara-1	ECB_01642	3.459807389862616	0.08064136946095661	0.45812580802781705	0.6704047111701386	NA	FALSE	FALSE
ribo	Ara-1	ECB_01643	0.4555911253558825	0.0336452895390548	0.48984477590918146	0.6893604405292817	NA	FALSE	FALSE
ribo	Ara-1	ECB_01644	25.60824384019651	-0.38454983570594514	0.43718665728611583	0.17235981390486796	0.5042849358981505	FALSE	FALSE
ribo	Ara-1	ECB_01646	48069.73724870604	0.07497640610799934	0.24663835242174867	0.7245508811314986	0.9106074984247476	FALSE	FALSE
ribo	Ara-1	ECB_01647	46.28176029224315	0.15699742700580044	0.388610404112899	0.5376310703546112	0.8234462512012272	FALSE	FALSE
ribo	Ara-1	ECB_01648	45.50495069932344	0.44577181528780513	0.40777756113338737	0.12185825966922002	0.4270773594760076	FALSE	FALSE
ribo	Ara-1	ECB_01649	352.4398579899576	0.42086390161797976	0.4710286240950998	0.15473789359668438	0.47867516617292083	FALSE	FALSE
ribo	Ara-1	ECB_01650	241.43793295766136	0.24026736465646423	0.3890400056937893	0.3661887772522617	0.7145872803348582	FALSE	FALSE
ribo	Ara-1	ECB_01651	275.33736734651893	0.40086580031291	0.42997814361422665	0.16583226915419003	0.49626962148339165	FALSE	FALSE
ribo	Ara-1	ECB_01652	164.56105569175733	0.24261662767858969	0.4313621818560087	0.3547912059841641	0.7124027452997602	FALSE	FALSE
ribo	Ara-1	ECB_01653	105.88360669865743	0.2786479507363257	0.43980767488049516	0.29898323376871067	0.6646482047813582	FALSE	FALSE
ribo	Ara-1	ECB_01654	382.7993836692461	0.37639373849751523	0.3729353349450952	0.17229892808598918	0.5042849358981505	FALSE	FALSE
ribo	Ara-1	ECB_01655	88.8371522978275	0.38262838317789666	0.32835769070186077	0.13929534165706248	0.4595357949018706	FALSE	FALSE
ribo	Ara-1	ECB_01656	587.7704065169991	1.4316050644878628	0.34375104554305597	4.257551853110837e-6	1.3786138011323025e-4	FALSE	TRUE
ribo	Ara-1	ECB_01657	110.85950850392419	-0.07125047400087695	0.2876989180092225	0.7595079664143799	0.9277919968048076	FALSE	FALSE
ribo	Ara-1	ECB_01658	0.6241102941396235	-0.0706981789087125	0.49797116744968356	0.5045836950625779	NA	FALSE	FALSE
ribo	Ara-1	ECB_01660	0	NA	NA	NA	NA	FALSE	FALSE
ribo	Ara-1	ECB_01661	4.722984585190623	0.2225151754901974	0.49553899022287545	0.30054145863237836	NA	FALSE	FALSE
ribo	Ara-1	ECB_01662	187.2087566187872	-0.17165443645888645	0.26864110412400943	0.44509453654422576	0.771895548487263	FALSE	FALSE
ribo	Ara-1	ECB_01663	3.6342921835754693	-0.10715584733873032	0.47230580108667963	0.5478741461186694	NA	FALSE	FALSE
ribo	Ara-1	ECB_01664	6.363603503280946	-0.14075934494136919	0.44985800320753927	0.5248631929303833	NA	FALSE	FALSE
ribo	Ara-1	ECB_01665	10.231146636270436	-0.027760844264644566	0.40299309700315006	0.9050645030182676	0.9694208370851878	FALSE	FALSE
ribo	Ara-1	ECB_01666	2.8223291232220613	0.008406407513027632	0.46308420799622174	0.9610641487153756	NA	FALSE	FALSE
ribo	Ara-1	ECB_01667	5.71621094017848	-0.19442137766759068	0.5051496740337751	0.3022256251104851	NA	FALSE	FALSE
ribo	Ara-1	ECB_01668	3.308304872957832	-0.006698371238830205	0.4546395316301011	0.9697310650549638	NA	FALSE	FALSE
ribo	Ara-1	ECB_01669	0.8910207849648846	-0.014769602903397454	0.4843154656072515	0.9079182096123022	NA	FALSE	FALSE
ribo	Ara-1	ECB_01670	4.872327341985271	-0.09507430307859305	0.4505297562570596	0.6445626571134102	NA	FALSE	FALSE
ribo	Ara-1	ECB_01671	1374.5326622361645	-0.06718629094068844	0.40946109634591843	0.7719329176797964	0.9341968082340919	FALSE	FALSE
ribo	Ara-1	ECB_01673	270.209925708304	0.5983629817806381	0.420085461435668	0.051350601463733714	0.2632933593123283	FALSE	FALSE
ribo	Ara-1	ECB_01674	48.685361293509914	0.1951543291338649	0.4107783061795498	0.44789814699262387	0.7727578511739172	FALSE	FALSE
ribo	Ara-1	ECB_01675	109.6832124452481	0.29676671232861657	0.3661598768386946	0.26758520581509315	0.6301943203496244	FALSE	FALSE
ribo	Ara-1	ECB_01676	8.940854737419945	0.21152050919679677	0.44175097936752633	0.39287724546580166	0.7368133462701622	FALSE	FALSE
ribo	Ara-1	ECB_01677	70.25460894733754	-0.10203253464309163	0.33192582645604946	0.6778716143308894	0.8842737679678444	FALSE	FALSE
ribo	Ara-1	ECB_01678	41.77903864882018	-0.06869496655822692	0.31979522055036846	0.7777986364813979	0.9362011343105242	FALSE	FALSE
ribo	Ara-1	ECB_01679	174.20993561213336	-0.10024942537393043	0.30660623183581315	0.6756523571373435	0.8842737679678444	FALSE	FALSE
ribo	Ara-1	ECB_01680	44.40074224611372	0.3539135794749352	0.38161842956912884	0.195996764417344	0.5346834809517105	FALSE	FALSE
ribo	Ara-1	ECB_01681	1577.2257404258428	-0.2998127398320394	0.3555968785531229	0.24490556088959406	0.6034521636808111	FALSE	FALSE
ribo	Ara-1	ECB_01682	1941.7790863478936	0.14681314830233128	0.2609383290057155	0.5123721945237099	0.8097383381889293	FALSE	FALSE
ribo	Ara-1	ECB_01683	328.461429285006	0.3487769418631397	0.29973469767870115	0.15648965916292967	0.4792861546019609	FALSE	FALSE
ribo	Ara-1	ECB_01684	38.773441447337085	-0.08023647072647681	0.33080766871435957	0.7440710574106347	0.9216580790130066	FALSE	FALSE
ribo	Ara-1	ECB_01685	1545.9363034665982	0.3469690299292039	0.3316605354333343	0.18840197226687888	0.52275063533331	FALSE	FALSE
ribo	Ara-1	ECB_01686	584.351241637626	0.6944227536358529	0.3714198459470043	0.01840418578857351	0.13307298413631186	FALSE	FALSE
ribo	Ara-1	ECB_01687	1345.2822238858698	0.34366163616168394	0.3265002326937915	0.18401884064235713	0.5165724786484328	FALSE	FALSE
ribo	Ara-1	ECB_01688	3725.3088937014463	0.21319806848784226	0.28087568282607694	0.36359284282336524	0.7135329899675923	FALSE	FALSE
ribo	Ara-1	ECB_01690	4.897862326257087	0.05236028276103596	0.44539215211371647	0.7962062830066513	NA	FALSE	FALSE
ribo	Ara-1	ECB_01691	101.14396665106582	0.3145688470269203	0.44407269509667274	0.25471034183955205	0.6139013821521243	FALSE	FALSE
ribo	Ara-1	ECB_01692	123.57491593385177	-0.5607402262013851	0.3480108372137046	0.03720016805681974	0.2135246640486821	FALSE	FALSE
ribo	Ara-1	ECB_01693	43.41707967880706	-0.2687458298822164	0.36049503741707106	0.3016792508052428	0.6657660271683956	FALSE	FALSE
ribo	Ara-1	ECB_01694	40.91799287307976	-0.1548804706968463	0.36716998802677037	0.5379233561147025	0.8234705436103282	FALSE	FALSE
ribo	Ara-1	ECB_01695	58.39318582163768	-0.179232269552685	0.3180140353813767	0.46478682250386877	0.7848058027618643	FALSE	FALSE
ribo	Ara-1	ECB_01696	144.75125506944522	0.044744612075649226	0.31988922338855813	0.8600784762255362	0.9565919575291344	FALSE	FALSE
ribo	Ara-1	ECB_01697	6.092902775126195	0.9467634648301265	0.9309752972687575	0.024322583257893313	NA	FALSE	FALSE
ribo	Ara-1	ECB_01698	1618.1805300220126	-1.5467422412274023	0.45120761162777706	3.450430506162372e-5	8.785326904151886e-4	FALSE	TRUE
ribo	Ara-1	ECB_01699	8.561093828000617	-0.4537316544342315	0.6614552744750498	0.0905598626417326	0.3630926390440396	FALSE	FALSE
ribo	Ara-1	ECB_01700	22.720057296035396	0.03734611567130526	0.3633367331485029	0.8819754597549746	0.9639947629311393	FALSE	FALSE
ribo	Ara-1	ECB_01701	42.055748217160776	-0.04078730896422128	0.32666787667625774	0.8673759313623213	0.9614894369545474	FALSE	FALSE
ribo	Ara-1	ECB_01702	18.065458251029398	-0.2624411386433105	0.42507819250843754	0.31593053082184286	0.6854749099186234	FALSE	FALSE
ribo	Ara-1	ECB_01703	3.196090584326665	0.09964858486888346	0.4709656613570895	0.5722434390966266	NA	FALSE	FALSE
ribo	Ara-1	ECB_01704	10.0612563989554	-0.2744388056699604	0.4834909025156606	0.27285971285174626	0.6372916882330582	FALSE	FALSE
ribo	Ara-1	ECB_01705	9.02397116360216	0.4682752789003068	0.5779212481920134	0.11459378821049877	0.41652190116162713	FALSE	FALSE
ribo	Ara-1	ECB_01706	2.1502364500838924	0.13989906089229073	0.493934905448452	0.3787336942981048	NA	FALSE	FALSE
ribo	Ara-1	ECB_01707	16.436196697739643	-0.3118693734250744	0.44198757239394687	0.2485162079041829	0.6069894306443948	FALSE	FALSE
ribo	Ara-1	ECB_01708	135.43974322812113	0.21745495198052717	0.3005573544670693	0.37116945042068583	0.7175300407548495	FALSE	FALSE
ribo	Ara-1	ECB_01709	766.2710828704279	0.26637280458133306	0.25447656531500223	0.22746444868022012	0.5826453934809765	FALSE	FALSE
ribo	Ara-1	ECB_01710	58.29368013447305	-0.03358219284023477	0.31431154897922864	0.8890156192281644	0.9668878332694049	FALSE	FALSE
ribo	Ara-1	ECB_01711	1.5216017639399193	0.2671533725390255	0.5785349593929504	0.07307397510140273	NA	FALSE	FALSE
ribo	Ara-1	ECB_01712	27.881477778047977	-0.010736409297953178	0.3515514868704451	0.9642242724611002	0.9868900428599467	FALSE	FALSE
ribo	Ara-1	ECB_01713	3.694475204371002	0.284380260179038	0.5431845031318832	0.19267856524277263	NA	FALSE	FALSE
ribo	Ara-1	ECB_01714	6.951850412121742	-0.16401748847367187	0.45570865893618057	0.46278616434197495	NA	FALSE	FALSE
ribo	Ara-1	ECB_01715	12.393049699420194	0.2213700257027159	0.44540498376822746	0.3746333455598758	0.7190932580044266	FALSE	FALSE
ribo	Ara-1	ECB_01716	2.184346128403248	0.30824784449173537	0.5924782088273272	0.10628755275617502	NA	FALSE	FALSE
ribo	Ara-1	ECB_01717	5.390480565050065	0.08968153548513466	0.44398420274302797	0.6722988166493578	NA	FALSE	FALSE
ribo	Ara-1	ECB_01718	161.03155117876844	0.4847675674967599	0.3215507524926975	0.06294898573077155	0.29438779983040575	FALSE	FALSE
ribo	Ara-1	ECB_01719	8.634578031966264	0.024172846360373635	0.426454464124277	0.9139819381383543	0.9724114977550561	FALSE	FALSE
ribo	Ara-1	ECB_01721	5.640906938126957	0.30206330638034595	0.5295929410826794	0.20267804030207687	NA	FALSE	FALSE
ribo	Ara-1	ECB_01722	12.278042235163117	-0.3791763337050064	0.5155556979353934	0.17097087734628696	0.5022901810794762	FALSE	FALSE
ribo	Ara-1	ECB_01723	57.65209556643331	0.385376428040905	0.3592782587901382	0.15517579093264347	0.4790692464575794	FALSE	FALSE
ribo	Ara-1	ECB_01724	19.74133584995167	0.24003821343169385	0.388187123475607	0.36038635017346043	0.7124027452997602	FALSE	FALSE
ribo	Ara-1	ECB_01725	23.245897570737288	0.5110880748281587	0.48802772074530293	0.09861198147245388	0.3820092234153967	FALSE	FALSE
ribo	Ara-1	ECB_01726	143.1701870745226	1.1450330338492372	0.5780164683695629	0.0061007679062869144	0.06537477551377237	FALSE	FALSE
ribo	Ara-1	ECB_01727	31.725854582088072	-0.1364353963746875	0.365522625746978	0.5879550175525845	0.848689622321252	FALSE	FALSE
ribo	Ara-1	ECB_01728	29.652479725957082	-0.1618467494564115	0.3686420963187458	0.5208868949949113	0.8108550112556321	FALSE	FALSE
ribo	Ara-1	ECB_01729	7.813767987137858	-0.7464149932595688	0.9535169598966017	0.0452328342318829	NA	FALSE	FALSE
ribo	Ara-1	ECB_01730	5019.548934178763	0.17449274389871605	0.3003237441087874	0.47295840421718716	0.789122952137779	FALSE	FALSE
ribo	Ara-1	ECB_01732	91.50339816424288	0.414037666264484	0.32233831503676863	0.10852032322609385	0.40511534196808724	FALSE	FALSE
ribo	Ara-1	ECB_01733	609.6033067486416	0.11038675696090637	0.30301514277553726	0.6484428428535816	0.8773593484120318	FALSE	FALSE
ribo	Ara-1	ECB_01734	1010.6220554589299	0.2643785529623481	0.30004761482826786	0.2801661029136199	0.6456335927070651	FALSE	FALSE
ribo	Ara-1	ECB_01735	432.4462644132116	0.12489536891451757	0.2892969930059383	0.5993243259559515	0.8538731620592478	FALSE	FALSE
ribo	Ara-1	ECB_01736	109.59929480973248	0.09456882838163465	0.3264015422327169	0.7071556341319947	0.903948711522951	FALSE	FALSE
ribo	Ara-1	ECB_01737	108.63309629841874	0.2269712617075543	0.30768682297305516	0.3575915793806177	0.7124027452997602	FALSE	FALSE
ribo	Ara-1	ECB_01738	2.834059223257404	-0.13334888888649474	0.48512468465227276	0.44025184884678875	NA	FALSE	FALSE
ribo	Ara-1	ECB_01739	23.35692049232954	0.11697115039024536	0.38129886969874915	0.6431764915532145	0.8750563187352711	FALSE	FALSE
ribo	Ara-1	ECB_01740	3.472331197248577	-0.014833525335924743	0.45186239859714206	0.9355755946888138	NA	FALSE	FALSE
ribo	Ara-1	ECB_01741	1.5826769933719844	-0.009785963893084242	0.47339044699553606	0.9448338372834781	NA	FALSE	FALSE
ribo	Ara-1	ECB_01742	5.4730833129885275	0.3115665237490311	0.5413484137485892	0.1867105882585259	NA	FALSE	FALSE
ribo	Ara-1	ECB_01743	6.977004097187493	0.16617848872511096	0.44835561482054753	0.4720718557971884	NA	FALSE	FALSE
ribo	Ara-1	ECB_01744	1.874581762313949	0.1669645806275528	0.5035881171238643	0.30997135537749393	NA	FALSE	FALSE
ribo	Ara-1	ECB_01745	8.302076869770081	0.5164154002663187	0.6196666062088432	0.09432005199606124	NA	FALSE	FALSE
ribo	Ara-1	ECB_01746	197.00295641260152	0.4282265227554924	0.3866554918044782	0.13017654018224423	0.44370241785229464	FALSE	FALSE
ribo	Ara-1	ECB_01747	211.1611111223442	0.29450309123587154	0.3279655070349385	0.25159124087660495	0.6104160825505703	FALSE	FALSE
ribo	Ara-1	ECB_01748	14488.77100644579	0.14394356915801182	0.25888998172936273	0.5170935046292355	0.8104561270258305	FALSE	FALSE
ribo	Ara-1	ECB_01749	456.45716622883987	0.1898271139610982	0.3233597564037671	0.45054337587894555	0.7749242013529901	FALSE	FALSE
ribo	Ara-1	ECB_01750	34.806234799217144	0.14782554991834443	0.3494618549870469	0.5594448712186371	0.8348934827032845	FALSE	FALSE
ribo	Ara-1	ECB_01751	918.0639412026654	0.2624083371579508	0.32418554650654297	0.3021944439529807	0.6657660271683956	FALSE	FALSE
ribo	Ara-1	ECB_01752	5.406050159930486	-0.10702048609283232	0.4500440813867497	0.6067475159189812	NA	FALSE	FALSE
ribo	Ara-1	ECB_01753	2.5844663688094403	0.05964354991652375	0.4649121130392326	0.7303189505237757	NA	FALSE	FALSE
ribo	Ara-1	ECB_01754	1.5132730271675212	0.020588429431277675	0.4770477563998269	0.8754067297191188	NA	FALSE	FALSE
ribo	Ara-1	ECB_01755	12.358501447713081	0.13936446768283003	0.42230318281212964	0.5600977920040768	0.8348934827032845	FALSE	FALSE
ribo	Ara-1	ECB_01756	210.6600876275214	0.07301088792683018	0.29275002501290537	0.7592925470319936	0.9277919968048076	FALSE	FALSE
ribo	Ara-1	ECB_01757	3.7825247448545167	-0.024038528722888315	0.45898466428548196	0.8886987065682533	NA	FALSE	FALSE
ribo	Ara-1	ECB_01758	7.870297055019537	0.15518212089175001	0.43714857857491096	0.508823397229792	NA	FALSE	FALSE
ribo	Ara-1	ECB_01759	8.688720684662432	0.06373999953176063	0.42265662411522475	0.779137406005445	0.9364701574842337	FALSE	FALSE
ribo	Ara-1	ECB_01760	4.6137700915233975	-0.06676166770403441	0.45234735145640786	0.7322398831433874	NA	FALSE	FALSE
ribo	Ara-1	ECB_01761	60.91668204339264	0.36935014893706897	0.3611668946042667	0.17083547372588834	0.5022901810794762	FALSE	FALSE
ribo	Ara-1	ECB_01762	44.097285576300074	-0.42967479664145347	0.39293123985715417	0.1223373189682373	0.4278423014242414	FALSE	FALSE
ribo	Ara-1	ECB_01763	139.35124386599477	-0.02134721301217326	0.30468890172374175	0.927920628497906	0.976088914111246	FALSE	FALSE
ribo	Ara-1	ECB_01764	361.7555309498117	-0.20732930049941703	0.3436841709626795	0.4097827051081454	0.7498392292438227	FALSE	FALSE
ribo	Ara-1	ECB_01765	0.12329239785853273	-0.01563414401276606	0.49482465459085223	0.9268960539205255	NA	FALSE	FALSE
ribo	Ara-1	ECB_01766	0.190516034655587	-0.019486400556278077	0.49500792072779093	0.9685250789172494	NA	FALSE	FALSE
ribo	Ara-1	ECB_01768	48.55736762097749	-0.054855850464691484	0.34490385804952983	0.8240135421557875	0.9468828631948973	FALSE	FALSE
ribo	Ara-1	ECB_01769	14.226546459535612	0.10440787596369704	0.40343923717347685	0.6688699283782262	0.8824930257614242	FALSE	FALSE
ribo	Ara-1	ECB_01770	23.08540998887432	-0.12435192668055717	0.37343292148145524	0.6176289225772897	0.8595152928998901	FALSE	FALSE
ribo	Ara-1	ECB_01771	0.8629864044341453	-0.01270786990255693	0.48398061573859996	0.9245481261816092	NA	FALSE	FALSE
ribo	Ara-1	ECB_01772	3.7227071125611184	0.014298085713113159	0.4489526410881043	0.9416612489868548	NA	FALSE	FALSE
ribo	Ara-1	ECB_01773	4.066907213375491	0.1255523928761381	0.46627703287260874	0.5188262330266433	NA	FALSE	FALSE
ribo	Ara-1	ECB_01774	81.2520655383163	0.45663002653775114	0.41701650337529655	0.11940688550033074	0.4270773594760076	FALSE	FALSE
ribo	Ara-1	ECB_01775	78.25752080315999	0.23611037284197173	0.335257013549087	0.35722472979307635	0.7124027452997602	FALSE	FALSE
ribo	Ara-1	ECB_01776	121.41210973393729	-0.007747945319680394	0.3106407197755369	0.9730897724550736	0.9886412229953744	FALSE	FALSE
ribo	Ara-1	ECB_01777	112.3836732612245	0.4008657091611584	0.3805976585618573	0.15121139709555803	0.473668508882931	FALSE	FALSE
ribo	Ara-1	ECB_01778	78.03165681381391	0.2922562218633553	0.3403805577421934	0.2618789187027722	0.6225560757158556	FALSE	FALSE
ribo	Ara-1	ECB_01779	272.7199861717626	0.9586250119311922	0.3534010894294651	0.0013357618600028601	0.020302217249737346	FALSE	FALSE
ribo	Ara-1	ECB_01780	44.59534929145919	0.31172809418786845	0.3518058471750835	0.23694924809848272	0.5946687532311542	FALSE	FALSE
ribo	Ara-1	ECB_01781	39.077560403050775	0.07613400432080426	0.3312758600871013	0.7599821237280306	0.9277919968048076	FALSE	FALSE
ribo	Ara-1	ECB_01782	99.41976592391448	0.5059445132668108	0.40969426236190437	0.08702691707106264	0.35272542306761306	FALSE	FALSE
ribo	Ara-1	ECB_01783	54.85144826565978	0.4581628043281069	0.4004465238698157	0.11233316851771025	0.41337041254577556	FALSE	FALSE
ribo	Ara-1	ECB_01784	163.85710439548234	0.3625691881766727	0.39367101678187905	0.19477017242272573	0.5339960484890542	FALSE	FALSE
ribo	Ara-1	ECB_01785	9.905960800598589	0.3034734770286815	0.47956333583818384	0.24445139214767297	0.6034197726844281	FALSE	FALSE
ribo	Ara-1	ECB_01786	93.37146672989194	0.1892881677195673	0.3039184261501909	0.43848090285254243	0.768373299763367	FALSE	FALSE
ribo	Ara-1	ECB_01787	732.4671267374694	1.2131988517919294	0.4323662586933477	7.251240216772568e-4	0.012558979421956674	FALSE	FALSE
ribo	Ara-1	ECB_01788	1459.4486597743194	1.1202200130072466	0.4268714388176506	0.0013576409529967581	0.020426325247360315	FALSE	FALSE
ribo	Ara-1	ECB_01789	1287.6655330360697	0.6648405523913827	0.35825357558558407	0.020466410038894593	0.1428759297980624	FALSE	FALSE
ribo	Ara-1	ECB_01790	38.543054877454345	1.1109404863593246	0.4795654292953209	0.002878169625068103	0.037820433464994564	FALSE	FALSE
ribo	Ara-1	ECB_01791	6.706242812087537	0.8263790941119915	1.2111528074404987	0.030186862743274267	NA	FALSE	FALSE
ribo	Ara-1	ECB_01792	84.70053229937416	0.448998064327499	0.40883725762166834	0.12236375992395222	0.4278423014242414	FALSE	FALSE
ribo	Ara-1	ECB_01793	7618.469092682451	0.3730326170959291	0.25478503126867935	0.09179402304550414	0.36656085074069283	FALSE	FALSE
ribo	Ara-1	ECB_01794	51.27075214694081	1.2001403962830983	0.45427596220379723	0.001055055024526873	0.016807534321206175	FALSE	FALSE
ribo	Ara-1	ECB_01795	355.46603159665705	-0.12369638308083282	0.30578968053601224	0.6066473792842169	0.8548734829175411	FALSE	FALSE
ribo	Ara-1	ECB_01796	205.03737577325796	-0.3683768054142071	0.3194570500301595	0.14075355264761716	0.4603095758237241	FALSE	FALSE
ribo	Ara-1	ECB_01797	37.93457861831253	0.31629428739372867	0.37034827364071343	0.24073276515315659	0.5991672210957893	FALSE	FALSE
ribo	Ara-1	ECB_01798	371.4027917344137	-0.16561573297028678	0.2566587445925508	0.44824624599816343	0.7727578511739172	FALSE	FALSE
ribo	Ara-1	ECB_01799	20.13576805934974	-0.009048867788567857	0.39769939135464044	0.9683424317246332	0.9873213478816388	FALSE	FALSE
ribo	Ara-1	ECB_01800	351.50827366737855	-0.3522314721231055	0.3370976889430163	0.16801952267225187	0.49754488870838803	FALSE	FALSE
ribo	Ara-1	ECB_01801	859.4242848762424	0.3274648093008011	0.31154170559553773	0.19279569752598075	0.5303216832224346	FALSE	FALSE
ribo	Ara-1	ECB_01802	551.3012219250313	0.045931486046163456	0.3229718568678303	0.8533786752355281	0.9550019059078281	FALSE	FALSE
ribo	Ara-1	ECB_01803	805.9990149766621	-0.09827392209402444	0.2896476983371054	0.6737685925259087	0.8842737679678444	FALSE	FALSE
ribo	Ara-1	ECB_01804	61.11321676976923	0.04313297035750754	0.32994966345480287	0.8622055610118267	0.9580419120679714	FALSE	FALSE
ribo	Ara-1	ECB_01805	179.32050458491761	0.19229561940977394	0.30456801593482585	0.4298407937519195	0.7626537966569198	FALSE	FALSE
ribo	Ara-1	ECB_01806	70.0712608432714	1.1284895267020063	0.5030348059976755	0.003478109799410334	0.044090591882737805	FALSE	FALSE
ribo	Ara-1	ECB_01807	38.078503492280866	-0.20805628773683768	0.3732469019408052	0.4182768880751561	0.7535718581220333	FALSE	FALSE
ribo	Ara-1	ECB_01808	10.319971201354598	-0.21301794961480558	0.4467213327663617	0.38487756191026445	0.731235965020532	FALSE	FALSE
ribo	Ara-1	ECB_01809	6.329909304731704	0.04686210951916637	0.43594570963906676	0.8240107207269134	NA	FALSE	FALSE
ribo	Ara-1	ECB_01810	146.38822776387568	0.1895448381749321	0.29967557051397004	0.43655698814651817	0.7663768125056762	FALSE	FALSE
ribo	Ara-1	ECB_01811	81.9419957364217	0.09656633714990989	0.30255608279222057	0.6898154095981475	0.8911362121391506	FALSE	FALSE
ribo	Ara-1	ECB_01812	175.80173986843317	-0.06391859574795479	0.2980209302641561	0.7863644586453975	0.9392306712216085	FALSE	FALSE
ribo	Ara-1	ECB_01813	47.66626392871052	0.8318402938174021	0.46537315259507034	0.014734958903711914	0.11644984436876019	FALSE	FALSE
ribo	Ara-1	ECB_01814	10.310772541261315	-0.17795603392111026	0.4409027222273619	0.4577686839376665	0.7805912475388143	FALSE	FALSE
ribo	Ara-1	ECB_01815	100.9681788512008	0.012818223887521388	0.2829745716486219	0.9570115878138014	0.9838858864535125	FALSE	FALSE
ribo	Ara-1	ECB_01816	50.097516919313996	0.17364873114869847	0.3270821420031016	0.48968011246630316	0.7962647680333609	FALSE	FALSE
ribo	Ara-1	ECB_01817	107.29193115044085	0.3545743528082505	0.33844702334472754	0.1763429661349896	0.5085437522905459	FALSE	FALSE
ribo	Ara-1	ECB_01818	104.21009791649074	-0.04771494410402714	0.28796598922282135	0.8374303119429753	0.9507259524687971	FALSE	FALSE
ribo	Ara-1	ECB_01819	173.1567222460398	-0.10440686038608095	0.3068330911046062	0.6644399650604462	0.882071474892192	FALSE	FALSE
ribo	Ara-1	ECB_01820	546.8837537889192	0.7888833157557699	0.5331673405378567	0.028049227324043767	0.17858236209609932	FALSE	FALSE
ribo	Ara-1	ECB_01821	1129.5174062236574	0.04110686724524921	0.24924050401311218	0.8549178256883474	0.9556477995806305	FALSE	FALSE
ribo	Ara-1	ECB_01822	114.62721856318655	-0.08889023498677442	0.29966796184286054	0.7085977868383628	0.903948711522951	FALSE	FALSE
ribo	Ara-1	ECB_01823	1232.7446196099356	0.2621182165705883	0.25279826800431004	0.2322204911099264	0.5892545511213549	FALSE	FALSE
ribo	Ara-1	ECB_01824	45.77322854477406	0.5000832342213044	0.3921666658296583	0.08319551623478881	0.3437440261628792	FALSE	FALSE
ribo	Ara-1	ECB_01825	970.5505444539695	0.293937422507594	0.2919579651982655	0.22385658501505917	0.5758797640413309	FALSE	FALSE
ribo	Ara-1	ECB_01826	276.24901683862186	0.29351926504516435	0.2618528214598904	0.19176396982167065	0.5293332423781889	FALSE	FALSE
ribo	Ara-1	ECB_01827	502.15572106675074	0.31282333883335106	0.2864559875907619	0.1908159720763697	0.52780016788812	FALSE	FALSE
ribo	Ara-1	ECB_01828	13215.404539480256	-0.05929562403898641	0.3147183366158715	0.8037300806058205	0.9441293020996605	FALSE	FALSE
ribo	Ara-1	ECB_01829	413.6739503167443	-0.17271026385121271	0.25261036549678	0.42422401318848313	0.7576518796693592	FALSE	FALSE
ribo	Ara-1	ECB_01830	574.5771351347526	-0.3036410488169104	0.2899256607792536	0.19722865786675553	0.5365700198950363	FALSE	FALSE
ribo	Ara-1	ECB_01831	127.77551877021159	-0.008847373683321941	0.2701484576421189	0.9676302810479042	0.9871817148088036	FALSE	FALSE
ribo	Ara-1	ECB_01832	118.61052662594875	0.1156850059228163	0.27245835522302064	0.613324356370673	0.8587663663367787	FALSE	FALSE
ribo	Ara-1	ECB_01833	1.8479340038400003	0.09265094006497675	0.4812804643722233	0.5378514019113215	NA	FALSE	FALSE
ribo	Ara-1	ECB_01834	86.9957121341427	1.2528632240272135	0.4716239903298696	9.908845524634257e-4	0.016164430792499327	FALSE	FALSE
ribo	Ara-1	ECB_01835	1086.5255507695072	0.4125384591257306	0.27702948630971375	0.08092042715915104	0.3371495839260293	FALSE	FALSE
ribo	Ara-1	ECB_01836	68.05886026398194	0.31441607940469884	0.3452953728135731	0.23072460492409225	0.5872170690180679	FALSE	FALSE
ribo	Ara-1	ECB_01837	1925.7436650316017	0.6407922385151011	0.30228700780673573	0.012369993932115606	0.1062766449598079	FALSE	FALSE
ribo	Ara-1	ECB_01838	39.18851740667348	0.13926666512172606	0.3416534831390415	0.5803228829885221	0.8458316936079037	FALSE	FALSE
ribo	Ara-1	ECB_01839	7.61482150380505	-0.21929940199977685	0.48071425647944815	0.335446306995907	NA	FALSE	FALSE
ribo	Ara-1	ECB_01840	19.417356081261403	-0.22201097765533162	0.40904277712336656	0.3871823474310684	0.7316563517473738	FALSE	FALSE
ribo	Ara-1	ECB_01841	54.97200625447194	0.24817064154237437	0.34455647872006934	0.33817775995882204	0.696047254098899	FALSE	FALSE
ribo	Ara-1	ECB_01842	103.29127114508135	0.4072206859205067	0.3683809103751988	0.14021933073273332	0.4603095758237241	FALSE	FALSE
ribo	Ara-1	ECB_01843	22.218980889847995	0.1799724349020606	0.37973664023389514	0.48287377296007944	0.7920274968632898	FALSE	FALSE
ribo	Ara-1	ECB_01844	2.9276198154438493	0.4863541320539959	0.7836609065895839	0.04491659827244186	NA	FALSE	FALSE
ribo	Ara-1	ECB_01845	73.38961896135974	0.36564274404714836	0.34955546078570976	0.1702035952072115	0.5020163466557258	FALSE	FALSE
ribo	Ara-1	ECB_01846	128.58184008320643	0.028816802969467134	0.2842382999803333	0.9018461566764502	0.9684721821852255	FALSE	FALSE
ribo	Ara-1	ECB_01847	577.7994523483568	0.7312593205365651	0.463482917089789	0.02821742453828077	0.17858236209609932	FALSE	FALSE
ribo	Ara-1	ECB_01848	11.213917985408512	-1.883869357877273	1.0277926711295298	0.006427784464766571	0.06766208452487497	FALSE	FALSE
ribo	Ara-1	ECB_01849	55.23284151988646	-2.890619505175063	0.6720062655397591	8.355662152184297e-7	3.191220198891926e-5	FALSE	TRUE
ribo	Ara-1	ECB_01850	772.832936937882	-3.4167292022782525	0.36904080997526556	5.188624867615486e-22	1.0304608987084355e-19	FALSE	TRUE
ribo	Ara-1	ECB_01851	463.25904067672025	-3.6528559420555253	0.4486121424956896	9.00024379016662e-18	1.2187148295866526e-15	FALSE	TRUE
ribo	Ara-1	ECB_01852	17.817981272126193	-0.5013984212123803	0.5265497357178521	0.10172928563295447	0.387464773632202	FALSE	FALSE
ribo	Ara-1	ECB_01853	31.515643827522066	0.06448568952523533	0.35643547347715465	0.796454351750449	0.9419496083189345	FALSE	FALSE
ribo	Ara-1	ECB_01854	5.499455086726909	-0.14404117728637741	0.4609960328533165	0.49777240894619645	NA	FALSE	FALSE
ribo	Ara-1	ECB_01855	2.9393478329644442	-0.11984850695914025	0.4850748231917268	0.45979348583216867	NA	FALSE	FALSE
ribo	Ara-1	ECB_01856	3.78617741289242	0.12317829951240523	0.47067802421238353	0.5210761810338761	NA	FALSE	FALSE
ribo	Ara-1	ECB_01857	2.3492183685956713	0.09701807970779389	0.4841023263296154	0.5124641442248217	NA	FALSE	FALSE
ribo	Ara-1	ECB_01858	23.79777400763774	-0.151984019200125	0.3766988865444601	0.5469678677745742	0.8302194565651532	FALSE	FALSE
ribo	Ara-1	ECB_01859	10.904942027683608	-0.05175663548736718	0.4076961663822286	0.8250846320229714	0.9468828631948973	FALSE	FALSE
ribo	Ara-1	ECB_01860	1.314095331783073	-0.06815675337281757	0.4852711256899695	0.5982119959867043	NA	FALSE	FALSE
ribo	Ara-1	ECB_01861	0.6634637797672538	-0.06076679034181235	0.4972372149463041	0.5411290754483247	NA	FALSE	FALSE
ribo	Ara-1	ECB_01862	118.67737696867513	-0.37238393988958235	0.3814758264604106	0.16739788341591344	0.49674128508813165	FALSE	FALSE
ribo	Ara-1	ECB_01863	49.061905075386946	-0.4409273858018496	0.43090636094461515	0.12352377222007487	0.43085860040010215	FALSE	FALSE
ribo	Ara-1	ECB_01864	29.260538367181795	-0.24736464057458835	0.42073585881971753	0.3368536552689688	0.6958994722928281	FALSE	FALSE
ribo	Ara-1	ECB_01865	50.932028003558216	-0.39816395337717303	0.3969644870541132	0.14974077259741375	0.4722175014731259	FALSE	FALSE
ribo	Ara-1	ECB_01866	17.485211253741994	-0.3472483888862552	0.4528315953941119	0.21054909534963115	0.5545762644089753	FALSE	FALSE
ribo	Ara-1	ECB_01867	17.624199747078702	-0.6273058693626885	0.5755102633792019	0.06111016071415912	0.2871406447436593	FALSE	FALSE
ribo	Ara-1	ECB_01868	6.637867103760267	0.005140039098136838	0.42348338845167993	0.9823157830306319	NA	FALSE	FALSE
ribo	Ara-1	ECB_01869	3.487486194624871	0.3237403970609848	0.5725300885105168	0.14349128205173656	NA	FALSE	FALSE
ribo	Ara-1	ECB_01870	28.38300675498411	0.7838871813866132	0.4619000399952962	0.018674326247953323	0.13437395626244675	FALSE	FALSE
ribo	Ara-1	ECB_01871	31.343316349415534	-0.027696808042919262	0.35532261459859954	0.909969929819516	0.9702220547359836	FALSE	FALSE
ribo	Ara-1	ECB_01872	363.14855112710205	-3.483518154132258	0.47972567305303515	1.1365382684032436e-14	1.025984091385837e-12	FALSE	TRUE
ribo	Ara-1	ECB_01873	369.44447808340504	2.1771122310787763	0.7778122078079185	4.3684491759580547e-4	0.008350033303584402	FALSE	TRUE
ribo	Ara-1	ECB_01874	38.52568332093493	1.9104845425042234	0.4999314545570038	1.2167563175878037e-5	3.5191427864990945e-4	FALSE	TRUE
ribo	Ara-1	ECB_01875	39.58657381193054	0.6014489988515123	0.6113940371247563	0.07384271067827218	0.3197346440560651	FALSE	FALSE
ribo	Ara-1	ECB_01876	334.9010016671251	0.11908439779103137	0.3067409082161707	0.6258507766778979	0.8646189726635053	FALSE	FALSE
ribo	Ara-1	ECB_01877	332.52883933277826	-0.31570045508791345	0.2728277461167563	0.165422109618038	0.49626962148339165	FALSE	FALSE
ribo	Ara-1	ECB_01878	94.79052253325014	0.05618549281725524	0.28822047840674353	0.8119299777923226	0.9466025468786383	FALSE	FALSE
ribo	Ara-1	ECB_01879	178.12619062936403	1.344957775711026	0.44606683005244624	3.301564258866085e-4	0.006645513464298694	FALSE	TRUE
ribo	Ara-1	ECB_01882	2.3869540201148705	-0.14897302003253896	0.5065470017883729	0.2962095516358067	NA	FALSE	FALSE
ribo	Ara-1	ECB_01883	40.20942724723458	-0.22070152603954835	0.37817699281818895	0.3940688306413971	0.7378954753343009	FALSE	FALSE
ribo	Ara-1	ECB_01884	30.538366037005094	-0.3293069112669557	0.40702049245073846	0.22441680085178972	0.5768228211712525	FALSE	FALSE
ribo	Ara-1	ECB_01885	17.14085566390722	-0.9605241235292822	0.7469885176005792	0.021085062825125542	0.145736431916587	FALSE	FALSE
ribo	Ara-1	ECB_01886	16.984454461711298	-0.27074393454218976	0.4448374815606786	0.2948413398128722	0.6604002641372528	FALSE	FALSE
ribo	Ara-1	ECB_01887	19.595481567947203	-0.4108982496767972	0.47990705904663494	0.15067890548619203	0.472995215430312	FALSE	FALSE
ribo	Ara-1	ECB_01888	8560.671164353851	-0.15445904897966534	0.2508287528665849	0.47080847024658845	0.7875005237869663	FALSE	FALSE
ribo	Ara-1	ECB_01889	53.23500089776438	0.19109261628117238	0.33635285000934123	0.45118117623308956	0.7755734125784037	FALSE	FALSE
ribo	Ara-1	ECB_01890	32.26464426534453	-0.12361570466969979	0.355687075655019	0.6223154203055546	0.8626326732759536	FALSE	FALSE
ribo	Ara-1	ECB_01891	60.68721013751688	0.197166922775537	0.3365187803160082	0.43700704747955443	0.7666737485639813	FALSE	FALSE
ribo	Ara-1	ECB_01893	433.1991334241555	-0.23467995426180785	0.4004080753078349	0.35983596182611244	0.7124027452997602	FALSE	FALSE
ribo	Ara-1	ECB_01894	504.81745644588625	-0.2048522993672414	0.28044103200504994	0.37372680861191704	0.718541055881209	FALSE	FALSE
ribo	Ara-1	ECB_01895	1065.2543761786671	1.1296157634718738	0.2879290520444255	1.561500831381132e-5	4.388406581777729e-4	FALSE	TRUE
ribo	Ara-1	ECB_01896	42.26268361226499	-0.04850985125779069	0.3424775579978658	0.8434123503538346	0.9520747979174207	FALSE	FALSE
ribo	Ara-1	ECB_01897	232.93470272373455	-0.9231743153475123	0.5059433458866596	0.008077622945716128	0.07863803514800112	FALSE	FALSE
ribo	Ara-1	ECB_01898	25.17972626246425	0.18600664503717118	0.5169470197002642	0.2588621615325752	0.6199807774466729	FALSE	FALSE
ribo	Ara-1	ECB_01899	31.662832851294937	0.052782119024089864	0.35558935854109675	0.8326222335409132	0.9484268248875608	FALSE	FALSE
ribo	Ara-1	ECB_01900	65.25382012503245	-0.20164724624665956	0.31321697729872505	0.4094265247737809	0.7498392292438227	FALSE	FALSE
ribo	Ara-1	ECB_01901	83.19947278074879	-0.5836030878195038	0.370656129303081	0.03731174328361002	0.2137532370036043	FALSE	FALSE
ribo	Ara-1	ECB_01902	18.006130180828222	-0.3969650615515349	0.479546854508391	0.16200634880990095	0.4904643425860721	FALSE	FALSE
ribo	Ara-1	ECB_01906	2.679450483916415	-0.20266971855237192	0.5229451252373579	0.22280768141766358	NA	FALSE	FALSE
ribo	Ara-1	ECB_01907	0.6941871521773771	-0.06244982544365277	0.4976552849251236	0.5125794033447091	NA	FALSE	FALSE
ribo	Ara-1	ECB_01908	0	NA	NA	NA	NA	FALSE	FALSE
ribo	Ara-1	ECB_01909	0.9323854092329926	0.10894421445783914	0.5008013309531704	0.29452854741713613	NA	FALSE	FALSE
ribo	Ara-1	ECB_01910	1361.5754020154604	0.6850754240074285	0.38373585839457514	0.02219883041551935	0.15202371450076355	FALSE	FALSE
ribo	Ara-1	ECB_01911	15.593249743286286	0.04813674822734213	0.38192298323501	0.8451208800526926	0.9532809926834424	FALSE	FALSE
ribo	Ara-1	ECB_01912	83.77097419388063	-0.3797568894272812	0.4235971792209485	0.16913220919234417	0.4996207551949258	FALSE	FALSE
ribo	Ara-1	ECB_01913	5.8774470536240475	-0.09470777843049501	0.4431511530327864	0.6567903083296804	NA	FALSE	FALSE
ribo	Ara-1	ECB_01914	138.40264477277128	0.1481206302121696	0.3121150747600716	0.5477752105585785	0.8302194565651532	FALSE	FALSE
ribo	Ara-1	ECB_01915	199.71609053380274	-1.4570719302159816	0.48748124323080855	1.7379947571120668e-4	0.003724810346357444	FALSE	TRUE
ribo	Ara-1	ECB_01916	476.09546268005124	-1.718810719962112	0.38125008047759273	3.66683817653966e-7	1.4564681237215528e-5	FALSE	TRUE
ribo	Ara-1	ECB_01917	575.6869883097332	1.4347895879535706	0.58812831200194	0.0016000203104607012	0.023251026852987456	FALSE	FALSE
ribo	Ara-1	ECB_01918	62.189944843232574	0.3881908431892277	0.3419020989691141	0.14137867522544936	0.4603095758237241	FALSE	FALSE
ribo	Ara-1	ECB_01919	768.7070650570429	0.12187101079978742	0.2741468088310198	0.598548502338129	0.8538731620592478	FALSE	FALSE
ribo	Ara-1	ECB_01920	83.4955049649219	-0.1378365876309684	0.34107272165656927	0.5800788469977807	0.8458316936079037	FALSE	FALSE
ribo	Ara-1	ECB_01921	5089.593279460344	-0.04174092642797497	0.3646234642935237	0.8688632950396757	0.9614894369545474	FALSE	FALSE
ribo	Ara-1	ECB_01922	2163.4107378681233	0.08106418183260117	0.37291982498134746	0.7482779315846181	0.9226851433481728	FALSE	FALSE
ribo	Ara-1	ECB_01923	958.7385876543265	0.6239912751630791	0.4459538764352836	0.049256127426796255	0.258334513388074	FALSE	FALSE
ribo	Ara-1	ECB_01924	1887.3326295134298	1.0232426832570891	0.532401213608771	0.008335103344295876	0.08009765439566909	FALSE	FALSE
ribo	Ara-1	ECB_01925	953.0469872229642	0.5865988322821949	0.4443052306743173	0.060697101230949076	0.28588321778298975	FALSE	FALSE
ribo	Ara-1	ECB_01926	874.1536207863364	0.9797730646053131	0.5334874535483802	0.010526424056715625	0.09478485486415356	FALSE	FALSE
ribo	Ara-1	ECB_01927	626.6233613997588	1.0387216733258655	0.5267849119783667	0.007316253202784322	0.07489731371510136	FALSE	FALSE
ribo	Ara-1	ECB_01928	1828.890520694233	1.5088854642927996	0.4955867274959096	2.681344596550832e-4	0.005508776243534434	FALSE	TRUE
ribo	Ara-1	ECB_01929	299.6491176985698	0.47751550425702055	0.3785816481887759	0.09300219792105338	0.3679329981498247	FALSE	FALSE
ribo	Ara-1	ECB_01930	3.4679648533533345	0.06050635449943615	0.4542038598674802	0.7512676996571923	NA	FALSE	FALSE
ribo	Ara-1	ECB_01931	1646.0267107375664	-0.1523480253629588	0.283911263876764	0.5105655323560596	0.8087960773988739	FALSE	FALSE
ribo	Ara-1	ECB_01955	6.889891538024437	0.11562819623058933	0.43160438992304573	0.6127922461008162	NA	FALSE	FALSE
ribo	Ara-1	ECB_01956	0.7035021625541549	0.025474932516551085	0.48757953403329124	0.7899149409249556	NA	FALSE	FALSE
ribo	Ara-1	ECB_01957	1.001262526387292	0.06591687979285721	0.4852381519323639	0.598163068503003	NA	FALSE	FALSE
ribo	Ara-1	ECB_01958	0.9991425775554668	-0.00748027678734087	0.48354447831672853	0.9300433217779122	NA	FALSE	FALSE
ribo	Ara-1	ECB_01959	4.259054076576302	0.1651564502966658	0.47944777595093335	0.4064756404472379	NA	FALSE	FALSE
ribo	Ara-1	ECB_01960	0.0952580173277935	-0.014337373997168897	0.49478815040893903	0.9268960539205255	NA	FALSE	FALSE
ribo	Ara-1	ECB_01961	0.4275567448251433	0.030575924511670124	0.49086431270585273	0.7010970249144481	NA	FALSE	FALSE
ribo	Ara-1	ECB_01962	1.3842880439325387	0.0896533996778306	0.4860487880184612	0.52289148021802	NA	FALSE	FALSE
ribo	Ara-1	ECB_01963	2.1932230071978918	0.1270926602423246	0.488235658546657	0.42767503190993744	NA	FALSE	FALSE
ribo	Ara-1	ECB_01964	0.5718703814371833	0.01819783437434773	0.4876018029601048	0.8183399495946917	NA	FALSE	FALSE
ribo	Ara-1	ECB_01965	2.9850908064537753	-0.01841978919923774	0.46660550146212054	0.9050812558230833	NA	FALSE	FALSE
ribo	Ara-1	ECB_01966	3.493889931538289	-0.1719346514110458	0.4985782703264279	0.3321497698361873	NA	FALSE	FALSE
ribo	Ara-1	ECB_01967	0.0952580173277935	-0.014337373997168897	0.49478815040893903	0.9268960539205255	NA	FALSE	FALSE
ribo	Ara-1	ECB_01968	0.8913607528417119	0.11062136083922579	0.5015800119980207	0.31333361941883603	NA	FALSE	FALSE
ribo	Ara-1	ECB_01969	103.98832995037355	-0.06051490563741266	0.30132317534501546	0.7992879459104245	0.9435535383038736	FALSE	FALSE
ribo	Ara-1	ECB_01970	240.492772881174	-0.12877527537632477	0.2670653230130553	0.5651310875562296	0.8377812287761782	FALSE	FALSE
ribo	Ara-1	ECB_01971	263.8449004289009	0.05304055203648866	0.25492092867166494	0.8100235631820628	0.9466025468786383	FALSE	FALSE
ribo	Ara-1	ECB_01972	85.05600512618658	-0.024776070162033502	0.31431962746477904	0.9180495523770228	0.9742761457015646	FALSE	FALSE
ribo	Ara-1	ECB_01973	112.27851044695377	-0.17052625534675506	0.29911442456115644	0.474951575849648	0.789122952137779	FALSE	FALSE
ribo	Ara-1	ECB_01974	50.427858182406695	-0.11043694373645993	0.31332149415173266	0.6495110357656501	0.8775026646466537	FALSE	FALSE
ribo	Ara-1	ECB_01975	121.02391941470418	2.4842704397864797	0.4343235373826526	1.154030829099268e-9	6.366403407197628e-8	FALSE	TRUE
ribo	Ara-1	ECB_01976	9.100767664644792	0.0941112543896815	0.41895818501588217	0.6847460211123955	0.886786913015923	FALSE	FALSE
ribo	Ara-1	ECB_01977	0.21855041518632623	-0.023931721929523798	0.49487541345667585	0.9438560521028854	NA	FALSE	FALSE
ribo	Ara-1	ECB_01978	3.2239003549205054	0.17676014323210942	0.4906811094059985	0.361694183301497	NA	FALSE	FALSE
ribo	Ara-1	ECB_01979	26.798109566560246	0.5042517642814396	0.4199564253961039	0.08691041293823322	0.35272542306761306	FALSE	FALSE
ribo	Ara-1	ECB_01980	45.967244418528104	0.4681066605449291	0.3923005796772644	0.1018359613988628	0.387464773632202	FALSE	FALSE
ribo	Ara-1	ECB_01981	32.10276415942194	0.12647179781183238	0.35855782912538814	0.6167922717610195	0.8595152928998901	FALSE	FALSE
ribo	Ara-1	ECB_01982	22.02475180657892	0.13552821944457932	0.3925477297060821	0.587347313919393	0.848689622321252	FALSE	FALSE
ribo	Ara-1	ECB_01983	21.501786622310764	-0.01789736671591249	0.36525289862771254	0.940927891624472	0.9786956664635013	FALSE	FALSE
ribo	Ara-1	ECB_01984	109.05665004602764	-0.08445561787706309	0.2928225017218509	0.7198040337292522	0.9093134302316592	FALSE	FALSE
ribo	Ara-1	ECB_01985	10.69748256080302	-0.6329276688927452	0.8221860362630707	0.05242998265692854	0.2665339903327476	FALSE	FALSE
ribo	Ara-1	ECB_01986	59.52462230096339	0.3257453218938291	0.40442548524835575	0.23906422663243793	0.5969592046421062	FALSE	FALSE
ribo	Ara-1	ECB_01987	7.1609713216595186	-0.18493169673133455	0.4661853825469561	0.4078181261087583	NA	FALSE	FALSE
ribo	Ara-1	ECB_01988	9.52718865172774	-0.25868069472543065	0.47265642770094574	0.3019573308351757	0.6657660271683956	FALSE	FALSE
ribo	Ara-1	ECB_01989	3.2968699137492288	-0.1706444157757461	0.498170492753214	0.3407312353843317	NA	FALSE	FALSE
ribo	Ara-1	ECB_01990	2.070170330996131	-0.1951780708189229	0.5394167217565803	0.08865780795551742	NA	FALSE	FALSE
ribo	Ara-1	ECB_01991	3.0304082009921425	-0.15435556592603278	0.49535278870165605	0.37063509833511304	NA	FALSE	FALSE
ribo	Ara-1	ECB_01993	2.2003941970842305	0.24709370413890963	0.5393493526849791	0.18816632049413526	NA	FALSE	FALSE
ribo	Ara-1	ECB_01994	32.320296329397245	-0.1006837823004532	0.3737178938447152	0.6823169940381586	0.8860602987095355	FALSE	FALSE
ribo	Ara-1	ECB_01995	1.1322636096683685	-0.04753512241736625	0.4843063178961447	0.6984934580534248	NA	FALSE	FALSE
ribo	Ara-1	ECB_01996	2.070286185107843	-0.05918703923188387	0.4758927726923793	0.6913665378708429	NA	FALSE	FALSE
ribo	Ara-1	ECB_01997	0.5043244671697067	-0.049790039544845885	0.49616697942459026	0.6420518929516804	NA	FALSE	FALSE
ribo	Ara-1	ECB_01998	0.21504384429771023	-0.02362215961883249	0.494877164541081	0.9465740347683287	NA	FALSE	FALSE
ribo	Ara-1	ECB_01999	19.28945290228341	-0.5621261658957267	0.5299797629068083	0.07774823777454518	0.33040228292492163	FALSE	FALSE
ribo	Ara-1	ECB_02000	0.48011893499800573	0.0312039153322284	0.4894835444840189	0.7087914007104128	NA	FALSE	FALSE
ribo	Ara-1	ECB_02001	19.135465267087188	-0.09454077124259075	0.38921936984670935	0.7008280225456729	0.9002874856246483	FALSE	FALSE
ribo	Ara-1	ECB_02002	0.6241102941396235	-0.0706981789087125	0.49797116744968356	0.5045836950625779	NA	FALSE	FALSE
ribo	Ara-1	ECB_02003	46.94217020059585	0.1710893942170202	0.3320165861399456	0.49825584511158866	0.8017010894371169	FALSE	FALSE
ribo	Ara-1	ECB_02004	5.114320266835878	-0.5807238711674824	0.928163976572888	0.05076628254984332	NA	FALSE	FALSE
ribo	Ara-1	ECB_02005	0.24658479571706546	-0.021548458070208113	0.4951120507768313	0.9265687553134567	NA	FALSE	FALSE
ribo	Ara-1	ECB_02006	1.614157564215756	0.06719431771584258	0.4798774266449117	0.6369133632102753	NA	FALSE	FALSE
ribo	Ara-1	ECB_02007	0	NA	NA	NA	NA	FALSE	FALSE
ribo	Ara-1	ECB_02008	0	NA	NA	NA	NA	FALSE	FALSE
ribo	Ara-1	ECB_02009	1.3069134954106933	0.04688770860881417	0.4783410154965752	0.7285513467763187	NA	FALSE	FALSE
ribo	Ara-1	ECB_02010	1.6118733860226155	3.9998596561463816e-4	0.4772949383491137	0.9981139473523899	NA	FALSE	FALSE
ribo	Ara-1	ECB_02011	62.24009404602201	-0.4677133509416554	0.3633161489108615	0.08581693194486689	0.3501568100492599	FALSE	FALSE
ribo	Ara-1	ECB_02012	5.409825671634305	0.2357942056728191	0.48869422216800784	0.3015383985486368	NA	FALSE	FALSE
ribo	Ara-1	ECB_02013	2.043275806945046	-0.1236220964906892	0.4977003898198976	0.3705444424983344	NA	FALSE	FALSE
ribo	Ara-1	ECB_02014	3.5597766803680955	-0.029048540727731203	0.4541702894883606	0.8736539268114675	NA	FALSE	FALSE
ribo	Ara-1	ECB_02015	9.823090944026063	-1.4508258936017975	1.1779742997603575	0.015426248440741882	0.11950478379833067	FALSE	FALSE
ribo	Ara-1	ECB_02016	113.6059010683765	-0.3159839849479916	0.325543323564602	0.20947431049124193	0.5528580099569609	FALSE	FALSE
ribo	Ara-1	ECB_02017	65.8120377542016	0.06655020033272606	0.40989192446785533	0.7792915476345804	0.9364701574842337	FALSE	FALSE
ribo	Ara-1	ECB_02018	1.0770546216135168	-0.12840225487670745	0.5098728440711665	0.2426853622518817	NA	FALSE	FALSE
ribo	Ara-1	ECB_02019	0	NA	NA	NA	NA	FALSE	FALSE
ribo	Ara-1	ECB_02020	0.4275567448251433	0.030575924511670124	0.49086431270585273	0.7010970249144481	NA	FALSE	FALSE
ribo	Ara-1	ECB_02024	0.28410288121973015	-0.029108642279282757	0.4948788240059288	0.9383659533832887	NA	FALSE	FALSE
ribo	Ara-1	ECB_02025	84.2470894801434	-0.04396322507049944	0.3180005392675652	0.8558650192181161	0.9556477995806305	FALSE	FALSE
ribo	Ara-1	ECB_02026	29.286741260938197	0.10970022368170931	0.3505120830852404	0.6624944003738651	0.882071474892192	FALSE	FALSE
ribo	Ara-1	ECB_02027	57.78536788856921	-0.2561378037194294	0.3459362793857977	0.3167742985541647	0.6858575829931816	FALSE	FALSE
ribo	Ara-1	ECB_02028	39.405340352892964	-0.07495918036609595	0.3274239690822931	0.7598269849454723	0.9277919968048076	FALSE	FALSE
ribo	Ara-1	ECB_02029	22.25532621251971	-0.004243215096074357	0.36173748907739045	0.9851236261547203	0.992488211902008	FALSE	FALSE
ribo	Ara-1	ECB_02030	11.67604998890904	-0.019161758752532457	0.40170389448912935	0.9341552157180832	0.9772168026934688	FALSE	FALSE
ribo	Ara-1	ECB_02031	212.55851242078933	0.052901199649367445	0.29733484835423823	0.826416731892156	0.9468828631948973	FALSE	FALSE
ribo	Ara-1	ECB_02032	178.1727844735148	-0.03066354552558062	0.29272990557333334	0.8958074588195897	0.9668878332694049	FALSE	FALSE
ribo	Ara-1	ECB_02033	27.98740196236934	-0.027300670716354856	0.3525971292208963	0.9110625061843883	0.9706921337350833	FALSE	FALSE
ribo	Ara-1	ECB_02034	23.333198111675447	-0.5504198780404528	0.5461148022544206	0.07804684546697724	0.33119879294319826	FALSE	FALSE
ribo	Ara-1	ECB_02035	20.9986734306291	-0.4093630687084132	0.48741090195302245	0.15038568426990567	0.4725727356962542	FALSE	FALSE
ribo	Ara-1	ECB_02036	21.245976611930253	-0.3591055415620531	0.5129171973053124	0.18055693118996605	0.5107992069950409	FALSE	FALSE
ribo	Ara-1	ECB_02037	6.620934704115506	0.05719781568711013	0.44786051402158433	0.771417223171919	NA	FALSE	FALSE
ribo	Ara-1	ECB_02038	2.534961971457019	-1.318866646233803e-4	0.46870865760462	0.998414641568498	NA	FALSE	FALSE
ribo	Ara-1	ECB_02039	0.0952580173277935	-0.014337373997168897	0.49478815040893903	0.9268960539205255	NA	FALSE	FALSE
ribo	Ara-1	ECB_02042	41.84728699861025	-2.08303942716936	0.6945433443979415	1.5592404744938542e-4	0.0034154245393508767	FALSE	TRUE
ribo	Ara-1	ECB_02043	705.9043114776831	-0.2039861481439748	0.31464349665587815	0.40230446448865226	0.7443881985786927	FALSE	FALSE
ribo	Ara-1	ECB_02044	1438.5472989643392	0.47058940685719886	0.32282267428554473	0.07169007726363363	0.3136046111136044	FALSE	FALSE
ribo	Ara-1	ECB_02045	7.997623735485006	0.3780829098408627	0.5453295167437568	0.16100610570458598	NA	FALSE	FALSE
ribo	Ara-1	ECB_02046	17.568768727773485	-0.30934218131509084	0.4374520668399874	0.25130405269125183	0.6104160825505703	FALSE	FALSE
ribo	Ara-1	ECB_02047	1.1331233826749951	-0.1312934633078224	0.5108934109879182	0.23049809485545	NA	FALSE	FALSE
ribo	Ara-1	ECB_02048	0.23957165393983346	-0.021054641086711602	0.4951108552426235	0.9325609847475668	NA	FALSE	FALSE
ribo	Ara-1	ECB_02049	3.481119358575191	0.06962989130244626	0.45777638290687306	0.7096623056548365	NA	FALSE	FALSE
ribo	Ara-1	ECB_02050	1.9530810359977466	-0.030629922386881957	0.47579415275707615	0.8232991425305825	NA	FALSE	FALSE
ribo	Ara-1	ECB_02051	6.687093996326193	0.17555950772157874	0.45650183637462444	0.4372840483306381	NA	FALSE	FALSE
ribo	Ara-1	ECB_02052	3.877073993364426	-0.0812315547398906	0.46398338132158756	0.6568527090402136	NA	FALSE	FALSE
ribo	Ara-1	ECB_02053	69.47615728682624	0.14333791813896862	0.32661563594134946	0.5667709571942574	0.8382983620628881	FALSE	FALSE
ribo	Ara-1	ECB_02054	192.9260999208608	0.8735491760144171	0.4380944638365624	0.009416481100717832	0.08880544468161967	FALSE	FALSE
ribo	Ara-1	ECB_02055	39.466567696756904	0.937197044990379	0.5311919620119295	0.012593602025682308	0.10658051259803293	FALSE	FALSE
ribo	Ara-1	ECB_02056	15.150611606833005	-0.09315596743737442	0.39955529113966887	0.6981968709031908	0.8984572260996135	FALSE	FALSE
ribo	Ara-1	ECB_02057	48.69349117150679	0.008194690327463781	0.34065944169538387	0.9750417421818245	0.9889851378820753	FALSE	FALSE
ribo	Ara-1	ECB_02058	10.88085565198496	0.4179719427961597	0.5347382323826736	0.1422270360033698	0.46103845511864927	FALSE	FALSE
ribo	Ara-1	ECB_02059	8.248167482724538	0.10096052540220582	0.41942024621257096	0.6676441214433619	NA	FALSE	FALSE
ribo	Ara-1	ECB_02060	6.053559549890403	-0.6831897137867079	0.9904414663700155	0.05227830001971312	NA	FALSE	FALSE
ribo	Ara-1	ECB_02061	18.46131429990553	0.01455036737745787	0.37045959222026253	0.954064246402294	0.9831052888386144	FALSE	FALSE
ribo	Ara-1	ECB_02062	424.17779545230576	0.12873928917604024	0.2492710743925351	0.5527433966369384	0.831627564940121	FALSE	FALSE
ribo	Ara-1	ECB_02063	1197.468436676951	0.6895548906716976	0.32009275299172957	0.010116942552291331	0.09192986643081452	FALSE	FALSE
ribo	Ara-1	ECB_02064	188.2630711956857	-0.3125510461653683	0.3089822633600797	0.20143260341305297	0.5415773696457444	FALSE	FALSE
ribo	Ara-1	ECB_02065	6.464203491622321	-0.14955821760566487	0.4502662956203216	0.5045460753267053	NA	FALSE	FALSE
ribo	Ara-1	ECB_02066	26.21485518570316	-0.16562260729202172	0.3830313579645968	0.5106365688595977	0.8087960773988739	FALSE	FALSE
ribo	Ara-1	ECB_02067	9.07288342563464	-0.17396106672260855	0.4626079173389799	0.43248294962764205	0.7634211666836358	FALSE	FALSE
ribo	Ara-1	ECB_02068	1.2517045073558417	-0.03434246780912867	0.4832548293957399	0.7464767007627303	NA	FALSE	FALSE
ribo	Ara-1	ECB_02069	19.000116112378922	1.2246505950808484	0.6536553520532142	0.006045157221855508	0.06501271972529804	FALSE	FALSE
ribo	Ara-1	ECB_02070	37.10504302941429	-0.2930994583644463	0.48282425368311815	0.24452233686432584	0.6034197726844281	FALSE	FALSE
ribo	Ara-1	ECB_02071	24.716246650072318	-0.598327182072391	0.5818577892674802	0.06481484757264029	0.29716551271289754	FALSE	FALSE
ribo	Ara-1	ECB_02072	199.0652890392088	-0.2511883636329254	0.3591208372164509	0.3269032078854998	0.6896916829255694	FALSE	FALSE
ribo	Ara-1	ECB_02073	26.232226560000385	-0.25579263150610954	0.382837004618219	0.329609750347989	0.69107571005465	FALSE	FALSE
ribo	Ara-1	ECB_02074	12.373860399839137	-0.9251526211482229	0.8191049400612797	0.028033081717394416	0.17858236209609932	FALSE	FALSE
ribo	Ara-1	ECB_02075	3.8448551887061644	0.0196515056304596	0.4493188208154525	0.9189576242244734	NA	FALSE	FALSE
ribo	Ara-1	ECB_02076	4.808315080883932	0.017597866626861792	0.4451418389206213	0.9295143133115723	NA	FALSE	FALSE
ribo	Ara-1	ECB_02077	60.82552226493286	0.08431458625950287	0.3881287841832274	0.7339053690806401	0.914388998114273	FALSE	FALSE
ribo	Ara-1	ECB_02078	34.86425618718049	0.32685624942573965	0.41462425779113155	0.23836466627202454	0.5962118730683132	FALSE	FALSE
ribo	Ara-1	ECB_02079	269.2126336625943	1.3324035599366435	0.590971152275509	0.0027269517519998014	0.036104841196477375	FALSE	FALSE
ribo	Ara-1	ECB_02080	14.814847797022194	1.3197855569923078	0.6945409160515469	0.005268891754712663	0.058753298626626094	FALSE	FALSE
ribo	Ara-1	ECB_02081	156.41469417318748	-0.13616203295109888	0.3230110806148993	0.5779260626231129	0.8453332977411836	FALSE	FALSE
ribo	Ara-1	ECB_02082	4267.0583779990975	-0.41075939212753554	0.29968330680605865	0.08791187067423198	0.35534526830194985	FALSE	FALSE
ribo	Ara-1	ECB_02083	150.96939177944114	0.4780319160822683	0.3123437171074873	0.06127582742621124	0.2874656533900524	FALSE	FALSE
ribo	Ara-1	ECB_02084	5946.279879222121	0.0761389502891677	0.47087389598007623	0.6589531978613513	0.8797959302592229	FALSE	FALSE
ribo	Ara-1	ECB_02085	951.1878423957766	0.9637125977080211	0.6337028590973559	0.0182031789345933	0.1324354701749307	FALSE	FALSE
ribo	Ara-1	ECB_02086	66.1014574627755	-0.046746050541047655	0.3257069252622031	0.8481242050721955	0.9549671205541017	FALSE	FALSE
ribo	Ara-1	ECB_02087	28.780552705425208	-0.34719625760461736	0.40933794051253386	0.2063625106026863	0.5503616106404677	FALSE	FALSE
ribo	Ara-1	ECB_02088	173.45356479257575	-0.13159445715948087	0.29179223036125396	0.5753864102512445	0.843913816596081	FALSE	FALSE
ribo	Ara-1	ECB_02089	19.248833465270405	0.305442467171368	0.40714994270394567	0.260140402731895	0.6209601440210859	FALSE	FALSE
ribo	Ara-1	ECB_02090	8.503696085560412	0.08595627142394167	0.4314766355297705	0.6973722823923098	0.8981720835480721	FALSE	FALSE
ribo	Ara-1	ECB_02091	0.6409294183592031	0.015879664940065815	0.48616505067497945	0.8444434036882205	NA	FALSE	FALSE
ribo	Ara-1	ECB_02092	0.7012002939546091	-0.07822186722373686	0.49901746658049	0.4547122108644079	NA	FALSE	FALSE
ribo	Ara-1	ECB_02093	2.9071290283061826	-0.006175929861322201	0.4652648090693552	0.9677081948021274	NA	FALSE	FALSE
ribo	Ara-1	ECB_02094	0.8124176624953555	0.08336666020134904	0.4917016132049962	0.4778841666119785	NA	FALSE	FALSE
ribo	Ara-1	ECB_02095	0	NA	NA	NA	NA	FALSE	FALSE
ribo	Ara-1	ECB_02096	327.0006768530838	-0.257584442577834	0.5636778860459105	0.11111682907916565	0.41171272864034136	FALSE	FALSE
ribo	Ara-1	ECB_02097	158.5693813405877	-0.30394109253902374	0.6149413298048685	0.04577502759478734	0.2468480410904134	FALSE	FALSE
ribo	Ara-1	ECB_02098	209.72039982258062	-1.5384319389425012	0.9022718772335334	0.00288191956916877	0.037820433464994564	FALSE	FALSE
ribo	Ara-1	ECB_02099	17.521559257979998	0.6748549083131229	0.6069812587800357	0.053400136230076174	0.2674270305697806	FALSE	FALSE
ribo	Ara-1	ECB_02100	12.810323628711556	0.5000954668272773	0.5679714463460585	0.10171798818864035	0.387464773632202	FALSE	FALSE
ribo	Ara-1	ECB_02101	250.6245342560939	1.482728703766125	0.3833256430299636	1.3944577802223863e-5	3.956275930745227e-4	FALSE	TRUE
ribo	Ara-1	ECB_02102	19.34325560670058	-0.1283574929233473	0.4191699267776329	0.5878082503432925	0.848689622321252	FALSE	FALSE
ribo	Ara-1	ECB_02103	89.19828147190015	-0.008544817133862214	0.3019096782990586	0.9697361070055809	0.9873213478816388	FALSE	FALSE
ribo	Ara-1	ECB_02104	125.17292886322416	1.0299798068212347	0.588090248333321	0.011127488243136488	0.0986571055842369	FALSE	FALSE
ribo	Ara-1	ECB_02105	199.2763517229751	0.5864033476772016	0.41303711231877227	0.053413589523000835	0.2674270305697806	FALSE	FALSE
ribo	Ara-1	ECB_02106	20.152820002907013	0.04478688760615772	0.3685775713493087	0.8570731752076027	0.955820577407613	FALSE	FALSE
ribo	Ara-1	ECB_02107	48.95457650906572	-0.18459078471516835	0.3394225541809861	0.4625675449053779	0.7828290256645158	FALSE	FALSE
ribo	Ara-1	ECB_02108	28.675808674370394	0.151944097940319	0.3482033402643321	0.5496489753274679	0.8303267228704498	FALSE	FALSE
ribo	Ara-1	ECB_02109	38.67969032027822	-0.061366140242240665	0.33506310164030184	0.8027486639333297	0.9441293020996605	FALSE	FALSE
ribo	Ara-1	ECB_02110	109.97264284337953	0.33046287978368405	0.3177036302089954	0.1920809785199135	0.5293332423781889	FALSE	FALSE
ribo	Ara-1	ECB_02111	62.86256445590065	0.030721863860227107	0.30338363152318043	0.8992273986347883	0.9679239107327312	FALSE	FALSE
ribo	Ara-1	ECB_02112	73.75298464942006	0.16340225098432706	0.30635618490832317	0.5025077877261516	0.8047856085637201	FALSE	FALSE
ribo	Ara-1	ECB_02113	164.0158346062509	-0.1721612210183633	0.3420831219080493	0.4915477839345019	0.7968116148348988	FALSE	FALSE
ribo	Ara-1	ECB_02114	49.166799626929425	-0.087741947210765045	0.32508110082738223	0.7203513178491622	0.9093134302316592	FALSE	FALSE
ribo	Ara-1	ECB_02115	1698.5821510640212	0.782528367949456	0.4003308170307658	0.012563269736112173	0.10658051259803293	FALSE	FALSE
ribo	Ara-1	ECB_02116	592.2822950500346	0.32909380813967243	0.31072533944426495	0.1884639752762588	0.52275063533331	FALSE	FALSE
ribo	Ara-1	ECB_02117	42.091154616253306	0.37375697250395656	0.3874272608572199	0.1784257497129869	0.5107992069950409	FALSE	FALSE
ribo	Ara-1	ECB_02118	177.05883916232165	-0.008295652477281321	0.26380397234154734	0.9691361548413358	0.9873213478816388	FALSE	FALSE
ribo	Ara-1	ECB_02119	20.36267953820605	-0.43374330871757577	0.47868672268844137	0.13656236961148802	0.4533053424508032	FALSE	FALSE
ribo	Ara-1	ECB_02120	61.37037910762618	-0.23035261596074957	0.37585657562447095	0.37290251443891104	0.7184727798985043	FALSE	FALSE
ribo	Ara-1	ECB_02121	61.49625415246701	-1.9655403628513985	0.530478660897452	1.3641118715890858e-5	3.907393524484506e-4	FALSE	TRUE
ribo	Ara-1	ECB_02122	21.323299343918517	-3.586318721404172	1.13790255193497	2.897545609534494e-4	0.0059121838156186695	FALSE	TRUE
ribo	Ara-1	ECB_02123	56.81432948831772	-1.8350815038466601	0.5690106561059876	7.474113616214472e-5	0.001781230757016233	FALSE	TRUE
ribo	Ara-1	ECB_02124	18.51523694823724	-0.8985373198424862	0.703974430663704	0.0234791935598445	0.15860434833282713	FALSE	FALSE
ribo	Ara-1	ECB_02125	8.075174078233784	-0.275447399824027	0.5473319264049552	0.17168327456529192	NA	FALSE	FALSE
ribo	Ara-1	ECB_02126	60.56333207559764	-1.3892752440794878	0.5603344576848844	9.512123013026885e-4	0.015742563586559497	FALSE	FALSE
ribo	Ara-1	ECB_02127	6.951592980460736	-0.5455400872174592	0.7513376392351676	0.07231382833839539	NA	FALSE	FALSE
ribo	Ara-1	ECB_02128	8.175659622436793	-0.30074897154884017	0.5448362521103021	0.18516396681025507	NA	FALSE	FALSE
[truncated: 88,927 more rows]
